# Supplementary material for: Activity-dependent regulation of mitochondrial motility in developing cortical dendrites
Source: eLife. 2021 Sep 7;10:e62091. doi: 10.7554/eLife.62091 (PMC8423438; doi:10.7554/eLife.62091)
Supplement: Figure 2—figure supplement 1—source data 1. [file elife-62091-fig2-figsupp1-data1.xlsx]

## Sheet: Sheet1
Experiment	Age	Condition	Frq_global_ca_transients (#/min)	Mitos_moving %
26	5	isoflurane	0	3.14414
34	6	isoflurane	0	3.05691
27	7	isoflurane	0	1.67531
28	7	isoflurane	0	3.17475
37	7	isoflurane	0.05	3.1163
20	8	isoflurane	0.306667	0.418927
23	8	isoflurane	0.275	0.705132
16	9	isoflurane	0.15	0.592173
18	9	isoflurane	0.626667	0.150502
31	9	isoflurane	0.866667	1.04528
35	9	isoflurane	0.492308	1.33874
19	10	isoflurane	0.6	1.81943
22	10	isoflurane	0.7125	0.584948
29	10	isoflurane	0.811765	1.66318
32	10	isoflurane	0.771429	2.5541
33	10	isoflurane	0.275	3.4637
17	11	isoflurane	0.75	0.753902
24	11	isoflurane	0.15	2.0717
25	11	isoflurane	0.475	1.29187
