# Supplementary material for: Activity-dependent regulation of mitochondrial motility in developing cortical dendrites
Source: eLife. 2021 Sep 7;10:e62091. doi: 10.7554/eLife.62091 (PMC8423438; doi:10.7554/eLife.62091)
Supplement: Figure 2—figure supplement 1—source data 3. [file elife-62091-fig2-figsupp1-data3.xlsx]

## Sheet: Sheet1
Mitochondrion #	Mito_speed 2 min before	Mito_speed 2 min after
#1	NaN	0.149283		0.0673143	1029
#2	NaN	0.0210642
#3	NaN	0.939474
#4	NaN	0.818519
#5	NaN	0.579545
#6	NaN	0.825714
#7	NaN	0.600862
#8	NaN	0.650781
#9	0.770312	0.770312
#10	NaN	0.232168
#11	NaN	0.202985
#12	NaN	0.0656472
#13	NaN	0.0772851
#14	NaN	0.536842
#15	NaN	0.259875
#16	0.146338	0.146338
#17	NaN	0.259347
#18	0.770312	NaN
#19	NaN	0.383229
#20	NaN	0.632724
#21	0.0760813	NaN
#22	NaN	0.9622
#23	NaN	0.833907
#24	0.597444	0.597444
#25	1.65897	NaN
#26	NaN	0.916381
#27	NaN	0.261538
#28	NaN	0.306
#29	0.716429	NaN
#30	NaN	0.68
#31	NaN	0.0246111
#32	NaN	0.0915324
#33	NaN	0.85
#34	NaN	0.134211
#35	NaN	0.570395
#36	NaN	0.92234
#37	NaN	0.85
#38	NaN	0.834821
#39	NaN	1.03085
#40	NaN	0.860625
#41	NaN	0.68
#42	NaN	0.371875
#43	NaN	0.270455
#44	0.381034	NaN
#45	NaN	0.218939
#46	NaN	1.13333
#47	NaN	0.85
#48	NaN	1.40857
#49	NaN	1.06702
#50	NaN	1.61875
#51	NaN	0.389474
#52	NaN	0.822222
#53	NaN	0.513889
#54	NaN	0.460417
#55	NaN	0.357895
#56	NaN	0.85
#57	NaN	0.85
#58	0.864912	NaN
#59	NaN	0.703763
#60	NaN	0.65
#61	NaN	0.62963
#62	NaN	0.540909
#63	NaN	0.939474
#64	NaN	0.818519
#65	NaN	0.579545
#66	NaN	0.825714
#67	NaN	0.784615
#68	0.600862	NaN
#69	NaN	0.650781
#70	0.991667	NaN
#71	0.7	NaN
#72	1.76403	NaN
#73	0.0187923	0.0187923
#74	NaN	0.232168
#75	NaN	0.232168
#76	0.85	NaN
#77	NaN	0.834821
#78	NaN	1.03085
#79	NaN	0.860625
#80	0.0760813	NaN
#81	NaN	0.0948184
#82	NaN	0.627381
#83	NaN	0.975926
#84	0.202985	0.202985
#85	NaN	0.85
#86	1.7	NaN
#87	NaN	0.85
#88	NaN	0.85
#89	NaN	0.95
#90	NaN	1.15357
#91	NaN	1.20789
#92	1.01452	NaN
#93	NaN	0.991667
#94	0.85	NaN
#95	NaN	0.259875
#96	0.146338	NaN
#97	NaN	0.259347
#98	NaN	0.570395
#99	0.92234	NaN
#100	NaN	0.536842
#101	0.770312	NaN
#102	NaN	0.367568
#103	NaN	0.544
#104	NaN	0.765
#105	0.584375	NaN
#106	0.68	NaN
#107	NaN	0.560638
#108	0.52193	NaN
#109	0.832653	NaN
#110	NaN	0.619286
#111	NaN	0.716429
#112	NaN	1.33571
#113	0.989552	0.989552
#114	NaN	1.25182
#115	NaN	1.07174
#116	NaN	0.822283
#117	NaN	0.280642
#118	NaN	0.477688
#119	NaN	0.878198
#120	NaN	1.53077
#121	NaN	0.134211
#122	NaN	0.51
#123	NaN	0.259875
#124	0.146338	NaN
#125	NaN	0.259347
#126	NaN	0.28585
#127	0.383229	NaN
#128	NaN	0.632724
#129	0.0760813	NaN
#130	NaN	0.0948184
#131	0.43871	NaN
#132	0.375581	NaN
#133	NaN	0.769048
#134	NaN	0.765
#135	0.59918	NaN
#136	NaN	1.32222
#137	0.256604	0.256604
#138	0.325	NaN
#139	0.516071	NaN
#140	0.952	NaN
#141	NaN	0.661103
#142	NaN	0.821713
#143	NaN	0.750102
#144	0.718885	NaN
#145	0.331793	NaN
#146	0.759632	NaN
#147	NaN	0.130027
#148	NaN	1.02
#149	NaN	0.18319
#150	NaN	1.19
#151	1.09022	NaN
#152	0.359816	NaN
#153	NaN	0.86954
#154	0.760189	NaN
#155	0.85	NaN
#156	NaN	0.834821
#157	NaN	1.03085
#158	0.860625	NaN
#159	0.655513	NaN
#160	0.700013	NaN
#161	0.813801	NaN
#162	NaN	0.0485714
#163	NaN	0.0867956
#164	1.61875	NaN
#165	0.389474	NaN
#166	0.822222	NaN
#167	0.513889	NaN
#168	NaN	0.65
#169	NaN	0.554348
#170	NaN	0.62963
#171	NaN	0.540909
#172	NaN	0.939474
#173	0.818519	NaN
#174	0.579545	NaN
#175	0.825714	NaN
#176	NaN	0.784615
#177	0.600862	NaN
#178	0.650781	NaN
#179	0.218682	NaN
#180	0.129328	NaN
#181	0.770312	NaN
#182	1.76403	NaN
#183	0.760189	NaN
#184	NaN	0.661103
#185	0.821713	NaN
#186	NaN	0.750102
#187	0.718885	NaN
#188	0.331793	NaN
#189	0.759632	NaN
#190	NaN	0.130027
#191	NaN	0.613889
#192	0.661111	NaN
#193	NaN	0.694167
#194	0.745614	NaN
#195	0.815306	NaN
#196	0.841584	NaN
#197	1.10319	1.10319
#198	NaN	1.43158
#199	0.813043	NaN
#200	NaN	0.735014
#201	0.494186	NaN
#202	0.559211	0.559211
#203	NaN	0.442958
#204	0.78254	NaN
#205	NaN	0.0485714
#206	NaN	0.0867956
#207	NaN	0.134723
#208	0.68	NaN
#209	NaN	0.371875
#210	0.270455	NaN
#211	0.381034	NaN
#212	0.218939	0.218939
#213	1.13333	NaN
#214	NaN	1.258
#215	0.85	NaN
#216	NaN	1.28871
#217	NaN	1.40857
#218	1.06702	NaN
#219	0.627381	NaN
#220	0.975926	NaN
#221	0.991667	NaN
#222	0.7	NaN
#223	0.259875	NaN
#224	0.146338	NaN
#225	0.259347	NaN
#226	0.202985	NaN
#227	NaN	0.65
#228	NaN	0.554348
#229	NaN	0.62963
#230	NaN	0.540909
#231	0.939474	0.939474
#232	0.818519	NaN
#233	0.579545	NaN
#234	0.825714	NaN
#235	NaN	0.784615
#236	0.600862	NaN
#237	0.650781	NaN
#238	0.043027	NaN
#239	0.570395	0.570395
#240	0.92234	NaN
#241	0.534677	NaN
#242	0.644505	NaN
#243	NaN	0.466541
#244	NaN	0.0784872
#245	0.844035	NaN
#246	1.00229	NaN
#247	0.534556	NaN
#248	1.76403	NaN
#249	NaN	0.757031
#250	0.551142	NaN
#251	0.85	NaN
#252	0.834821	0.834821
#253	1.03085	NaN
#254	0.860625	NaN
#255	NaN	0.0654256
#256	0.280642	NaN
#257	NaN	0.477688
#258	NaN	0.878198
#259	NaN	1.53077
#260	0.570395	NaN
#261	0.92234	NaN
#262	0.536842	NaN
#263	0.367568	NaN
#264	NaN	0.544
#265	0.765	NaN
#266	0.584375	NaN
#267	0.560638	NaN
#268	0.52193	NaN
#269	0.832653	NaN
#270	0.619286	NaN
#271	0.716429	NaN
#272	NaN	1.33571
#273	0.989552	NaN
#274	1.25182	NaN
#275	1.07174	NaN
#276	0.822283	NaN
#277	1.32222	NaN
#278	0.256604	NaN
#279	0.516071	NaN
#280	0.952	NaN
#281	0.255	NaN
#282	0.505952	NaN
#283	0.487963	NaN
#284	1.08511	NaN
#285	0.261538	NaN
#286	0.306	NaN
#287	0.68	NaN
#288	0.85	NaN
#289	0.834821	NaN
#290	1.03085	NaN
#291	0.860625	NaN
#292	NaN	0.0654256
#293	NaN	0.0954472
#294	1.76403	NaN
#295	NaN	0.613889
#296	0.661111	NaN
#297	NaN	0.694167
#298	0.815306	NaN
#299	1.10319	NaN
#300	1.43158	NaN
#301	0.813043	NaN
#302	0.149283	NaN
#303	0.0162786	NaN
#304	0.134211	NaN
#305	NaN	0.51
#306	0.85	NaN
#307	0.834821	NaN
#308	1.03085	NaN
#309	0.860625	NaN
#310	0.68	NaN
#311	0.371875	NaN
#312	0.270455	NaN
#313	0.218939	NaN
#314	1.13333	NaN
#315	NaN	1.258
#316	0.85	NaN
#317	1.28871	1.28871
#318	1.40857	NaN
#319	1.06702	NaN
#320	0.494186	NaN
#321	0.559211	NaN
#322	0.442958	NaN
#323	0.65	NaN
#324	NaN	0.554348
#325	0.62963	NaN
#326	0.540909	NaN
#327	0.939474	NaN
#328	0.818519	NaN
#329	0.579545	NaN
#330	0.825714	NaN
#331	0.784615	NaN
#332	0.650781	NaN
#333	NaN	0.0458222
#334	NaN	0.0500542
#335	NaN	0.769048
#336	0.765	0.765
#337	0.0191156	NaN
#338	0.0656472	NaN
#339	0.148031	NaN
#340	0.0772851	NaN
#341	0.280642	NaN
#342	0.477688	NaN
#343	0.878198	0.878198
#344	1.53077	NaN
#345	0.437364	NaN
#346	0.45819	NaN
#347	0.478287	NaN
#348	1.17191	NaN
#349	0.49525	NaN
#350	1.05504	NaN
#351	0.526577	NaN
#352	0.76976	NaN
#353	0.813801	NaN
#354	0.149283	NaN
#355	NaN	0.0654256
#356	NaN	0.0954472
#357	0.0191156	NaN
#358	0.259875	NaN
#359	0.259347	NaN
#360	0.156778	NaN
#361	0.0895876	0.0895876
#362	0.0538876	NaN
#363	0.0691622	NaN
#364	NaN	0.0377703
#365	NaN	0.013063
#366	NaN	0.0385916
#367	NaN	0.0827397
#368	0.0246111	NaN
#369	0.0915324	NaN
#370	NaN	0.0784872
#371	NaN	0.144521
#372	0.0458222	NaN
#373	NaN	0.0500542
#374	NaN	0.0262933
#375	NaN	0.0143407
#376	0.0334617	NaN
#377	0.0187923	NaN
#378	0.156778	NaN
#379	0.0895876	NaN
#380	0.0377703	NaN
#381	0.013063	NaN
#382	0.0385916	NaN
#383	0.0827397	NaN
#384	0.0784872	NaN
#385	0.144521	NaN
#386	0.0275332	NaN
#387	NaN	0.01938
#388	NaN	0.0252064
#389	0.026252	0.026252
#390	NaN	0.0330056
#391	NaN	0.0532586
#392	NaN	0.0446156
#393	NaN	0.0998237
#394	NaN	0.0428942
#395	NaN	0.0960458
#396	NaN	0.172917
#397	NaN	0.189854
#398	NaN	0.784615
#399	NaN	0.121429
#400	NaN	0.708333
#401	NaN	0.157407
#402	NaN	0.478125
#403	NaN	0.85
#404	NaN	0.425
#405	NaN	0.479487
#406	NaN	0.372807
#407	NaN	0.403205
#408	NaN	0.616667
#409	NaN	0.0292985
#410	0.125548	NaN
#411	NaN	0.0991059
#412	0.0580132	0.0580132
#413	0.0580132	0.0580132
#414	NaN	0.0339785
#415	0.304397	NaN
#416	0	NaN
#417	NaN	0
#418	0.0364062	NaN
#419	NaN	0.026437
#420	0.0549227	0.0549227
#421	NaN	0.816
#422	NaN	0.463636
#423	NaN	0.530108
#424	0.608257	NaN
#425	NaN	0.840957
#426	NaN	0.364286
#427	NaN	0.1088
#428	NaN	0.0306673
#429	NaN	0.103226
#430	NaN	0.00782386
#431	NaN	0.00877929
#432	NaN	0.0135433
#433	NaN	0.00823867
#434	NaN	0.0360202
#435	NaN	0.0815195
#436	NaN	0.01173
#437	NaN	0.0159296
#438	NaN	0.0320763
#439	0.784615	NaN
#440	0.121429	NaN
#441	0.708333	NaN
#442	0.157407	NaN
#443	0.478125	NaN
#444	0.85	NaN
#445	0.425	NaN
#446	0.479487	NaN
#447	NaN	0.372807
#448	0.403205	0.403205
#449	NaN	0.616667
#450	NaN	0.228846
#451	NaN	0.115909
#452	NaN	0.784615
#453	0.498276	NaN
#454	NaN	0.68
#455	NaN	0.271649
#456	NaN	1.258
#457	0.125	NaN
#458	NaN	0.283333
#459	0.34	NaN
#460	NaN	0.261538
#461	0.935	NaN
#462	NaN	0.767742
#463	NaN	0.49717
#464	NaN	0.188323
#465	0.92907	NaN
#466	NaN	0.76
#467	0.0292985	0.0292985
#468	0.022126	NaN
#469	NaN	0.337614
#470	NaN	0.35903
#471	0.0832091	0.0832091
#472	NaN	0.601375
#473	NaN	0.0375619
#474	0.0955967	NaN
#475	NaN	0.0682833
#476	NaN	0.322414
#477	NaN	0.377778
#478	NaN	0.401389
#479	NaN	0.294231
#480	NaN	0.381884
#481	NaN	0.595
#482	NaN	0.337614
#483	NaN	0.35903
#484	0.0832091	NaN
#485	NaN	0.601375
#486	NaN	0.55
#487	NaN	1.20714
#488	NaN	1.42817
#489	NaN	1.21613
#490	NaN	0.1088
#491	NaN	0.0306673
#492	NaN	0.103226
#493	NaN	0.75
#494	NaN	0.226667
#495	0.51	NaN
#496	0.379231	0.379231
#497	NaN	0.473196
#498	NaN	0.468966
#499	NaN	0.529245
#500	NaN	0.769048
#501	0.649091	NaN
#502	NaN	0.593534
#503	NaN	0.1088
#504	NaN	0.0306673
#505	NaN	0.103226
#506	NaN	0.222159
#507	NaN	0.647619
#508	NaN	0.454651
#509	0.595	NaN
#510	NaN	0.0089675
#511	0.00484859	0.00484859
#512	NaN	0.0110304
#513	0.00699019	0.00699019
#514	NaN	0.0525867
#515	NaN	0.0369565
#516	NaN	0.103659
#517	NaN	0.115909
#518	NaN	0.332609
#519	NaN	0.315714
#520	NaN	0.157857
#521	0.607143	NaN
#522	0.234868	0.234868
#523	0.651667	NaN
#524	0.547458	NaN
#525	NaN	0.288017
#526	NaN	0.665217
#527	0.793333	NaN
#528	0.760526	NaN
#529	NaN	0.816
#530	NaN	0.463636
#531	0.530108	NaN
#532	0.608257	NaN
#533	NaN	0.500403
#534	NaN	0.840957
#535	NaN	0.75
#536	NaN	0.226667
#537	0.121429	NaN
#538	0.708333	NaN
#539	0.157407	NaN
#540	0.478125	NaN
#541	0.85	NaN
#542	0.425	NaN
#543	0.479487	NaN
#544	0.372807	0.372807
#545	0.403205	NaN
#546	NaN	0.616667
#547	0.6	NaN
#548	NaN	1.31548
#549	NaN	0.0549388
#550	NaN	0.629287
#551	NaN	1.05696
#552	NaN	0.337614
#553	NaN	0.35903
#554	0.0832091	NaN
#555	NaN	0.601375
#556	NaN	0.890926
#557	0.386364	NaN
#558	0.236111	NaN
#559	NaN	0.283333
#560	0.4675	NaN
#561	0.495833	NaN
#562	0.370513	NaN
#563	NaN	0.40375
#564	0.522289	NaN
#565	NaN	0.1088
#566	0.0306673	NaN
#567	NaN	0.103226
#568	0.0364062	NaN
#569	NaN	0.0102425
#570	NaN	0.026437
#571	0.0549227	NaN
#572	NaN	0.605303
#573	0.595794	NaN
#574	0.816	NaN
#575	0.463636	NaN
#576	0.530108	NaN
#577	0.608257	NaN
#578	NaN	0.500403
#579	NaN	0.840957
#580	NaN	0.0796931
#581	NaN	0.100922
#582	NaN	0.0796931
#583	0.468966	NaN
#584	0.529245	NaN
#585	NaN	0.769048
#586	0.649091	NaN
#587	NaN	0.593534
#588	0.51	NaN
#589	0.379231	NaN
#590	NaN	0.473196
#591	0.0410247	NaN
#592	0.069735	0.069735
#593	NaN	0.17787
#594	NaN	0.0511105
#595	NaN	0.243641
#596	0.0248578	NaN
#597	NaN	0.0172102
#598	NaN	0.85
#599	0.538333	NaN
#600	NaN	0.263793
#601	NaN	0.62027
#602	0.380263	NaN
#603	NaN	1.36739
#604	NaN	1.10635
#605	NaN	0.840116
#606	0.0410247	NaN
#607	0.069735	NaN
#608	NaN	0.17787
#609	NaN	0.0511105
#610	NaN	0.243641
#611	NaN	0.85
#612	0.538333	NaN
#613	NaN	0.263793
#614	NaN	0.62027
#615	0.380263	NaN
#616	NaN	1.36739
#617	NaN	1.10635
#618	NaN	0.840116
#619	0.85	NaN
#620	0.576786	NaN
#621	0.578723	NaN
#622	0.72459	NaN
#623	0.673377	NaN
#624	0.351724	NaN
#625	NaN	0.364286
#626	0.198701	NaN
#627	0.435366	NaN
#628	NaN	0.62027
#629	0.712162	NaN
#630	NaN	0.708333
#631	1.08611	1.08611
#632	0.816	NaN
#633	0.463636	NaN
#634	0.530108	NaN
#635	0.608257	NaN
#636	NaN	0.500403
#637	NaN	0.840957
#638	0.028679	NaN
#639	NaN	0.0301155
#640	NaN	0.0457087
#641	0.0338057	NaN
#642	NaN	0.0412998
#643	NaN	0.06327
#644	0.0484022	NaN
#645	0.0231961	0.0231961
#646	NaN	0.0527658
#647	0.0159296	NaN
#648	0.0320763	NaN
#649	0.351724	NaN
#650	NaN	0.364286
#651	0.198701	NaN
#652	0.435366	NaN
#653	NaN	0.62027
#654	0.712162	NaN
#655	NaN	0.708333
#656	1.08611	1.08611
#657	0.0648114	0.0648114
#658	NaN	0.0651067
#659	NaN	0.0449498
#660	NaN	0.629287
#661	NaN	1.05696
#662	0.337614	NaN
#663	0.35903	NaN
#664	0.0832091	NaN
#665	0.601375	NaN
#666	NaN	0.890926
#667	0.351724	NaN
#668	NaN	0.364286
#669	0.198701	NaN
#670	0.435366	NaN
#671	NaN	0.62027
#672	0.712162	NaN
#673	NaN	0.708333
#674	1.08611	NaN
#675	NaN	0.054502
#676	0.0955967	NaN
#677	0.0682833	NaN
#678	NaN	0.0533968
#679	0.0998237	NaN
#680	0.0428942	NaN
#681	0.0960458	NaN
#682	0.172917	NaN
#683	NaN	0.0771639
#684	NaN	0.192123
#685	NaN	0.175094
#686	NaN	0.244091
#687	0.189854	NaN
#688	0.0648114	NaN
#689	NaN	0.0651067
#690	NaN	0.0449498
#691	NaN	0.0167931
#692	0.0176066	NaN
#693	NaN	0.060945
#694	NaN	0.065375
#695	0.0595321	NaN
#696	0.85	NaN
#697	0.576786	NaN
#698	0.578723	NaN
#699	0.72459	NaN
#700	0.673377	NaN
#701	0.03037	NaN
#702	0.0344207	NaN
#703	NaN	0.0621492
#704	0.0187201	0.0187201
#705	NaN	0.0301662
#706	0.0459923	NaN
#707	NaN	0.0390031
#708	NaN	0.0796931
#709	0.485714	NaN
#710	0.137097	NaN
#711	0.269512	NaN
#712	0.14069	NaN
#713	0.2125	NaN
#714	0.655714	NaN
#715	0.431746	NaN
#716	0.386364	NaN
#717	0.452597	NaN
#718	0.182143	NaN
#719	NaN	0.661111
#720	NaN	0.85
#721	0.143662	NaN
#722	NaN	0.671053
#723	0.200694	NaN
#724	0.51	NaN
#725	0.504687	NaN
#726	NaN	0.255
#727	NaN	0.337302
#728	NaN	0.502273
#729	NaN	0.476
#730	0.299432	NaN
#731	0.295652	NaN
#732	0.289362	0.289362
#733	0.906667	NaN
#734	0.695455	NaN
#735	NaN	0.68
#736	0.443478	NaN
#737	0.670833	NaN
#738	0.485714	NaN
#739	0.137097	NaN
#740	0.269512	NaN
#741	0.6	NaN
#742	NaN	1.31548
#743	0.146067	NaN
#744	0.478528	NaN
#745	NaN	0.335156
#746	0.529381	NaN
#747	0.693865	NaN
#748	0.0562759	NaN
#749	NaN	0.0172102
#750	0.613889	NaN
#751	0.0634328	NaN
#752	0.128788	NaN
#753	0.3	NaN
#754	0.114179	NaN
#755	0.85	NaN
#756	0.971429	NaN
#757	1.13333	NaN
#758	0.776087	NaN
#759	0.525	NaN
#760	0.217222	NaN
#761	NaN	0.441346
#762	0.85	NaN
#763	0.540909	NaN
#764	0.634127	NaN
#765	0.678283	0.678283
#766	0.511988	NaN
#767	0.816	NaN
#768	0.463636	NaN
#769	0.530108	NaN
#770	NaN	0.500403
#771	0.840957	NaN
#772	0.0428942	NaN
#773	0.0960458	NaN
#774	0.172917	NaN
#775	0.0771639	0.0771639
#776	NaN	0.192123
#777	NaN	0.175094
#778	NaN	0.244091
#779	0.189854	NaN
#780	NaN	0.273623
#781	0.0991059	NaN
#782	NaN	0.096963
#783	0.0339785	NaN
#784	NaN	0.0858557
#785	NaN	0.0976346
#786	0.113333	NaN
#787	0	NaN
#788	0.55	NaN
#789	1.20714	NaN
#790	1.42817	NaN
#791	1.21613	NaN
#792	0.468966	NaN
#793	0.529245	NaN
#794	0.769048	NaN
#795	0.649091	NaN
#796	0.593534	0.593534
#797	0.379231	NaN
#798	0.473196	NaN
#799	NaN	0.273623
#800	0.0991059	NaN
#801	NaN	0.096963
#802	0.0339785	NaN
#803	NaN	0.0858557
#804	NaN	0.0976346
#805	0.113333	NaN
#806	0	NaN
#807	0.0089675	NaN
#808	0.00484859	NaN
#809	0.0110304	NaN
#810	0.00699019	NaN
#811	NaN	0.011475
#812	NaN	0.0146905
#813	NaN	0.0676114
#814	NaN	0.0711548
#815	0.0525867	0.0525867
#816	NaN	0.0467992
#817	0.0533968	NaN
#818	1.625	NaN
#819	1.625	NaN
#820	1.14706	NaN
#821	1.45758	NaN
#822	1.67143	NaN
#823	1.68519	NaN
#824	0.776829	NaN
#825	NaN	0.629287
#826	NaN	1.05696
#827	0.337614	NaN
#828	0.35903	NaN
#829	0.0832091	NaN
#830	0.601375	NaN
#831	NaN	0.890926
#832	0.121429	NaN
#833	0.197674	0.197674
#834	0.154545	NaN
#835	NaN	0.695455
#836	1.04125	NaN
#837	0.0375619	NaN
#838	NaN	0.043027
#839	NaN	0.0512429
#840	NaN	0.054502
#841	0.0682833	NaN
#842	0.55	NaN
#843	1.20714	NaN
#844	1.42817	NaN
#845	1.21613	NaN
#846	0.069735	NaN
#847	0.17787	NaN
#848	NaN	0.0511105
#849	0.243641	0.243641
#850	0.605303	NaN
#851	0.816	NaN
#852	0.463636	NaN
#853	0.530108	NaN
#854	0.500403	0.500403
#855	0.840957	NaN
#856	0.485714	NaN
#857	0.137097	NaN
#858	0.269512	NaN
#859	NaN	0.0195655
#860	NaN	0.0184329
#861	NaN	0.0276675
#862	0.0676114	NaN
#863	0.0221267	NaN
#864	NaN	0.0704032
#865	0.0123762	NaN
#866	NaN	0.0448163
#867	NaN	0.019363
#868	NaN	0.0231058
#869	NaN	0.044455
#870	NaN	0.0307301
#871	0.055516	NaN
#872	NaN	0.0604695
#873	0.0417401	NaN
#874	NaN	0.069445
#875	NaN	0.0457416
#876	0.35	NaN
#877	0.95625	NaN
#878	0.364286	NaN
#879	0.474419	NaN
#880	0.487963	NaN
#881	0.752857	NaN
#882	0.741026	NaN
#883	0.872368	NaN
#884	1.36	1.36
#885	0.880909	NaN
#886	NaN	0.0796931
#887	NaN	0.100922
#888	NaN	0.00912591
#889	NaN	0.00968362
#890	0.0101675	NaN
#891	NaN	0.0233006
#892	0.0304725	NaN
#893	0.0166362	NaN
#894	NaN	0.0442212
#895	0.01974	NaN
#896	0.03543	0.03543
#897	0.0379215	NaN
#898	NaN	0.0430242
#899	0.0314223	NaN
#900	NaN	0.0355898
#901	NaN	0.0647673
#902	0.069735	NaN
#903	0.17787	NaN
#904	NaN	0.0511105
#905	0.243641	NaN
#906	0.00782386	NaN
#907	0.00877929	NaN
#908	0.0135433	NaN
#909	0.00823867	NaN
#910	NaN	0.0200086
#911	0.0360202	NaN
#912	NaN	0.0271732
#913	NaN	0.0404925
#914	0.0815195	NaN
#915	NaN	0.00657333
#916	0.0152484	0.0152484
#917	0.01173	NaN
#918	NaN	0.0614641
#919	NaN	0.0860509
#920	0.0159296	NaN
#921	0.0320763	NaN
#922	0.00830316	NaN
#923	NaN	0.0223078
#924	0.0717117	NaN
#925	0.0430231	NaN
#926	0.0672938	NaN
#927	NaN	0.0434416
#928	0.0297958	NaN
#929	0.0391077	NaN
#930	NaN	0.0179244
#931	0.0676114	NaN
#932	0.0165488	NaN
#933	NaN	0.0339687
#934	NaN	0.037965
#935	NaN	0.0208636
#936	0.031154	NaN
#937	NaN	0.00971468
#938	0.047328	NaN
#939	NaN	0.0614671
#940	0.0453486	NaN
#941	0.0362301	0.0362301
#942	NaN	0.0295586
#943	0.0515226	NaN
#944	0.0426741	NaN
#945	NaN	0.0786611
#946	NaN	0.032895
#947	0.0505122	NaN
#948	0.0352055	NaN
#949	0.0194955	NaN
#950	0.0189048	0.0189048
#951	NaN	0.024465
#952	NaN	0.0306259
#953	0.0222553	NaN
#954	0.0670209	0.0670209
#955	0.100922	NaN
#956	0.0387345	NaN
#957	NaN	0.0053061
#958	NaN	0.0121354
#959	NaN	0.0484022
#960	NaN	0.0344148
#961	NaN	0.0498189
#962	0.0274904	NaN
#963	NaN	0.0272173
#964	0.0441281	0.0441281
#965	0.0713451	0.0713451
#966	NaN	0.0201396
#967	NaN	0.0476781
#968	NaN	0.0201396
#969	NaN	0.0476781
#970	NaN	0.0053061
#971	NaN	0.0121354
#972	NaN	0.0484022
#973	0.0344148	0.0344148
#974	NaN	0.0498189
#975	0.0274904	NaN
#976	NaN	0.0272173
#977	0.0441281	0.0441281
#978	0.0713451	0.0713451
#979	0.0796931	NaN
#980	0.1088	NaN
#981	0.103226	NaN
#982	0.0449498	NaN
#983	0.100922	NaN
#984	0.0430289	NaN
#985	NaN	0.0746625
#986	0.0549388	NaN
#987	0.053003	NaN
#988	NaN	0.0575611
#989	0.273623	NaN
#990	0.096963	NaN
#991	0.0858557	NaN
#992	0.0976346	NaN
#993	0.0477175	NaN
#994	NaN	0.0376444
#995	0.011475	NaN
#996	0.0146905	0.0146905
#997	0.0676114	NaN
#998	0.0711548	NaN
#999	0.0525867	NaN
#1000	0.0467992	0.0467992
#1001	NaN	0.0282483
#1002	0.0771639	NaN
#1003	0.192123	NaN
#1004	0.175094	NaN
#1005	0.244091	NaN
#1006	0.100922	NaN
#1007	0.05568	NaN
#1008	0.0470555	NaN
#1009	0.0318393	NaN
#1010	0.06327	NaN
#1011	0.0764858	0.0764858
#1012	0.0338405	0.0338405
#1013	0.00657333	NaN
#1014	0.0223078	NaN
#1015	0.0434416	0.0434416
#1016	0.0179244	NaN
#1017	0.0339687	NaN
#1018	0.037965	NaN
#1019	0.0208636	NaN
#1020	0.023358	0.023358
#1021	0.00971468	NaN
#1022	0.0614671	NaN
#1023	0.0295586	0.0295586
#1024	0.0786611	NaN
#1025	0.0376444	NaN
#1026	0.011475	NaN
#1027	0.0146905	NaN
#1028	0.0467992	NaN
#1029	0.0282483	0.0282483
