# Supplementary material for: Activity-dependent regulation of mitochondrial motility in developing cortical dendrites
Source: eLife. 2021 Sep 7;10:e62091. doi: 10.7554/eLife.62091 (PMC8423438; doi:10.7554/eLife.62091)
Supplement: Figure 2—source data 1. [file elife-62091-fig2-data1.xlsx]

## Sheet: Sheet1
Experiment	Age	Condition	Frq_global_ca_transients (#/min)	Mitos_moving %
30	6	awake	0.275	4.36708
36	6	awake	0.52	7.50946
38	6	awake	0.309091	2.32683
28	7	awake	0.245833	4.13951
37	7	awake	0.716667	1.74754
20	8	awake	0.8	1.19967
16	9	awake	1.5	0
18	9	awake	0.985714	0.57533
35	9	awake	0.8	1.91453
49	10	awake	0.577778	2.10534
17	11	awake	0.64	0.507443
24	11	awake	0.533333	1.1142
39	11	awake	0.615385	2.0984
