# Supplementary material for: Activity-dependent regulation of mitochondrial motility in developing cortical dendrites
Source: eLife. 2021 Sep 7;10:e62091. doi: 10.7554/eLife.62091 (PMC8423438; doi:10.7554/eLife.62091)
Supplement: Figure 2—source data 2. [file elife-62091-fig2-data2.xlsx]

## Sheet: Sheet1
		Before			After
Experiment	Age	Condition	Frq_global_ca_transients (#/min)	Mitos_moving %	Condition	Frq_global_ca_transients (#/min)	Mitos_moving %
38	6	Baseline, awake	0.309091	2.32683	TTX	0	3.25033
31	9	Baseline, under isoflurane	0.866667	1.04528	TTX	0	2.1816
29	10	Baseline, under isoflurane	0.811765	1.66318	TTX	0	4.74288
33	10	Baseline, under isoflurane	0.275	3.4637	TTX	0	2.45956
49	10	Baseline, awake	0.577778	2.10534	TTX	0	4.7468
25	11	Baseline, under isoflurane	0.475	1.29187	TTX	0	2.18703
39	11	Baseline, awake	0.615385	2.0984	TTX	0	4.24857
