# Supplementary material for: Activity-dependent regulation of mitochondrial motility in developing cortical dendrites
Source: eLife. 2021 Sep 7;10:e62091. doi: 10.7554/eLife.62091 (PMC8423438; doi:10.7554/eLife.62091)
Supplement: Figure 2—source data 4. [file elife-62091-fig2-data4.xlsx]

## Sheet: Sheet1
	120 s before	120 s after		p
Mean moving mitochondria (%)	4.00138	3.69093		0.332838
Sem	0.383189	0.361428
Transient #
#1	0	2.625
#2	0	0.740741
#3	0	8.85317
#4	0	1.2963
#5	21.9048	11.9444
#6	8.19328	5.81349
#7	2.75	2.16774
#8	0	2.5
#9	0	3.11012
#10	0	16.245
#11	0	1.04167
#12	0	2.32639
#13	2.86738	0
#14	14.0553	5.22222
#15	0	0.520833
#16	3.125	7.5
#17	4.65774	3.8373
#18	0.653595	1.11111
#19	2.94118	0
#20	5.34759	1.66667
#21	0	0.833333
#22	1.8018	0.740741
#23	0	4.25758
#24	5.36131	1.43939
#25	0	3.18452
#26	0	3.11012
#27	0	0.357143
#28	3.9899	2.22222
#29	2.03704	3.68056
#30	0	3.11012
#31	9.08055	3.57143
#32	12.9179	14.8313
#33	7.58929	10.0794
#34	3.57143	0.555556
#35	2.73438	2.42071
#36	0	0.357143
#37	12.619	2.37288
#38	1.33929	0.869565
#39	0	3.0303
#40	2.71547	2.70799
#41	8.125	1.85185
#42	2.40964	1.44345
#43	6.66954	11.8254
#44	3.05233	1.74731
#45	2.21415	3.33215
#46	0	0.178571
#47	0	0.648148
#48	0	0.178571
#49	2.80612	3.1893
#50	2.35828	2.57453
#51	2.72727	2.5
#52	3.38462	0
#53	0	2.15278
#54	2.9703	9.86722
#55	2.91262	2.27273
#56	2.83019	10.5431
#57	5.49191	0
#58	3.0752	4.02475
#59	1.76312	4.36465
#60	11.0986	14.4097
#61	2.51502	0
#62	3.30786	3.69835
#63	1.53509	2.5
#64	3.34928	1.75362
#65	3.43783	3.47763
#66	1.31827	0.520833
#67	0	0.833333
#68	2.625	2.86356
#69	1.875	2.08333
#70	7.5	5.83333
#71	1.45833	0.909091
#72	4.49405	0
#73	11.9862	8.67813
#74	0	0.178571
#75	3.66667	0
#76	7.17172	0
#77	9.74874	9.0131
#78	3.66667	0
#79	0.714286	2
#80	5.61673	8.5034
#81	2.91667	0
#82	0	3.75
#83	0.416667	0
#84	8.4678	3.84615
#85	2.16774	4.51128
#86	2.01389	2.75245
#87	10.1984	3.80159
#88	3.18452	0
#89	3.95833	1.88172
#90	2.94444	0
#91	10.1984	3.80159
#92	15.5853	14.0443
#93	0.833333	0
#94	5.66667	0
#95	1.59091	3.80786
#96	2.69231	3.40909
#97	0.833333	1.04167
#98	0.740741	1.36905
#99	3.18452	0
#100	0.757576	1.9697
#101	1.35417	0
#102	2.34631	7.14286
#103	3.66667	0
#104	7.00347	13.1915
#105	4.5383	1.66667
#106	0	0.178571
#107	0	0.648148
#108	11.9063	13.5218
#109	1.36364	1.41066
#110	18.3896	8.96296
#111	7.5	6.94444
#112	1.04167	1.79487
#113	1.85185	0
#114	9.43287	5.20833
#115	11.2708	11.0217
#116	6.40404	7.875
#117	0.648148	0
#118	4.8373	9.58207
#119	0	5.45139
#120	0	5.45139
#121	5.37252	9.10638
#122	0.178571	0
#123	1.44345	0
#124	1.25	0
#125	0.648148	0
#126	8.10606	6.81818
#127	3.80159	0
#128	3.92857	0
#129	15.0165	15.219
#130	1.58578	0
#131	0.648148	0
#132	12.8009	15.1235
#133	6.52778	0
#134	7.70833	12.5
#135	13.4155	8.45588
#136	17.7207	12.5
#137
#138
#139
#140
#141
#142
#143
#144
#145
#146
#147
#148
#149
#150
#151
#152
#153
#154
#155
#156
