# Supplementary material for: Activity-dependent regulation of mitochondrial motility in developing cortical dendrites
Source: eLife. 2021 Sep 7;10:e62091. doi: 10.7554/eLife.62091 (PMC8423438; doi:10.7554/eLife.62091)
Supplement: Figure 3—figure supplement 1—source data 2. [file elife-62091-fig3-figsupp1-data2.xlsx]

## Sheet: Sheet1
Time (s)	-119	-118	-117	-116	-115	-114	-113	-112	-111	-110	-109	-108	-107	-106	-105	-104	-103	-102	-101	-100	-99	-98	-97	-96	-95	-94	-93	-92	-91	-90	-89	-88	-87	-86	-85	-84	-83	-82	-81	-80	-79	-78	-77	-76	-75	-74	-73	-72	-71
mean moving mitos (%)	4.01081	3.86349	3.9316	3.96912	3.86123	3.93577	3.49759	3.69956	3.74452	3.82353	3.83115	3.80239	3.87728	4.40225	4.10074	3.92476	3.59216	3.29293	3.47024	3.52351	3.50523	3.47752	3.40563	3.50248	3.09036	3.53673	3.47435	4.17547	4.364	4.27083	4.10007	4.36441	4.35209	4.6141	4.4721	4.59441	4.59015	4.28862	4.33993	4.58047	4.70412	4.7589	4.57064	4.55693	4.27599	4.38848	4.41178	4.27319	4.25545
sem	0.604738	0.557266	0.554428	0.579007	0.585059	0.581383	0.53468	0.573955	0.55827	0.587704	0.598234	0.572101	0.573983	0.604999	0.577629	0.541558	0.528415	0.509207	0.528832	0.520129	0.509587	0.510842	0.506665	0.512116	0.485249	0.531404	0.54487	0.585643	0.584455	0.551582	0.574649	0.59873	0.610748	0.61498	0.604772	0.63918	0.672173	0.626825	0.586052	0.589881	0.576754	0.590919	0.573223	0.578388	0.550397	0.53266	0.536121	0.518705	0.520612
Transient #	Moving mitochondria (%)
#1	NaN	NaN	NaN	NaN	NaN	NaN	NaN	NaN	NaN	NaN	NaN	NaN	NaN	NaN	NaN	NaN	NaN	NaN	NaN	NaN	NaN	NaN	NaN	NaN	NaN	NaN	NaN	NaN	NaN	NaN	NaN	NaN	NaN	NaN	NaN	NaN	NaN	NaN	NaN	NaN	NaN	NaN	NaN	NaN	NaN	NaN	NaN	NaN	NaN
#2	NaN	NaN	NaN	NaN	NaN	NaN	NaN	NaN	NaN	NaN	NaN	NaN	NaN	NaN	NaN	NaN	NaN	NaN	NaN	NaN	NaN	NaN	NaN	NaN	NaN	NaN	NaN	NaN	NaN	NaN	NaN	NaN	NaN	NaN	NaN	NaN	NaN	NaN	NaN	NaN	NaN	NaN	NaN	NaN	NaN	NaN	NaN	NaN	NaN
#3	NaN	NaN	NaN	NaN	NaN	NaN	NaN	NaN	NaN	NaN	NaN	NaN	NaN	NaN	NaN	NaN	NaN	NaN	NaN	NaN	NaN	NaN	NaN	NaN	NaN	NaN	NaN	NaN	NaN	NaN	NaN	NaN	NaN	NaN	NaN	NaN	NaN	NaN	NaN	NaN	NaN	NaN	NaN	NaN	NaN	NaN	NaN	NaN	NaN
#4	NaN	NaN	NaN	NaN	NaN	NaN	NaN	NaN	NaN	NaN	NaN	NaN	NaN	NaN	NaN	NaN	NaN	NaN	NaN	NaN	NaN	NaN	NaN	NaN	NaN	NaN	NaN	NaN	NaN	NaN	NaN	NaN	NaN	NaN	NaN	NaN	NaN	NaN	NaN	NaN	NaN	NaN	NaN	NaN	NaN	NaN	NaN	NaN	NaN
#5	NaN	NaN	NaN	NaN	NaN	NaN	NaN	NaN	NaN	NaN	NaN	NaN	NaN	NaN	NaN	NaN	NaN	NaN	NaN	NaN	NaN	NaN	NaN	NaN	NaN	NaN	NaN	NaN	NaN	NaN	NaN	NaN	NaN	NaN	NaN	NaN	NaN	NaN	NaN	NaN	NaN	NaN	NaN	NaN	NaN	NaN	NaN	NaN	NaN
#6	NaN	NaN	NaN	NaN	NaN	NaN	NaN	NaN	NaN	NaN	NaN	NaN	NaN	NaN	NaN	NaN	NaN	NaN	NaN	NaN	NaN	NaN	NaN	NaN	NaN	NaN	NaN	NaN	NaN	NaN	NaN	NaN	NaN	NaN	NaN	NaN	NaN	NaN	NaN	NaN	NaN	NaN	NaN	NaN	NaN	NaN	NaN	NaN	NaN
#7	NaN	NaN	NaN	NaN	NaN	NaN	NaN	NaN	NaN	NaN	NaN	NaN	NaN	NaN	NaN	NaN	NaN	NaN	NaN	NaN	NaN	NaN	NaN	NaN	NaN	NaN	NaN	NaN	NaN	NaN	NaN	NaN	NaN	NaN	NaN	NaN	NaN	NaN	NaN	NaN	NaN	NaN	NaN	NaN	NaN	NaN	NaN	NaN	NaN
#8	NaN	NaN	NaN	NaN	NaN	NaN	NaN	NaN	NaN	NaN	NaN	NaN	NaN	NaN	NaN	NaN	NaN	NaN	NaN	NaN	NaN	NaN	NaN	NaN	NaN	NaN	NaN	NaN	NaN	NaN	NaN	NaN	NaN	NaN	NaN	NaN	NaN	NaN	NaN	NaN	NaN	NaN	NaN	NaN	NaN	NaN	NaN	NaN	NaN
#9	NaN	NaN	NaN	NaN	NaN	NaN	NaN	NaN	NaN	NaN	NaN	NaN	NaN	NaN	NaN	NaN	NaN	NaN	NaN	NaN	NaN	NaN	NaN	NaN	NaN	NaN	NaN	NaN	NaN	NaN	NaN	NaN	NaN	NaN	NaN	NaN	NaN	NaN	NaN	NaN	NaN	NaN	NaN	NaN	NaN	NaN	NaN	NaN	NaN
#10	NaN	NaN	NaN	NaN	NaN	NaN	NaN	NaN	NaN	NaN	NaN	NaN	NaN	NaN	NaN	NaN	NaN	NaN	NaN	NaN	NaN	NaN	NaN	NaN	NaN	NaN	NaN	NaN	NaN	NaN	NaN	NaN	NaN	NaN	NaN	NaN	NaN	NaN	NaN	NaN	NaN	NaN	NaN	NaN	NaN	NaN	NaN	NaN	NaN
#11	NaN	NaN	NaN	NaN	NaN	NaN	NaN	NaN	NaN	NaN	NaN	NaN	NaN	NaN	NaN	NaN	NaN	NaN	NaN	NaN	NaN	NaN	NaN	NaN	NaN	NaN	NaN	NaN	NaN	NaN	NaN	NaN	NaN	NaN	NaN	NaN	NaN	NaN	NaN	NaN	NaN	NaN	NaN	NaN	NaN	NaN	NaN	NaN	NaN
#12	NaN	NaN	NaN	NaN	NaN	NaN	NaN	NaN	NaN	NaN	NaN	NaN	NaN	NaN	NaN	NaN	NaN	NaN	NaN	NaN	NaN	NaN	NaN	NaN	NaN	NaN	NaN	NaN	NaN	NaN	NaN	NaN	NaN	NaN	NaN	NaN	NaN	NaN	NaN	NaN	NaN	NaN	NaN	NaN	NaN	NaN	NaN	NaN	NaN
#13	NaN	NaN	NaN	NaN	NaN	NaN	NaN	NaN	NaN	NaN	NaN	NaN	NaN	NaN	NaN	NaN	NaN	NaN	NaN	NaN	NaN	NaN	NaN	NaN	NaN	NaN	NaN	NaN	NaN	NaN	NaN	NaN	NaN	NaN	NaN	NaN	NaN	NaN	NaN	NaN	NaN	NaN	NaN	NaN	NaN	NaN	NaN	NaN	NaN
#14	NaN	NaN	NaN	NaN	NaN	NaN	NaN	NaN	NaN	NaN	NaN	NaN	NaN	NaN	NaN	NaN	NaN	NaN	NaN	NaN	NaN	NaN	NaN	NaN	NaN	NaN	NaN	NaN	NaN	NaN	NaN	NaN	NaN	NaN	NaN	NaN	NaN	NaN	NaN	NaN	NaN	NaN	NaN	NaN	NaN	NaN	NaN	NaN	NaN
#15	NaN	NaN	NaN	NaN	NaN	NaN	NaN	NaN	NaN	NaN	NaN	NaN	NaN	NaN	NaN	NaN	NaN	NaN	NaN	NaN	NaN	NaN	NaN	NaN	NaN	NaN	NaN	NaN	NaN	NaN	NaN	NaN	NaN	NaN	NaN	NaN	NaN	NaN	NaN	NaN	NaN	NaN	NaN	NaN	NaN	NaN	NaN	NaN	NaN
#16	NaN	NaN	NaN	NaN	NaN	NaN	NaN	NaN	NaN	NaN	NaN	NaN	NaN	NaN	NaN	NaN	NaN	NaN	NaN	NaN	NaN	NaN	NaN	NaN	NaN	NaN	NaN	NaN	NaN	NaN	NaN	NaN	NaN	NaN	NaN	NaN	NaN	NaN	NaN	NaN	NaN	NaN	NaN	NaN	NaN	NaN	NaN	NaN	NaN
#17	NaN	NaN	NaN	NaN	NaN	NaN	NaN	NaN	NaN	NaN	NaN	NaN	NaN	NaN	NaN	NaN	NaN	NaN	NaN	NaN	NaN	NaN	NaN	NaN	NaN	NaN	NaN	NaN	NaN	NaN	NaN	NaN	NaN	NaN	NaN	NaN	NaN	NaN	NaN	NaN	NaN	NaN	NaN	NaN	NaN	NaN	NaN	NaN	NaN
#18	NaN	NaN	NaN	NaN	NaN	NaN	NaN	NaN	NaN	NaN	NaN	NaN	NaN	NaN	NaN	NaN	NaN	NaN	NaN	NaN	NaN	NaN	NaN	NaN	NaN	NaN	NaN	NaN	NaN	NaN	NaN	NaN	NaN	NaN	NaN	NaN	NaN	NaN	NaN	NaN	NaN	NaN	NaN	NaN	NaN	NaN	NaN	NaN	NaN
#19	NaN	NaN	NaN	NaN	NaN	NaN	NaN	NaN	NaN	NaN	NaN	NaN	NaN	NaN	NaN	NaN	NaN	NaN	NaN	NaN	NaN	NaN	NaN	NaN	NaN	NaN	NaN	NaN	NaN	NaN	NaN	NaN	NaN	NaN	NaN	NaN	NaN	NaN	NaN	NaN	NaN	NaN	NaN	NaN	NaN	NaN	NaN	NaN	NaN
#20	NaN	NaN	NaN	NaN	NaN	NaN	NaN	NaN	NaN	NaN	NaN	NaN	NaN	NaN	NaN	NaN	NaN	NaN	NaN	NaN	NaN	NaN	NaN	NaN	NaN	NaN	NaN	NaN	NaN	NaN	NaN	NaN	NaN	NaN	NaN	NaN	NaN	NaN	NaN	NaN	NaN	NaN	NaN	NaN	NaN	NaN	NaN	NaN	NaN
#21	NaN	NaN	NaN	NaN	NaN	NaN	NaN	NaN	NaN	NaN	NaN	NaN	NaN	NaN	NaN	NaN	NaN	NaN	NaN	NaN	NaN	NaN	NaN	NaN	NaN	NaN	NaN	NaN	NaN	NaN	NaN	NaN	NaN	NaN	NaN	NaN	NaN	NaN	NaN	NaN	NaN	NaN	NaN	NaN	NaN	NaN	NaN	NaN	NaN
#22	NaN	NaN	NaN	NaN	NaN	NaN	NaN	NaN	NaN	NaN	NaN	NaN	NaN	NaN	NaN	NaN	NaN	NaN	NaN	NaN	NaN	NaN	NaN	NaN	NaN	NaN	NaN	NaN	NaN	NaN	NaN	NaN	NaN	NaN	NaN	NaN	NaN	NaN	NaN	NaN	NaN	NaN	NaN	NaN	NaN	NaN	NaN	NaN	NaN
#23	NaN	NaN	NaN	NaN	NaN	NaN	NaN	NaN	NaN	NaN	NaN	NaN	NaN	NaN	NaN	NaN	NaN	NaN	NaN	NaN	NaN	NaN	NaN	NaN	NaN	NaN	NaN	NaN	NaN	NaN	NaN	NaN	NaN	NaN	NaN	NaN	NaN	NaN	NaN	NaN	NaN	NaN	NaN	NaN	NaN	NaN	NaN	NaN	NaN
#24	NaN	NaN	NaN	NaN	NaN	NaN	NaN	NaN	NaN	NaN	NaN	NaN	NaN	NaN	NaN	NaN	NaN	NaN	NaN	NaN	NaN	NaN	NaN	NaN	NaN	NaN	NaN	NaN	NaN	NaN	NaN	NaN	NaN	NaN	NaN	NaN	NaN	NaN	NaN	NaN	NaN	NaN	NaN	NaN	NaN	NaN	NaN	NaN	NaN
#25	NaN	NaN	NaN	NaN	NaN	NaN	NaN	NaN	NaN	NaN	NaN	NaN	NaN	NaN	NaN	NaN	NaN	NaN	NaN	NaN	NaN	NaN	NaN	NaN	NaN	NaN	NaN	NaN	NaN	NaN	NaN	NaN	NaN	NaN	NaN	NaN	NaN	NaN	NaN	NaN	NaN	NaN	NaN	NaN	NaN	NaN	NaN	NaN	NaN
#26	NaN	NaN	NaN	NaN	NaN	NaN	NaN	NaN	NaN	NaN	NaN	NaN	NaN	NaN	NaN	NaN	NaN	NaN	NaN	NaN	NaN	NaN	NaN	NaN	NaN	NaN	NaN	NaN	NaN	NaN	NaN	NaN	NaN	NaN	NaN	NaN	NaN	NaN	NaN	NaN	NaN	NaN	NaN	NaN	NaN	NaN	NaN	NaN	NaN
#27	NaN	NaN	NaN	NaN	NaN	NaN	NaN	NaN	NaN	NaN	NaN	NaN	NaN	NaN	NaN	NaN	NaN	NaN	NaN	NaN	NaN	NaN	NaN	NaN	NaN	NaN	NaN	NaN	NaN	NaN	NaN	NaN	NaN	NaN	NaN	NaN	NaN	NaN	NaN	NaN	NaN	NaN	NaN	NaN	NaN	NaN	NaN	NaN	NaN
#28	NaN	NaN	NaN	NaN	NaN	NaN	NaN	NaN	NaN	NaN	NaN	NaN	NaN	NaN	NaN	NaN	NaN	NaN	NaN	NaN	NaN	NaN	NaN	NaN	NaN	NaN	NaN	NaN	NaN	NaN	NaN	NaN	NaN	NaN	NaN	NaN	NaN	NaN	NaN	NaN	NaN	NaN	NaN	NaN	NaN	NaN	NaN	NaN	NaN
#29	NaN	NaN	NaN	NaN	NaN	NaN	NaN	NaN	NaN	NaN	NaN	NaN	NaN	NaN	NaN	NaN	NaN	NaN	NaN	NaN	NaN	NaN	NaN	NaN	NaN	NaN	NaN	NaN	NaN	NaN	NaN	NaN	NaN	NaN	NaN	NaN	NaN	NaN	NaN	NaN	NaN	NaN	NaN	NaN	NaN	NaN	NaN	NaN	NaN
#30	NaN	NaN	NaN	NaN	NaN	NaN	NaN	NaN	NaN	NaN	NaN	NaN	NaN	NaN	NaN	NaN	NaN	NaN	NaN	NaN	NaN	NaN	NaN	NaN	NaN	NaN	NaN	NaN	NaN	NaN	NaN	NaN	NaN	NaN	NaN	NaN	NaN	NaN	NaN	NaN	NaN	NaN	NaN	NaN	NaN	NaN	NaN	0	0
#31	NaN	NaN	NaN	NaN	NaN	NaN	NaN	NaN	NaN	NaN	NaN	NaN	NaN	NaN	NaN	NaN	NaN	NaN	NaN	NaN	NaN	NaN	NaN	NaN	NaN	NaN	NaN	NaN	NaN	NaN	NaN	NaN	NaN	NaN	NaN	NaN	NaN	NaN	NaN	NaN	NaN	NaN	NaN	NaN	NaN	NaN	0	0	0
#32	NaN	NaN	NaN	NaN	NaN	NaN	NaN	NaN	NaN	NaN	NaN	NaN	NaN	NaN	NaN	NaN	NaN	NaN	NaN	NaN	NaN	NaN	NaN	NaN	NaN	NaN	NaN	NaN	NaN	NaN	NaN	NaN	NaN	NaN	NaN	NaN	NaN	NaN	NaN	NaN	NaN	NaN	NaN	NaN	NaN	6.25	6.25	6.25	6.25
#33	NaN	NaN	NaN	NaN	NaN	NaN	NaN	NaN	NaN	NaN	NaN	NaN	NaN	NaN	NaN	NaN	NaN	NaN	NaN	NaN	NaN	NaN	NaN	NaN	NaN	NaN	NaN	NaN	NaN	NaN	NaN	NaN	NaN	NaN	NaN	NaN	NaN	NaN	NaN	NaN	NaN	NaN	NaN	0	0	0	0	0	0
#34	NaN	NaN	NaN	NaN	NaN	NaN	NaN	NaN	NaN	NaN	NaN	NaN	NaN	NaN	NaN	NaN	NaN	NaN	NaN	NaN	NaN	NaN	NaN	NaN	NaN	NaN	NaN	NaN	NaN	NaN	NaN	NaN	NaN	NaN	NaN	NaN	NaN	NaN	NaN	NaN	NaN	0	0	0	6.66667	6.66667	6.66667	6.66667	6.66667
#35	NaN	NaN	NaN	NaN	NaN	NaN	NaN	NaN	NaN	NaN	NaN	NaN	NaN	NaN	NaN	NaN	NaN	NaN	NaN	NaN	NaN	NaN	NaN	NaN	NaN	NaN	NaN	NaN	NaN	NaN	NaN	NaN	NaN	NaN	NaN	NaN	NaN	NaN	0	0	0	0	10	10	10	10	0	0	0
#36	NaN	NaN	NaN	NaN	NaN	NaN	NaN	NaN	NaN	NaN	NaN	NaN	NaN	NaN	NaN	NaN	NaN	NaN	NaN	NaN	NaN	NaN	NaN	NaN	NaN	NaN	NaN	NaN	NaN	NaN	NaN	NaN	NaN	NaN	NaN	NaN	NaN	NaN	10	16.6667	16.6667	16.6667	9.09091	8.33333	8.33333	8.33333	8.33333	8.33333	8.33333
#37	NaN	NaN	NaN	NaN	NaN	NaN	NaN	NaN	NaN	NaN	NaN	NaN	NaN	NaN	NaN	NaN	NaN	NaN	NaN	NaN	NaN	NaN	NaN	NaN	NaN	NaN	NaN	NaN	NaN	NaN	NaN	NaN	NaN	NaN	NaN	NaN	NaN	NaN	0	0	0	0	0	0	0	0	0	0	0
#38	NaN	NaN	NaN	NaN	NaN	NaN	NaN	NaN	NaN	NaN	NaN	NaN	NaN	NaN	NaN	NaN	NaN	NaN	NaN	NaN	NaN	NaN	NaN	NaN	NaN	NaN	NaN	NaN	NaN	NaN	NaN	NaN	NaN	NaN	NaN	NaN	NaN	NaN	0	0	0	0	0	0	6.66667	6.66667	6.66667	6.66667	6.66667
#39	NaN	NaN	NaN	NaN	NaN	NaN	NaN	NaN	NaN	NaN	NaN	NaN	NaN	NaN	NaN	NaN	NaN	NaN	NaN	NaN	NaN	NaN	NaN	NaN	NaN	NaN	NaN	NaN	NaN	NaN	NaN	NaN	NaN	NaN	NaN	NaN	NaN	0	0	0	0	0	0	0	0	0	0	11.1111	12.5
#40	NaN	NaN	NaN	NaN	NaN	NaN	NaN	NaN	NaN	NaN	NaN	NaN	NaN	NaN	NaN	NaN	NaN	NaN	NaN	NaN	NaN	NaN	NaN	NaN	NaN	NaN	NaN	NaN	NaN	NaN	NaN	NaN	NaN	NaN	NaN	NaN	0	0	0	0	0	0	0	0	0	0	0	0	0
#41	NaN	NaN	NaN	NaN	NaN	NaN	NaN	NaN	NaN	NaN	NaN	NaN	NaN	NaN	NaN	NaN	NaN	NaN	NaN	NaN	NaN	NaN	NaN	NaN	NaN	NaN	NaN	NaN	NaN	NaN	NaN	NaN	NaN	NaN	NaN	10	16.6667	16.6667	16.6667	9.09091	8.33333	8.33333	8.33333	8.33333	8.33333	8.33333	8.33333	8.33333	8.33333
#42	NaN	NaN	NaN	NaN	NaN	NaN	NaN	NaN	NaN	NaN	NaN	NaN	NaN	NaN	NaN	NaN	NaN	NaN	NaN	NaN	NaN	NaN	NaN	NaN	NaN	NaN	NaN	NaN	NaN	NaN	NaN	NaN	NaN	NaN	NaN	0	0	0	0	0	0	0	0	0	0	0	0	0	0
#43	NaN	NaN	NaN	NaN	NaN	NaN	NaN	NaN	NaN	NaN	NaN	NaN	NaN	NaN	NaN	NaN	NaN	NaN	NaN	NaN	NaN	NaN	NaN	NaN	NaN	NaN	NaN	NaN	NaN	NaN	NaN	NaN	0	0	0	0	0	0	0	0	0	0	0	0	0	0	0	0	0
#44	NaN	NaN	NaN	NaN	NaN	NaN	NaN	NaN	NaN	NaN	NaN	NaN	NaN	NaN	NaN	NaN	NaN	NaN	NaN	NaN	NaN	NaN	NaN	NaN	NaN	NaN	NaN	NaN	0	0	0	0	0	0	0	0	0	0	0	0	0	0	0	0	0	0	0	0	0
#45	NaN	NaN	NaN	NaN	NaN	NaN	NaN	NaN	NaN	NaN	NaN	NaN	NaN	NaN	NaN	NaN	NaN	NaN	NaN	NaN	NaN	NaN	NaN	NaN	NaN	NaN	NaN	14.2857	12.5	12.5	0	0	0	0	0	0	0	0	0	0	12.5	12.5	12.5	0	0	0	0	12.5	12.5
#46	NaN	NaN	NaN	NaN	NaN	NaN	NaN	NaN	NaN	NaN	NaN	NaN	NaN	NaN	NaN	NaN	NaN	NaN	NaN	NaN	NaN	0	0	0	0	0	0	0	0	0	0	0	0	0	0	0	0	0	0	0	0	0	0	0	0	0	0	0	0
#47	NaN	NaN	NaN	NaN	NaN	NaN	NaN	NaN	NaN	NaN	NaN	NaN	NaN	NaN	NaN	NaN	0	0	0	0	0	0	0	0	0	0	0	0	0	0	0	0	0	0	0	0	0	0	0	0	0	0	0	0	0	0	0	0	0
#48	NaN	NaN	NaN	NaN	NaN	NaN	NaN	NaN	NaN	NaN	NaN	0	0	0	0	0	0	0	0	0	0	0	0	0	0	0	0	0	0	0	0	0	0	0	0	0	0	0	0	0	0	0	0	0	0	0	0	0	0
#49	NaN	NaN	NaN	NaN	NaN	NaN	NaN	NaN	NaN	0	0	0	0	0	0	0	0	0	0	0	0	0	0	0	0	0	0	0	8.33333	8.33333	8.33333	8.33333	8.33333	8.33333	8.33333	8.33333	8.33333	8.33333	8.33333	8.33333	8.33333	8.33333	8.33333	8.33333	8.33333	8.33333	8.33333	8.33333	8.33333
#50	NaN	NaN	NaN	NaN	NaN	NaN	NaN	0	0	0	0	0	0	0	0	0	0	0	0	0	0	0	0	0	0	0	0	0	0	0	0	0	0	0	0	0	0	0	0	0	0	0	0	0	0	0	0	0	0
#51	NaN	NaN	NaN	NaN	NaN	NaN	NaN	0	0	0	0	0	0	0	0	0	0	0	0	0	0	0	0	0	0	0	0	0	0	0	0	0	0	0	0	0	0	0	0	0	0	0	0	0	0	0	0	0	0
#52	6.66667	6.66667	6.66667	6.66667	6.66667	6.66667	6.66667	6.66667	6.66667	6.66667	6.66667	6.66667	6.66667	6.66667	6.66667	6.66667	6.66667	12.5	12.5	12.5	12.5	6.25	6.25	6.25	6.25	0	6.66667	6.66667	6.66667	6.66667	6.66667	6.66667	6.66667	6.66667	6.66667	6.66667	6.66667	6.66667	6.66667	6.66667	12.5	12.5	6.66667	6.66667	13.3333	13.3333	7.14286	7.14286	7.14286
#53	0	0	0	0	0	0	0	0	0	0	0	0	0	0	0	0	0	0	0	0	0	0	0	0	0	10	10	18.1818	18.1818	18.1818	10	18.1818	18.1818	18.1818	18.1818	18.1818	18.1818	18.1818	18.1818	18.1818	18.1818	18.1818	10	10	0	10	10	0	0
#54	12.5	12.5	12.5	0	0	0	0	0	0	0	0	0	0	0	0	0	0	0	0	0	0	0	0	0	0	0	0	12.5	12.5	12.5	12.5	12.5	12.5	12.5	12.5	12.5	0	0	0	0	0	0	0	0	0	0	0	0	0
#55	0	0	0	0	0	0	0	0	0	0	0	0	0	0	0	0	0	0	0	0	0	0	0	0	0	0	0	0	0	0	0	0	0	0	0	0	0	0	0	0	0	0	0	0	0	0	0	0	0
#56	0	0	0	0	0	0	0	0	0	0	0	0	0	0	0	0	0	0	0	0	0	0	0	0	0	0	0	0	0	0	0	0	0	0	0	0	0	0	0	0	5.55556	21.0526	21.0526	15.7895	15.7895	15.7895	15.7895	15.7895	11.1111
#57	0	0	0	0	0	0	0	0	0	0	0	0	0	0	0	0	0	0	0	0	0	0	0	0	0	0	0	0	0	0	0	0	0	0	0	0	0	0	0	0	0	0	0	0	0	0	0	0	0
#58	0	0	0	0	0	0	0	0	0	0	8.33333	8.33333	8.33333	8.33333	0	0	0	0	0	0	0	0	0	0	0	0	0	0	0	8.33333	8.33333	16.6667	16.6667	16.6667	8.33333	8.33333	8.33333	8.33333	8.33333	8.33333	8.33333	8.33333	0	0	0	0	0	0	0
#59	0	0	0	0	0	0	0	0	0	0	0	0	0	0	0	0	0	0	0	0	0	0	0	0	0	0	0	0	0	0	0	0	0	0	0	0	0	7.14286	7.14286	7.14286	7.14286	7.14286	7.14286	0	0	0	0	0	0
#60	0	0	0	0	0	0	0	0	0	0	0	0	0	0	0	0	0	0	0	0	0	0	0	0	0	0	0	0	0	0	0	0	0	0	0	0	0	0	0	0	0	0	0	0	0	0	0	0	0
#61	0	0	0	0	0	0	0	0	0	0	0	0	0	0	0	0	0	0	0	0	0	0	0	0	0	0	0	0	0	0	0	0	0	0	0	0	0	0	0	0	0	0	0	0	0	0	0	0	0
#62	0	0	0	0	0	0	0	0	0	0	0	0	0	0	0	0	0	0	0	0	0	0	0	0	0	0	0	0	0	0	0	0	0	0	0	0	0	0	0	0	0	0	0	0	0	0	0	0	0
#63	8.33333	8.33333	8.33333	8.33333	8.33333	8.33333	8.33333	16.6667	16.6667	16.6667	16.6667	16.6667	23.0769	23.0769	21.4286	15.3846	15.3846	7.69231	0	0	0	0	0	0	0	0	0	0	7.69231	7.69231	7.69231	7.69231	7.69231	7.69231	8.33333	15.3846	15.3846	15.3846	15.3846	15.3846	15.3846	15.3846	15.3846	15.3846	8.33333	8.33333	8.33333	8.33333	8.33333
#64	0	0	0	0	0	0	0	0	0	0	0	0	0	0	0	0	0	0	0	0	0	0	0	0	0	0	0	0	0	0	0	0	0	0	0	0	0	0	0	0	0	0	0	0	6.66667	6.66667	6.66667	6.66667	0
#65	0	0	0	11.1111	11.1111	11.1111	11.1111	11.1111	11.1111	11.1111	11.1111	0	0	0	0	0	0	0	0	0	11.1111	11.1111	11.1111	11.1111	11.1111	11.1111	0	0	0	0	0	0	0	0	0	0	0	0	0	0	0	0	0	0	0	0	0	0	0
#66	6.25	6.25	6.25	6.25	6.25	6.25	6.25	6.25	6.25	6.25	6.25	6.25	6.25	6.25	6.25	6.25	11.7647	11.7647	17.6471	17.6471	17.6471	17.6471	22.2222	22.2222	22.2222	22.2222	22.2222	22.2222	22.2222	22.2222	26.3158	26.3158	26.3158	26.3158	11.7647	11.7647	11.7647	11.7647	11.7647	11.7647	11.7647	11.7647	11.7647	11.7647	11.7647	0	0	0	0
#67	0	0	0	0	0	0	0	0	0	0	0	0	0	16.6667	16.6667	16.6667	16.6667	16.6667	16.6667	16.6667	16.6667	16.6667	16.6667	16.6667	16.6667	16.6667	16.6667	16.6667	16.6667	16.6667	16.6667	16.6667	16.6667	16.6667	16.6667	16.6667	16.6667	16.6667	16.6667	16.6667	16.6667	16.6667	16.6667	16.6667	16.6667	16.6667	16.6667	0	0
#68	0	0	0	0	0	0	0	0	0	0	0	0	0	0	0	0	0	0	0	0	0	0	0	0	0	0	0	0	0	0	0	0	0	0	0	0	0	0	0	0	0	0	0	0	0	0	0	0	0
#69	0	0	0	0	0	0	0	0	0	0	0	0	0	0	0	0	0	0	0	0	0	0	0	0	0	0	0	0	0	0	0	0	0	0	0	0	0	0	0	0	0	0	0	0	0	0	0	10	11.1111
#70	7.69231	7.69231	7.69231	7.69231	7.69231	7.69231	7.69231	7.69231	7.69231	7.69231	7.69231	7.69231	7.69231	7.69231	7.69231	7.69231	7.69231	7.69231	7.69231	7.69231	7.69231	7.69231	7.69231	7.69231	0	7.69231	7.69231	7.69231	7.69231	7.69231	7.69231	14.2857	14.2857	14.2857	14.2857	14.2857	14.2857	14.2857	14.2857	14.2857	14.2857	14.2857	14.2857	14.2857	0	0	7.14286	7.14286	7.14286
#71	0	0	0	0	0	0	0	0	0	0	0	0	0	0	0	0	0	0	7.14286	7.14286	7.14286	7.14286	7.14286	7.14286	0	0	0	0	0	0	0	0	0	0	0	0	0	0	0	0	0	0	0	0	0	0	0	0	0
#72	0	0	0	0	0	0	0	0	0	0	0	0	0	0	0	0	0	0	0	0	0	0	0	0	0	0	0	0	0	0	0	0	0	6.66667	6.66667	6.66667	6.66667	0	0	0	0	0	0	0	0	0	0	0	0
#73	10	10	10	10	10	10	0	0	0	0	0	0	0	0	0	0	0	0	0	0	0	0	0	0	0	0	0	0	0	0	0	0	0	0	0	0	0	0	10	10	10	10	10	0	0	0	0	0	0
#74	15.3846	15.3846	15.3846	15.3846	15.3846	15.3846	15.3846	15.3846	15.3846	15.3846	14.2857	20	20	20	20	20	14.2857	7.14286	6.66667	6.66667	6.66667	6.66667	6.66667	7.14286	7.69231	14.2857	14.2857	7.69231	7.69231	7.69231	7.69231	7.69231	21.4286	21.4286	21.4286	21.4286	21.4286	21.4286	15.3846	14.2857	14.2857	14.2857	14.2857	14.2857	14.2857	14.2857	14.2857	14.2857	7.69231
#75	10.5263	10.5263	10.5263	10.5263	15	15	15	15	10	10	10	10	15	15	15	15	15	15	21.0526	21.0526	21.0526	21.0526	16.6667	16.6667	16.6667	16.6667	5.88235	5.88235	5.88235	5.88235	0	0	0	0	0	0	0	0	0	5.55556	10.5263	10.5263	10.5263	5.55556	5.55556	5.55556	11.1111	11.7647	16.6667
#76	0	0	0	0	0	0	0	0	0	0	0	0	0	0	0	0	0	0	0	0	0	0	0	0	0	0	0	0	0	0	0	0	0	0	0	0	0	0	0	0	0	0	0	0	0	0	0	0	0
#77	0	0	7.14286	7.14286	7.14286	7.14286	7.69231	14.2857	14.2857	13.3333	13.3333	13.3333	13.3333	13.3333	13.3333	13.3333	20	20	20	20	14.2857	14.2857	14.2857	14.2857	7.69231	7.69231	7.14286	7.14286	14.2857	14.2857	20	13.3333	13.3333	13.3333	13.3333	20	25	29.4118	29.4118	29.4118	25	22.2222	26.3158	22.2222	22.2222	22.2222	22.2222	22.2222	21.0526
#78	7.69231	7.69231	0	0	0	0	0	0	7.69231	7.69231	7.69231	7.69231	7.69231	7.69231	7.69231	7.69231	7.69231	0	0	0	0	0	0	0	0	0	0	0	0	0	0	0	0	0	0	0	0	0	7.69231	7.69231	7.69231	7.69231	7.69231	7.69231	7.69231	7.69231	7.69231	7.69231	7.69231
#79	0	0	0	0	0	0	0	0	0	0	0	0	0	0	0	0	0	0	0	0	0	0	0	0	0	0	0	5.55556	10.5263	10.5263	10.5263	10.5263	10.5263	10.5263	10.5263	10.5263	10.5263	10.5263	10.5263	10.5263	10.5263	10.5263	10.5263	10.5263	5.55556	10.5263	10.5263	10.5263	10.5263
#80	10.5263	10.5263	10.5263	10.5263	10.5263	10.5263	10.5263	10.5263	10.5263	15.7895	15.7895	15.7895	15.7895	15.7895	5.88235	5.55556	5.55556	5.55556	5.55556	5.55556	5.55556	5.55556	5.55556	11.1111	11.1111	11.1111	15.7895	16.6667	16.6667	21.0526	21.0526	21.0526	21.0526	21.0526	21.0526	21.0526	25	25	21.0526	15	15	15	15	15	15	15	15	15	15
#81	0	0	0	0	0	0	0	0	0	0	0	0	0	0	0	0	0	0	0	6.25	6.66667	6.66667	6.66667	6.66667	6.66667	6.66667	6.66667	6.66667	6.66667	6.66667	0	0	0	0	0	0	0	0	0	0	0	0	0	0	0	0	0	0	0
#82	16.6667	16.6667	16.6667	16.6667	16.6667	16.6667	16.6667	16.6667	16.6667	16.6667	16.6667	16.6667	16.6667	16.6667	16.6667	16.6667	16.6667	16.6667	16.6667	16.6667	16.6667	16.6667	16.6667	16.6667	16.6667	16.6667	16.6667	16.6667	16.6667	16.6667	16.6667	16.6667	16.6667	16.6667	16.6667	16.6667	16.6667	16.6667	16.6667	16.6667	16.6667	16.6667	16.6667	16.6667	16.6667	16.6667	16.6667	16.6667	16.6667
#83	25	25	25	25	25	14.2857	0	0	0	0	0	0	0	0	0	0	0	0	0	0	0	0	0	0	0	0	0	0	0	0	0	0	0	0	0	0	0	0	0	0	0	0	0	0	0	0	14.2857	14.2857	14.2857
#84	0	0	0	0	0	0	0	0	0	0	0	0	0	0	0	0	0	0	0	0	0	0	0	0	0	0	0	0	0	0	0	0	0	0	0	0	0	0	0	0	0	0	0	0	0	0	0	0	0
#85	0	0	0	0	0	0	0	0	0	0	0	0	0	10	10	10	10	10	10	10	0	0	0	0	0	0	0	0	0	0	0	0	0	0	0	0	0	0	0	0	0	0	0	10	10	10	10	10	10
#86	0	0	0	0	0	0	0	0	0	0	0	0	0	0	0	0	0	0	0	0	0	0	0	0	0	0	0	0	0	0	0	0	0	0	0	0	0	0	0	0	0	0	0	0	0	0	0	0	0
#87	0	0	0	0	0	0	0	0	0	0	0	0	0	0	0	0	0	0	0	0	0	0	0	0	0	0	0	0	0	0	0	0	0	0	0	0	0	0	0	0	0	0	0	0	0	0	0	0	0
#88	0	0	0	0	0	0	0	0	0	0	0	0	0	0	0	0	0	0	0	0	0	0	0	0	0	0	0	0	0	0	0	0	0	0	0	0	0	0	0	0	0	0	0	0	0	0	0	0	0
#89	5.26316	5.26316	10.5263	10.5263	10.5263	10.5263	10.5263	10.5263	10.5263	10.5263	10.5263	10.5263	10.5263	10.5263	10.5263	10.5263	10.5263	10.5263	10.5263	15	10.5263	10.5263	10	5	5	5	0	0	0	0	5.26316	10	15	15	15	15	15	5.26316	5.26316	5.26316	5.26316	5.26316	5.55556	5.55556	5.55556	5.26316	5.26316	5.26316	0
#90	5.55556	5.55556	5.55556	0	0	0	0	0	0	0	0	5.26316	10.5263	15	15	14.2857	10	9.52381	9.52381	9.52381	9.52381	9.52381	9.52381	9.52381	9.52381	9.52381	9.09091	9.09091	9.09091	4.54545	0	0	0	0	0	0	0	0	0	0	0	0	0	0	0	0	4.54545	8.69565	9.09091
#91	0	0	0	0	0	0	0	0	0	0	0	0	0	0	0	0	0	0	0	0	0	0	0	0	0	0	0	0	0	0	0	0	0	0	0	0	0	0	0	0	0	0	0	0	0	0	0	0	0
#92	0	0	0	0	0	0	0	0	0	0	0	0	0	0	0	0	0	0	0	0	0	0	0	0	0	0	0	0	0	5.88235	5.88235	5.88235	5.88235	5.88235	5.88235	5.88235	5.88235	5.88235	5.88235	5.88235	5.88235	5.88235	5.88235	5.88235	5.88235	5.88235	5.88235	5.88235	5.88235
#93	0	0	0	0	0	0	0	0	0	0	0	0	0	0	0	0	0	0	0	0	0	0	0	0	0	0	0	0	0	0	0	0	0	0	0	0	0	0	0	0	0	0	0	0	0	0	0	0	0
#94	0	0	0	0	0	0	0	0	0	0	0	0	0	0	0	0	0	0	0	0	0	0	0	0	0	0	0	0	0	0	0	0	0	0	0	0	0	0	0	0	0	0	0	0	0	0	0	0	0
#95	0	0	0	0	0	0	0	0	0	0	0	0	0	0	0	0	0	0	0	0	0	0	0	0	0	0	0	0	0	0	0	0	0	0	0	0	0	0	0	0	0	0	0	0	0	0	0	0	0
#96	0	0	0	0	0	0	0	0	0	0	0	0	7.14286	7.14286	7.14286	7.14286	0	0	0	0	0	0	0	0	0	0	6.66667	6.66667	6.66667	6.66667	6.66667	6.66667	6.66667	6.66667	6.66667	6.66667	6.66667	6.66667	6.66667	6.66667	6.66667	6.66667	6.66667	6.66667	6.66667	0	0	0	0
#97	0	0	0	0	0	0	0	0	0	0	0	0	0	0	0	0	0	0	0	0	0	0	0	0	0	0	0	0	0	0	0	0	0	0	0	0	0	0	0	0	0	0	0	0	0	0	0	0	0
#98	10.5263	10.5263	10.5263	10.5263	10.5263	10.5263	10.5263	10.5263	10.5263	10.5263	10.5263	10.5263	10.5263	10.5263	10.5263	10.5263	5.55556	10.5263	10.5263	10.5263	10.5263	10.5263	10.5263	10.5263	10.5263	10.5263	10.5263	15	15	15	15	15	15	15	15	15	15	15	10	10	5	5	5	5	5	0	0	0	0
#99	0	0	0	11.1111	11.1111	11.1111	0	0	0	0	0	0	0	0	0	0	0	0	0	0	0	0	0	0	0	0	0	0	0	0	0	0	0	0	0	0	0	0	0	0	0	0	0	0	0	0	0	0	0
#100	12.5	12.5	13.3333	13.3333	13.3333	13.3333	7.14286	7.14286	7.14286	0	0	0	0	0	7.14286	7.14286	13.3333	13.3333	13.3333	13.3333	13.3333	13.3333	13.3333	13.3333	13.3333	13.3333	13.3333	13.3333	13.3333	13.3333	20	18.75	18.75	18.75	13.3333	18.75	18.75	18.75	13.3333	18.75	12.5	13.3333	18.75	18.75	18.75	13.3333	18.75	18.75	18.75
#101	0	0	0	0	0	0	0	0	0	0	0	0	0	0	0	0	0	0	0	0	0	0	0	0	0	0	0	0	0	0	0	0	6.66667	6.66667	6.66667	6.66667	6.66667	6.66667	6.66667	6.66667	6.66667	6.66667	6.66667	6.66667	6.66667	6.66667	0	0	0
#102	9.09091	9.09091	9.09091	9.09091	0	0	9.09091	9.09091	9.09091	16.6667	16.6667	16.6667	9.09091	16.6667	0	9.09091	9.09091	0	0	8.33333	8.33333	8.33333	8.33333	8.33333	8.33333	8.33333	8.33333	8.33333	8.33333	8.33333	8.33333	8.33333	8.33333	8.33333	8.33333	8.33333	0	0	0	18.1818	18.1818	18.1818	18.1818	18.1818	0	0	0	0	18.1818
#103	7.69231	7.69231	7.69231	7.69231	7.69231	14.2857	14.2857	14.2857	14.2857	14.2857	14.2857	14.2857	14.2857	14.2857	14.2857	14.2857	7.69231	7.69231	7.14286	7.14286	7.14286	0	0	0	0	0	0	0	0	0	0	0	0	0	0	0	0	0	0	0	0	0	0	0	0	0	0	6.66667	6.66667
#104	0	0	0	0	0	0	0	0	0	0	0	0	0	0	0	0	0	0	0	0	0	0	0	0	0	0	0	0	0	0	0	0	0	0	0	0	0	0	0	0	0	0	0	0	0	0	0	0	0
#105	0	0	0	0	0	0	0	0	0	0	0	0	0	0	0	0	0	0	0	0	0	0	0	0	0	0	0	0	0	0	0	0	0	5.88235	6.25	6.25	0	6.25	6.25	6.25	6.25	6.25	0	0	0	6.25	6.25	6.25	6.25
#106	0	0	0	0	0	0	0	0	0	0	0	0	0	0	0	0	0	0	0	0	0	0	0	0	0	0	0	0	0	0	0	0	0	0	0	0	0	0	0	0	0	0	0	0	0	0	0	0	0
#107	0	0	0	0	0	0	0	0	0	0	0	0	0	0	0	0	0	0	0	0	0	0	0	0	0	0	0	0	0	0	0	0	0	0	0	0	0	0	0	0	0	0	0	0	0	0	0	0	0
#108	0	0	0	0	0	0	0	0	0	0	0	0	0	0	0	0	0	0	0	0	0	0	0	0	0	0	0	0	0	0	0	0	0	0	0	0	0	0	0	0	0	0	0	0	0	0	0	0	0
#109	0	0	0	0	0	0	0	11.1111	11.1111	11.1111	11.1111	11.1111	11.1111	11.1111	11.1111	11.1111	11.1111	11.1111	0	0	0	0	0	0	0	0	0	0	0	0	0	0	0	0	0	0	0	0	11.1111	11.1111	11.1111	11.1111	11.1111	0	0	0	0	0	0
#110	0	0	0	0	0	0	0	0	0	0	0	0	0	0	0	0	0	0	0	0	0	0	0	0	0	0	0	0	0	0	0	0	0	12.5	12.5	0	0	0	0	0	11.1111	11.1111	11.1111	11.1111	11.1111	11.1111	11.1111	0	0
#111	6.25	6.25	6.25	6.25	6.25	6.25	6.25	6.25	6.25	6.25	6.25	6.25	6.25	6.25	11.7647	11.7647	11.7647	11.7647	11.7647	11.7647	11.7647	11.7647	5.88235	5.88235	5.88235	11.1111	11.7647	11.7647	11.7647	11.7647	11.7647	11.7647	11.7647	11.7647	11.7647	12.5	17.6471	17.6471	17.6471	17.6471	17.6471	17.6471	17.6471	17.6471	17.6471	17.6471	17.6471	17.6471	17.6471
#112	28.5714	15.3846	15.3846	21.4286	21.4286	26.6667	26.6667	31.25	26.6667	26.6667	33.3333	28.5714	21.4286	21.4286	15.3846	7.69231	7.69231	14.2857	14.2857	14.2857	15.3846	15.3846	8.33333	0	0	15.3846	15.3846	15.3846	15.3846	8.33333	8.33333	0	0	0	8.33333	8.33333	8.33333	8.33333	15.3846	15.3846	15.3846	15.3846	16.6667	23.0769	23.0769	23.0769	23.0769	16.6667	16.6667
#113	11.1111	11.1111	11.1111	11.1111	0	0	0	0	0	0	0	0	0	0	0	0	0	0	0	0	0	0	0	0	11.1111	11.1111	11.1111	11.1111	11.1111	0	0	0	0	0	0	0	0	0	0	0	0	0	0	0	0	0	0	0	0
#114	0	0	0	0	0	0	0	0	0	0	0	0	0	0	0	0	0	0	0	0	0	0	0	0	0	0	0	0	0	0	0	0	0	0	0	0	0	0	0	0	0	0	0	7.14286	7.14286	7.14286	7.14286	7.14286	7.14286
#115	14.2857	14.2857	14.2857	14.2857	7.14286	7.14286	7.14286	7.14286	7.14286	7.14286	7.14286	7.14286	7.14286	7.14286	7.14286	7.14286	7.14286	7.14286	7.14286	7.14286	7.14286	7.14286	7.14286	7.14286	7.14286	7.14286	7.14286	7.14286	7.14286	0	0	0	0	0	0	0	0	0	0	0	0	0	0	0	0	0	0	0	0
#116	14.2857	14.2857	14.2857	14.2857	14.2857	14.2857	14.2857	14.2857	14.2857	14.2857	14.2857	14.2857	14.2857	14.2857	14.2857	14.2857	14.2857	14.2857	14.2857	14.2857	14.2857	14.2857	14.2857	14.2857	7.14286	7.14286	7.14286	14.2857	14.2857	14.2857	14.2857	14.2857	14.2857	14.2857	14.2857	14.2857	14.2857	14.2857	14.2857	14.2857	14.2857	14.2857	14.2857	14.2857	14.2857	14.2857	7.69231	7.69231	7.69231
#117	14.2857	14.2857	7.69231	7.69231	0	7.69231	7.69231	7.69231	7.69231	7.69231	7.69231	7.69231	7.69231	7.69231	0	0	0	0	0	0	0	0	0	0	0	0	0	8.33333	8.33333	8.33333	8.33333	8.33333	8.33333	15.3846	15.3846	15.3846	15.3846	15.3846	15.3846	15.3846	15.3846	20	20	20	20	20	20	20	14.2857
#118	12.5	12.5	12.5	12.5	12.5	12.5	12.5	12.5	12.5	12.5	12.5	13.3333	13.3333	13.3333	13.3333	13.3333	13.3333	13.3333	13.3333	13.3333	13.3333	13.3333	17.6471	13.3333	18.75	18.75	23.5294	23.5294	18.75	18.75	18.75	13.3333	13.3333	13.3333	6.66667	6.66667	6.66667	6.66667	6.66667	6.66667	6.66667	6.66667	6.66667	0	0	0	0	0	0
#119	8.33333	8.33333	8.33333	16.6667	23.0769	23.0769	16.6667	16.6667	16.6667	16.6667	16.6667	16.6667	16.6667	23.0769	23.0769	23.0769	23.0769	16.6667	16.6667	9.09091	9.09091	16.6667	16.6667	16.6667	9.09091	8.33333	15.3846	23.0769	23.0769	16.6667	16.6667	16.6667	16.6667	8.33333	8.33333	8.33333	8.33333	8.33333	8.33333	8.33333	8.33333	8.33333	8.33333	16.6667	9.09091	9.09091	18.1818	18.1818	20
#120	0	0	0	0	0	0	0	0	0	0	0	0	0	0	0	0	0	0	0	0	0	0	0	0	0	0	0	7.14286	7.14286	7.14286	7.14286	7.14286	7.14286	7.14286	7.14286	7.14286	7.14286	7.14286	7.14286	7.14286	7.14286	0	0	0	0	0	0	0	0
#121	14.2857	14.2857	14.2857	0	14.2857	14.2857	14.2857	0	0	0	0	0	0	0	0	0	0	0	0	0	0	0	0	0	0	0	0	0	0	0	0	0	0	0	0	0	0	0	0	0	0	0	0	0	0	0	0	0	0
#122	0	0	0	0	0	0	0	0	0	0	0	0	0	0	0	0	0	0	7.69231	7.69231	7.69231	7.69231	7.69231	7.69231	7.69231	7.69231	7.69231	7.69231	7.69231	7.69231	7.69231	15.3846	7.69231	7.69231	0	0	0	0	0	0	0	0	0	0	0	7.69231	7.69231	0	0
#123	0	0	0	0	0	0	0	0	0	0	0	0	0	0	0	0	0	0	0	0	0	0	0	0	0	0	0	0	0	0	0	6.66667	6.25	11.1111	11.1111	11.1111	6.25	0	0	0	0	0	7.14286	7.14286	7.14286	7.14286	7.14286	7.14286	7.14286
#124	0	0	0	0	0	0	0	0	0	0	0	0	0	0	0	0	0	0	0	0	0	0	0	0	0	0	0	0	0	0	0	0	0	0	0	0	0	0	0	0	0	0	0	0	0	0	0	0	0
#125	0	0	0	0	0	0	0	0	0	0	0	0	0	0	0	0	0	0	0	0	0	0	0	0	0	0	0	0	0	0	0	0	0	0	0	0	0	0	0	0	0	0	0	0	0	0	0	0	0
#126	0	0	0	0	0	0	0	0	0	0	0	0	0	0	0	0	0	0	0	0	0	0	0	0	0	0	0	0	0	0	0	0	0	0	0	0	0	0	0	0	0	0	0	0	0	0	14.2857	14.2857	14.2857
#127	18.75	18.75	18.75	18.75	13.3333	12.5	12.5	12.5	11.7647	11.7647	6.25	6.25	11.7647	11.7647	11.7647	11.7647	11.7647	11.7647	11.7647	6.25	11.7647	11.7647	11.7647	11.7647	11.7647	17.6471	22.2222	22.2222	22.2222	12.5	16.6667	16.6667	16.6667	11.7647	11.1111	11.1111	15	10.5263	10.5263	10.5263	10	10.5263	10.5263	15	15	15	10.5263	10.5263	10.5263
#128	0	5	5	0	5	5	5	9.52381	10	10	15	15	15	10	10	10	5.26316	0	0	0	0	0	0	0	0	0	0	0	0	0	0	0	0	0	0	0	0	5.26316	5.55556	5.55556	5.55556	5.55556	0	0	0	0	0	0	0
#129	0	0	0	0	0	0	0	0	0	0	0	0	0	0	0	0	0	0	0	0	0	0	0	0	0	0	0	0	0	10	0	11.1111	11.1111	0	0	0	0	0	0	0	0	0	0	0	0	0	0	0	0
#130	10	10	10	10	10	10	10	0	0	0	0	0	0	0	0	0	0	0	0	0	0	0	0	10	10	0	0	0	0	0	0	0	0	0	0	0	0	0	0	9.09091	9.09091	9.09091	9.09091	9.09091	9.09091	9.09091	9.09091	9.09091	9.09091
#131	16.6667	9.09091	9.09091	16.6667	16.6667	16.6667	9.09091	8.33333	15.3846	23.0769	23.0769	16.6667	16.6667	16.6667	16.6667	8.33333	8.33333	8.33333	8.33333	8.33333	8.33333	8.33333	8.33333	8.33333	8.33333	16.6667	9.09091	9.09091	18.1818	18.1818	20	20	20	22.2222	30	36.3636	36.3636	22.2222	20	20	20	20	20	20	20	11.1111	10	10	10
#132	16.6667	16.6667	16.6667	11.7647	11.7647	11.7647	11.7647	11.7647	11.7647	11.7647	11.7647	11.7647	17.6471	12.5	11.7647	6.25	6.25	6.25	6.25	6.25	6.25	6.25	6.25	6.25	0	0	0	0	0	0	6.25	6.25	6.25	6.25	6.25	6.25	6.25	6.25	6.25	6.25	6.25	6.25	6.25	6.25	6.25	6.25	0	0	0
#133	0	0	0	8.33333	8.33333	8.33333	8.33333	8.33333	8.33333	8.33333	8.33333	8.33333	8.33333	8.33333	0	0	0	0	0	0	0	0	0	0	0	0	0	0	0	0	0	0	0	0	0	0	0	0	0	0	0	0	0	0	0	0	0	0	0
#134	0	0	0	0	0	0	0	0	0	0	0	0	0	0	0	0	0	0	0	0	0	0	0	0	0	0	0	0	0	0	0	0	0	0	0	0	0	0	0	0	0	0	0	0	0	0	0	0	0
#135	7.14286	7.14286	7.14286	7.14286	7.14286	7.14286	7.14286	7.14286	7.14286	7.14286	0	0	0	0	0	0	0	0	0	0	0	0	0	7.14286	7.14286	7.14286	7.14286	7.14286	7.14286	7.14286	7.14286	7.14286	7.14286	7.14286	7.14286	7.14286	7.14286	0	0	0	0	0	0	7.14286	7.14286	7.14286	7.14286	7.14286	7.14286
#136	0	0	0	0	0	0	0	7.14286	7.14286	7.14286	7.14286	7.14286	7.14286	7.14286	7.14286	7.14286	0	0	0	0	0	0	0	0	0	0	0	0	0	0	0	0	0	0	0	0	0	0	0	0	0	0	0	0	0	0	0	0	0
#137	7.14286	7.14286	7.14286	7.14286	7.14286	7.14286	7.14286	7.14286	7.14286	7.14286	7.14286	7.14286	0	0	0	0	0	0	0	0	0	0	0	0	0	0	0	0	0	0	0	0	0	0	0	0	7.69231	7.69231	7.69231	7.69231	0	0	0	0	0	0	0	0	0
#138	0	0	0	0	0	0	0	0	0	0	0	0	7.14286	7.14286	7.14286	7.14286	7.14286	0	0	0	0	0	0	0	0	0	0	7.14286	7.14286	7.14286	7.14286	7.14286	0	7.14286	7.14286	7.14286	7.14286	7.14286	7.14286	7.14286	7.14286	7.14286	7.14286	14.2857	14.2857	14.2857	14.2857	14.2857	14.2857
#139	6.25	6.25	6.25	0	0	0	0	0	0	0	0	0	0	0	0	0	0	0	6.25	6.25	6.25	6.25	6.25	6.25	6.25	6.25	6.25	6.25	6.25	6.25	6.25	0	0	0	0	0	0	0	0	0	0	0	5.88235	5.88235	5.88235	5.88235	5.88235	5.88235	5.88235
#140	7.14286	7.14286	7.14286	7.14286	0	0	0	0	0	0	0	0	0	0	0	0	0	0	0	0	0	0	0	0	0	0	0	0	7.69231	7.69231	7.69231	7.69231	0	0	0	0	0	0	0	0	0	0	0	0	0	0	0	0	0
#141	0	0	0	0	0	0	0	0	0	0	0	0	0	0	12.5	12.5	12.5	12.5	12.5	12.5	12.5	12.5	12.5	12.5	12.5	12.5	12.5	12.5	0	0	0	0	0	0	0	0	0	0	0	0	0	0	0	0	0	0	0	0	0
#142	0	0	0	0	0	0	0	0	0	0	0	0	0	0	0	0	0	0	0	0	0	0	0	0	0	0	0	0	0	0	0	0	0	0	0	0	0	0	0	0	0	0	0	0	0	7.14286	7.14286	7.14286	7.14286
#143	0	0	0	0	0	0	0	0	0	0	0	0	0	0	0	0	0	0	0	0	0	0	0	0	0	0	0	0	0	0	0	0	0	0	0	0	0	0	0	0	0	0	0	0	0	0	0	0	0
#144	0	0	0	0	0	0	0	0	0	0	0	0	0	0	0	0	0	0	0	0	0	6.66667	6.66667	6.66667	6.66667	6.66667	6.66667	6.66667	6.66667	6.66667	6.66667	6.66667	6.66667	6.66667	0	0	0	6.66667	6.66667	12.5	12.5	12.5	12.5	12.5	12.5	12.5	12.5	12.5	12.5
#145	6.66667	6.66667	6.66667	6.66667	6.66667	6.66667	6.66667	6.66667	6.66667	6.66667	6.66667	6.66667	6.66667	6.66667	6.66667	6.66667	6.66667	6.66667	6.66667	6.66667	6.66667	6.66667	6.66667	6.66667	6.66667	6.66667	6.66667	6.66667	6.66667	6.66667	6.66667	6.66667	6.66667	6.66667	6.66667	7.14286	13.3333	13.3333	13.3333	13.3333	13.3333	13.3333	7.14286	7.14286	7.14286	7.14286	7.14286	7.14286	7.14286
#146	0	0	0	0	0	0	0	0	0	0	0	0	0	11.1111	11.1111	11.1111	11.1111	11.1111	11.1111	11.1111	11.1111	11.1111	11.1111	11.1111	11.1111	11.1111	11.1111	11.1111	11.1111	11.1111	11.1111	11.1111	11.1111	12.5	22.2222	22.2222	22.2222	22.2222	22.2222	22.2222	22.2222	22.2222	12.5	12.5	0	0	0	0	0
#147	0	0	0	0	0	0	0	0	0	0	0	0	0	0	0	0	0	0	6.66667	6.66667	6.66667	6.66667	6.66667	6.66667	6.66667	6.66667	6.66667	6.66667	6.66667	6.66667	6.66667	0	0	0	6.66667	6.66667	12.5	12.5	12.5	12.5	12.5	12.5	12.5	12.5	12.5	12.5	12.5	12.5	12.5
#148	6.66667	6.66667	6.66667	6.66667	6.66667	6.66667	6.66667	6.66667	6.66667	6.66667	6.66667	6.66667	6.66667	6.66667	6.66667	6.66667	6.66667	6.66667	6.66667	6.66667	6.66667	6.66667	6.66667	6.66667	6.66667	6.66667	6.66667	6.66667	6.66667	6.66667	6.66667	6.66667	7.14286	13.3333	13.3333	13.3333	13.3333	13.3333	13.3333	7.14286	7.14286	7.14286	7.14286	7.14286	7.14286	7.14286	7.14286	7.14286	7.14286
#149	0	0	0	0	0	0	0	0	0	0	0	11.1111	11.1111	11.1111	11.1111	11.1111	0	0	0	0	0	0	0	0	0	0	0	0	0	0	0	0	0	0	0	0	0	0	0	0	0	0	0	0	0	0	0	0	0
#150	0	0	0	0	0	0	0	0	0	0	0	0	0	0	0	0	0	0	0	0	0	0	0	0	0	0	0	0	0	0	0	0	0	0	0	0	0	0	0	0	0	0	0	0	0	14.2857	14.2857	14.2857	14.2857
#151	0	0	0	0	0	0	0	0	0	0	0	0	0	0	0	0	0	0	0	0	0	0	0	0	0	0	0	0	0	0	0	0	0	0	0	0	0	0	0	0	0	0	0	0	0	0	0	0	0
#152	0	0	0	0	0	0	0	0	0	0	0	0	0	6.66667	6.66667	6.66667	6.66667	6.66667	6.66667	6.66667	6.66667	6.66667	6.66667	6.66667	6.66667	6.66667	0	0	0	6.66667	6.66667	12.5	12.5	12.5	12.5	12.5	12.5	12.5	12.5	12.5	12.5	12.5	12.5	12.5	12.5	12.5	6.66667	6.66667	6.66667
#153	0	0	0	0	0	0	0	0	0	0	0	0	0	0	0	0	0	0	0	0	0	0	0	0	0	0	0	0	0	0	0	0	0	0	0	0	0	0	0	0	0	0	0	14.2857	14.2857	14.2857	14.2857	14.2857	14.2857
#154	0	0	0	0	5.88235	5.88235	5.88235	17.6471	17.6471	17.6471	11.7647	11.7647	6.25	11.7647	12.5	12.5	12.5	12.5	12.5	12.5	12.5	12.5	13.3333	18.75	12.5	12.5	12.5	12.5	12.5	12.5	6.66667	12.5	12.5	13.3333	13.3333	12.5	12.5	6.25	6.25	6.25	6.25	6.25	6.25	6.66667	12.5	12.5	6.66667	6.66667	6.66667
#155	14.2857	14.2857	14.2857	14.2857	14.2857	14.2857	13.3333	13.3333	13.3333	13.3333	7.14286	7.14286	7.14286	7.14286	7.14286	7.14286	7.14286	7.14286	7.14286	7.14286	7.14286	0	0	0	0	0	0	0	0	0	0	0	0	0	0	0	0	0	0	0	0	0	0	0	0	0	0	0	0
#156	0	0	0	0	0	0	0	0	0	0	6.66667	6.66667	0	0	0	0	0	0	0	0	0	6.66667	6.66667	6.66667	0	0	0	6.66667	6.66667	6.66667	6.66667	6.66667	6.66667	6.66667	6.66667	6.66667	6.66667	0	0	0	0	0	0	0	6.66667	6.66667	6.66667	0	0
#157	0	0	0	0	0	0	0	0	0	0	0	0	0	0	0	0	0	0	0	0	0	0	0	0	0	0	0	0	0	0	0	0	0	0	0	0	0	0	0	0	0	0	0	0	0	0	0	0	0
#158	0	0	8.33333	8.33333	8.33333	8.33333	8.33333	8.33333	8.33333	8.33333	8.33333	8.33333	8.33333	8.33333	8.33333	8.33333	8.33333	8.33333	8.33333	8.33333	8.33333	8.33333	8.33333	8.33333	0	8.33333	8.33333	8.33333	8.33333	8.33333	8.33333	8.33333	8.33333	8.33333	8.33333	8.33333	0	0	0	0	0	0	0	0	0	0	0	0	0
[truncated: 191 more columns]
