# Supplementary material for: Activity-dependent regulation of mitochondrial motility in developing cortical dendrites
Source: eLife. 2021 Sep 7;10:e62091. doi: 10.7554/eLife.62091 (PMC8423438; doi:10.7554/eLife.62091)
Supplement: Figure 3—figure supplement 1—source data 3. [file elife-62091-fig3-figsupp1-data3.xlsx]

## Sheet: Sheet1
Time (s)	-119	-118	-117	-116	-115	-114	-113	-112	-111	-110	-109	-108	-107	-106	-105	-104	-103	-102	-101	-100	-99	-98	-97	-96	-95	-94	-93	-92	-91	-90	-89	-88	-87	-86	-85	-84	-83	-82	-81	-80	-79	-78	-77	-76	-75	-74	-73	-72	-71
mean moving mitos (%)	2.25892	2.26878	2.08136	2.32539	2.50453	2.31656	2.4761	2.63784	2.4173	2.53721	2.43451	2.13237	2.07004	2.14441	2.11673	2.07016	2.0529	2.18322	2.16441	2.18236	2.17463	2.18248	2.16157	2.28955	2.30615	2.61724	2.17925	2.24027	2.36127	2.29779	2.34624	2.69686	2.62009	2.45277	2.45226	2.46252	2.71696	2.50226	2.93175	2.64751	2.80761	2.93635	3.04792	3.16729	3.16068	3.15842	2.89612	2.83253	2.94391
sem	0.460447	0.482249	0.474183	0.557039	0.569794	0.542793	0.572122	0.68689	0.699711	0.715357	0.718047	0.601505	0.526326	0.49866	0.497044	0.432006	0.408293	0.418164	0.413915	0.437584	0.415513	0.417771	0.414225	0.455234	0.461336	0.508875	0.47653	0.458819	0.46602	0.473504	0.469475	0.542099	0.540836	0.533262	0.507593	0.601479	0.645462	0.622951	0.6525	0.560148	0.529933	0.521776	0.524973	0.54322	0.530818	0.521046	0.514026	0.590501	0.631291
Transient #	Moving mitochondria (%)
#1	NaN	NaN	NaN	NaN	NaN	NaN	NaN	NaN	NaN	NaN	NaN	NaN	NaN	NaN	NaN	NaN	NaN	NaN	NaN	NaN	NaN	NaN	NaN	NaN	NaN	NaN	NaN	NaN	NaN	NaN	NaN	NaN	NaN	NaN	NaN	NaN	NaN	NaN	NaN	NaN	NaN	NaN	NaN	NaN	NaN	NaN	NaN	NaN	NaN
#2	NaN	NaN	NaN	NaN	NaN	NaN	NaN	NaN	NaN	NaN	NaN	NaN	NaN	NaN	NaN	NaN	NaN	NaN	NaN	NaN	NaN	NaN	NaN	NaN	NaN	NaN	NaN	NaN	NaN	NaN	NaN	NaN	NaN	NaN	NaN	NaN	NaN	NaN	NaN	NaN	NaN	NaN	NaN	NaN	NaN	NaN	NaN	NaN	NaN
#3	NaN	NaN	NaN	NaN	NaN	NaN	NaN	NaN	NaN	NaN	NaN	NaN	NaN	NaN	NaN	NaN	NaN	NaN	NaN	NaN	NaN	NaN	NaN	NaN	NaN	NaN	NaN	NaN	NaN	NaN	NaN	NaN	NaN	NaN	NaN	NaN	NaN	NaN	NaN	NaN	NaN	NaN	NaN	NaN	NaN	NaN	NaN	NaN	NaN
#4	NaN	NaN	NaN	NaN	NaN	NaN	NaN	NaN	NaN	NaN	NaN	NaN	NaN	NaN	NaN	NaN	NaN	NaN	NaN	NaN	NaN	NaN	NaN	NaN	NaN	NaN	NaN	NaN	NaN	NaN	NaN	NaN	NaN	NaN	NaN	NaN	NaN	NaN	NaN	NaN	NaN	NaN	NaN	NaN	NaN	NaN	NaN	NaN	NaN
#5	NaN	NaN	NaN	NaN	NaN	NaN	NaN	NaN	NaN	NaN	NaN	NaN	NaN	NaN	NaN	NaN	NaN	NaN	NaN	NaN	NaN	NaN	NaN	NaN	NaN	NaN	NaN	NaN	NaN	NaN	NaN	NaN	NaN	NaN	NaN	NaN	NaN	NaN	NaN	NaN	NaN	NaN	NaN	NaN	NaN	NaN	NaN	NaN	NaN
#6	NaN	NaN	NaN	NaN	NaN	NaN	NaN	NaN	NaN	NaN	NaN	NaN	NaN	NaN	NaN	NaN	NaN	NaN	NaN	NaN	NaN	NaN	NaN	NaN	NaN	NaN	NaN	NaN	NaN	NaN	NaN	NaN	NaN	NaN	NaN	NaN	NaN	NaN	NaN	NaN	NaN	NaN	NaN	NaN	NaN	NaN	NaN	NaN	NaN
#7	NaN	NaN	NaN	NaN	NaN	NaN	NaN	NaN	NaN	NaN	NaN	NaN	NaN	NaN	NaN	NaN	NaN	NaN	NaN	NaN	NaN	NaN	NaN	NaN	NaN	NaN	NaN	NaN	NaN	NaN	NaN	NaN	NaN	NaN	NaN	NaN	NaN	NaN	NaN	NaN	NaN	NaN	NaN	NaN	NaN	NaN	NaN	NaN	NaN
#8	NaN	NaN	NaN	NaN	NaN	NaN	NaN	NaN	NaN	NaN	NaN	NaN	NaN	NaN	NaN	NaN	NaN	NaN	NaN	NaN	NaN	NaN	NaN	NaN	NaN	NaN	NaN	NaN	NaN	NaN	NaN	NaN	NaN	NaN	NaN	NaN	NaN	NaN	NaN	NaN	NaN	NaN	NaN	NaN	NaN	NaN	NaN	NaN	NaN
#9	NaN	NaN	NaN	NaN	NaN	NaN	NaN	NaN	NaN	NaN	NaN	NaN	NaN	NaN	NaN	NaN	NaN	NaN	NaN	NaN	NaN	NaN	NaN	NaN	NaN	NaN	NaN	NaN	NaN	NaN	NaN	NaN	NaN	NaN	NaN	NaN	NaN	NaN	NaN	NaN	NaN	NaN	NaN	NaN	NaN	NaN	NaN	NaN	NaN
#10	NaN	NaN	NaN	NaN	NaN	NaN	NaN	NaN	NaN	NaN	NaN	NaN	NaN	NaN	NaN	NaN	NaN	NaN	NaN	NaN	NaN	NaN	NaN	NaN	NaN	NaN	NaN	NaN	NaN	NaN	NaN	NaN	NaN	NaN	NaN	NaN	NaN	NaN	NaN	NaN	NaN	NaN	NaN	NaN	NaN	NaN	NaN	NaN	NaN
#11	NaN	NaN	NaN	NaN	NaN	NaN	NaN	NaN	NaN	NaN	NaN	NaN	NaN	NaN	NaN	NaN	NaN	NaN	NaN	NaN	NaN	NaN	NaN	NaN	NaN	NaN	NaN	NaN	NaN	NaN	NaN	NaN	NaN	NaN	NaN	NaN	NaN	NaN	NaN	NaN	NaN	NaN	NaN	NaN	NaN	NaN	NaN	NaN	NaN
#12	NaN	NaN	NaN	NaN	NaN	NaN	NaN	NaN	NaN	NaN	NaN	NaN	NaN	NaN	NaN	NaN	NaN	NaN	NaN	NaN	NaN	NaN	NaN	NaN	NaN	NaN	NaN	NaN	NaN	NaN	NaN	NaN	NaN	NaN	NaN	NaN	NaN	NaN	NaN	NaN	NaN	NaN	NaN	NaN	NaN	NaN	NaN	NaN	NaN
#13	NaN	NaN	NaN	NaN	NaN	NaN	NaN	NaN	NaN	NaN	NaN	NaN	NaN	NaN	NaN	NaN	NaN	NaN	NaN	NaN	NaN	NaN	NaN	NaN	NaN	NaN	NaN	NaN	NaN	NaN	NaN	NaN	NaN	NaN	NaN	NaN	NaN	NaN	NaN	NaN	NaN	NaN	NaN	NaN	NaN	NaN	NaN	NaN	NaN
#14	NaN	NaN	NaN	NaN	NaN	NaN	NaN	NaN	NaN	NaN	NaN	NaN	NaN	NaN	NaN	NaN	NaN	NaN	NaN	NaN	NaN	NaN	NaN	NaN	NaN	NaN	NaN	NaN	NaN	NaN	NaN	NaN	NaN	NaN	NaN	NaN	NaN	NaN	NaN	NaN	NaN	NaN	NaN	NaN	NaN	NaN	NaN	NaN	NaN
#15	NaN	NaN	NaN	NaN	NaN	NaN	NaN	NaN	NaN	NaN	NaN	NaN	NaN	NaN	NaN	NaN	NaN	NaN	NaN	NaN	NaN	NaN	NaN	NaN	NaN	NaN	NaN	NaN	NaN	NaN	NaN	NaN	NaN	NaN	NaN	NaN	NaN	NaN	NaN	NaN	NaN	NaN	NaN	NaN	NaN	NaN	NaN	NaN	NaN
#16	NaN	NaN	NaN	NaN	NaN	NaN	NaN	NaN	NaN	NaN	NaN	NaN	NaN	NaN	NaN	NaN	NaN	NaN	NaN	NaN	NaN	NaN	NaN	NaN	NaN	NaN	NaN	NaN	NaN	NaN	NaN	NaN	NaN	NaN	NaN	NaN	NaN	NaN	NaN	NaN	NaN	NaN	NaN	NaN	NaN	NaN	NaN	NaN	NaN
#17	NaN	NaN	NaN	NaN	NaN	NaN	NaN	NaN	NaN	NaN	NaN	NaN	NaN	NaN	NaN	NaN	NaN	NaN	NaN	NaN	NaN	NaN	NaN	NaN	NaN	NaN	NaN	NaN	NaN	NaN	NaN	NaN	NaN	NaN	NaN	NaN	NaN	NaN	NaN	NaN	NaN	NaN	NaN	NaN	NaN	NaN	NaN	NaN	NaN
#18	NaN	NaN	NaN	NaN	NaN	NaN	NaN	NaN	NaN	NaN	NaN	NaN	NaN	NaN	NaN	NaN	NaN	NaN	NaN	NaN	NaN	NaN	NaN	NaN	NaN	NaN	NaN	NaN	NaN	NaN	NaN	NaN	NaN	NaN	NaN	NaN	NaN	NaN	NaN	NaN	NaN	NaN	NaN	NaN	NaN	NaN	NaN	NaN	NaN
#19	NaN	NaN	NaN	NaN	NaN	NaN	NaN	NaN	NaN	NaN	NaN	NaN	NaN	NaN	NaN	NaN	NaN	NaN	NaN	NaN	NaN	NaN	NaN	NaN	NaN	NaN	NaN	NaN	NaN	NaN	NaN	NaN	NaN	NaN	NaN	NaN	NaN	NaN	NaN	NaN	NaN	NaN	NaN	NaN	NaN	NaN	NaN	NaN	NaN
#20	NaN	NaN	NaN	NaN	NaN	NaN	NaN	NaN	NaN	NaN	NaN	NaN	NaN	NaN	NaN	NaN	NaN	NaN	NaN	NaN	NaN	NaN	NaN	NaN	NaN	NaN	NaN	NaN	NaN	NaN	NaN	NaN	NaN	NaN	NaN	NaN	NaN	NaN	NaN	NaN	NaN	NaN	NaN	NaN	NaN	NaN	NaN	NaN	NaN
#21	NaN	NaN	NaN	NaN	NaN	NaN	NaN	NaN	NaN	NaN	NaN	NaN	NaN	NaN	NaN	NaN	NaN	NaN	NaN	NaN	NaN	NaN	NaN	NaN	NaN	NaN	NaN	NaN	NaN	NaN	NaN	NaN	NaN	NaN	NaN	NaN	NaN	NaN	NaN	NaN	NaN	NaN	NaN	NaN	NaN	NaN	NaN	NaN	NaN
#22	NaN	NaN	NaN	NaN	NaN	NaN	NaN	NaN	NaN	NaN	NaN	NaN	NaN	NaN	NaN	NaN	NaN	NaN	NaN	NaN	NaN	NaN	NaN	NaN	NaN	NaN	NaN	NaN	NaN	NaN	NaN	NaN	NaN	NaN	NaN	NaN	NaN	NaN	NaN	NaN	NaN	NaN	NaN	NaN	NaN	NaN	NaN	NaN	NaN
#23	NaN	NaN	NaN	NaN	NaN	NaN	NaN	NaN	NaN	NaN	NaN	NaN	NaN	NaN	NaN	NaN	NaN	NaN	NaN	NaN	NaN	NaN	NaN	NaN	NaN	NaN	NaN	NaN	NaN	NaN	NaN	NaN	NaN	NaN	NaN	NaN	NaN	NaN	NaN	NaN	NaN	NaN	NaN	NaN	NaN	NaN	NaN	NaN	NaN
#24	NaN	NaN	NaN	NaN	NaN	NaN	NaN	NaN	NaN	NaN	NaN	NaN	NaN	NaN	NaN	NaN	NaN	NaN	NaN	NaN	NaN	NaN	NaN	NaN	NaN	NaN	NaN	NaN	NaN	NaN	NaN	NaN	NaN	NaN	NaN	NaN	NaN	NaN	NaN	NaN	NaN	NaN	0	0	0	0	0	0	0
#25	NaN	NaN	NaN	NaN	NaN	NaN	NaN	NaN	NaN	NaN	NaN	NaN	NaN	NaN	NaN	NaN	NaN	NaN	NaN	NaN	NaN	NaN	NaN	NaN	NaN	NaN	NaN	NaN	NaN	NaN	NaN	NaN	NaN	NaN	NaN	NaN	NaN	NaN	NaN	NaN	NaN	0	0	0	0	0	0	0	0
#26	NaN	NaN	NaN	NaN	NaN	NaN	NaN	NaN	NaN	NaN	NaN	NaN	NaN	NaN	NaN	NaN	NaN	NaN	NaN	NaN	NaN	NaN	NaN	NaN	NaN	NaN	NaN	NaN	NaN	NaN	NaN	NaN	NaN	NaN	NaN	NaN	NaN	NaN	16.6667	16.6667	16.6667	16.6667	16.6667	16.6667	16.6667	16.6667	16.6667	11.1111	11.1111
#27	NaN	NaN	NaN	NaN	NaN	NaN	NaN	NaN	NaN	NaN	NaN	NaN	NaN	NaN	NaN	NaN	NaN	NaN	NaN	NaN	NaN	NaN	NaN	NaN	NaN	NaN	NaN	NaN	NaN	NaN	NaN	0	0	0	0	0	0	0	0	0	0	0	0	0	0	0	0	0	0
#28	NaN	NaN	NaN	NaN	NaN	NaN	NaN	NaN	NaN	NaN	NaN	NaN	NaN	NaN	NaN	NaN	NaN	NaN	NaN	NaN	NaN	NaN	NaN	NaN	NaN	NaN	NaN	NaN	NaN	0	0	0	0	0	0	0	0	5.55556	5.55556	5.55556	11.1111	11.1111	11.1111	11.1111	11.1111	11.1111	11.1111	0	0
#29	NaN	NaN	NaN	NaN	NaN	NaN	NaN	NaN	NaN	NaN	NaN	NaN	NaN	NaN	NaN	NaN	NaN	NaN	NaN	NaN	NaN	NaN	NaN	NaN	NaN	NaN	NaN	NaN	NaN	0	0	0	0	0	7.14286	7.14286	7.14286	7.14286	7.14286	7.14286	7.14286	7.14286	7.14286	7.14286	7.14286	7.14286	7.14286	7.14286	7.14286
#30	NaN	NaN	NaN	NaN	NaN	NaN	NaN	NaN	NaN	NaN	NaN	NaN	NaN	NaN	NaN	NaN	NaN	NaN	NaN	NaN	NaN	NaN	NaN	NaN	NaN	NaN	NaN	0	0	0	0	0	0	0	0	0	0	0	0	0	0	0	0	0	0	0	0	0	0
#31	NaN	NaN	NaN	NaN	NaN	NaN	NaN	NaN	NaN	NaN	NaN	NaN	NaN	NaN	NaN	NaN	NaN	NaN	NaN	NaN	NaN	NaN	NaN	NaN	NaN	NaN	0	0	0	0	0	0	0	0	0	0	0	0	0	0	0	6.25	6.25	6.25	6.25	6.25	0	0	6.25
#32	NaN	NaN	NaN	NaN	NaN	NaN	NaN	NaN	NaN	NaN	NaN	NaN	NaN	NaN	NaN	NaN	NaN	NaN	NaN	NaN	NaN	NaN	NaN	NaN	NaN	16.6667	16.6667	16.6667	16.6667	16.6667	16.6667	16.6667	16.6667	16.6667	11.1111	11.1111	11.1111	5.55556	5.55556	5.55556	5.55556	5.55556	5.55556	5.55556	5.55556	5.55556	5.55556	5.55556	5.55556
#33	NaN	NaN	NaN	NaN	NaN	NaN	NaN	NaN	NaN	NaN	NaN	NaN	NaN	NaN	NaN	NaN	NaN	5.55556	5.55556	5.55556	5.55556	5.55556	5.55556	5.55556	5.55556	5.55556	5.55556	5.55556	5.55556	0	0	0	0	0	0	0	0	0	0	0	0	0	0	0	0	0	0	0	0
#34	NaN	NaN	NaN	NaN	NaN	NaN	NaN	NaN	NaN	NaN	NaN	NaN	NaN	NaN	NaN	NaN	0	0	0	0	0	0	0	0	0	0	0	0	0	0	0	0	0	0	0	0	0	0	0	0	0	0	0	0	0	0	0	0	0
#35	NaN	NaN	NaN	0	0	0	0	0	0	0	0	0	0	0	0	0	0	0	0	0	0	0	0	0	0	0	0	0	0	0	0	0	0	0	0	0	0	0	0	0	0	0	0	0	0	0	0	0	0
#36	NaN	NaN	0	0	0	0	0	0	0	0	0	0	0	0	0	0	0	0	0	0	0	0	0	0	0	0	0	0	0	0	0	0	0	0	0	0	0	0	0	0	0	0	0	0	0	0	0	0	0
#37	5.55556	5.55556	5.55556	5.55556	5.55556	5.55556	5.55556	5.55556	5.55556	5.55556	0	0	0	0	0	0	0	0	0	0	0	0	0	0	0	0	0	0	0	0	0	0	0	0	0	0	0	0	0	0	0	0	0	0	0	0	0	0	0
#38	4.54545	4.54545	0	0	0	0	0	4.54545	4.54545	0	0	0	0	4.7619	4.7619	4.7619	4.7619	4.7619	0	0	0	0	0	0	0	0	0	0	0	4.7619	4.7619	9.09091	9.09091	13.0435	9.09091	9.09091	9.09091	9.09091	9.09091	4.7619	0	0	4.54545	4.54545	4.54545	4.54545	0	0	0
#39	6.66667	6.66667	6.66667	6.66667	6.66667	6.66667	6.66667	6.66667	6.66667	12.5	13.3333	13.3333	6.66667	6.66667	6.66667	0	0	0	0	0	0	0	0	0	0	0	0	0	0	0	0	0	0	0	0	0	7.14286	7.14286	7.14286	7.14286	7.14286	7.14286	7.14286	7.14286	7.14286	7.14286	7.14286	7.14286	7.14286
#40	8.33333	8.33333	8.33333	8.33333	8.33333	8.33333	8.33333	8.33333	8.33333	8.33333	0	0	0	0	0	0	0	0	0	0	0	0	0	0	0	0	0	0	0	0	0	0	8.33333	8.33333	8.33333	8.33333	8.33333	8.33333	8.33333	0	8.33333	8.33333	8.33333	8.33333	8.33333	8.33333	8.33333	8.33333	8.33333
#41	0	0	0	0	0	0	0	0	0	0	0	0	0	0	0	0	0	0	0	0	0	0	0	0	0	0	0	0	0	0	0	0	0	0	0	0	0	0	0	0	0	0	0	0	0	0	0	0	0
#42	0	0	0	0	0	0	0	0	0	0	0	0	0	0	0	0	0	0	0	0	0	0	0	0	0	0	0	0	0	0	0	0	0	0	0	0	0	0	0	0	0	0	0	0	0	0	0	0	0
#43	0	0	0	0	0	0	0	0	0	0	0	0	0	0	0	0	0	0	0	0	0	0	0	0	0	0	0	0	0	0	0	0	0	0	0	0	0	0	0	0	0	0	0	0	0	0	0	0	0
#44	4.7619	4.7619	4.7619	4.7619	0	0	0	0	0	0	0	0	0	0	0	4.7619	4.7619	9.09091	9.09091	13.0435	9.09091	9.09091	9.09091	9.09091	9.09091	4.7619	0	0	4.54545	4.54545	4.54545	4.54545	0	0	0	0	0	4.54545	4.54545	4.54545	4.54545	4.54545	4.54545	4.54545	4.54545	9.09091	9.09091	9.52381	5
#45	12.5	12.5	12.5	12.5	12.5	12.5	12.5	12.5	6.66667	0	0	0	0	0	0	0	0	0	0	0	0	0	0	0	0	0	0	0	0	0	0	0	0	0	0	0	0	0	0	0	6.25	6.25	6.25	6.25	6.25	6.25	6.25	6.25	6.25
#46	0	0	0	0	0	0	0	0	0	0	4.7619	4.7619	9.09091	9.09091	13.0435	9.09091	9.09091	9.09091	9.09091	9.09091	4.7619	0	0	4.54545	4.54545	4.54545	4.54545	0	0	0	0	0	4.54545	4.54545	4.54545	4.54545	4.54545	4.54545	4.54545	4.54545	9.09091	9.09091	9.52381	5	4.7619	4.7619	4.7619	9.09091	13.6364
#47	0	0	0	0	0	0	0	0	0	0	0	0	0	0	0	0	0	0	0	0	0	0	0	0	0	0	0	0	0	0	0	0	0	0	0	0	0	0	0	0	0	0	0	0	0	0	0	0	5.88235
#48	0	0	0	0	0	0	0	0	0	0	0	0	0	0	0	0	0	0	0	0	0	0	0	0	0	0	0	0	0	0	0	0	0	0	0	0	0	0	0	0	0	0	0	0	0	0	0	0	0
#49	0	8.33333	8.33333	8.33333	8.33333	8.33333	8.33333	8.33333	0	8.33333	8.33333	8.33333	8.33333	8.33333	8.33333	8.33333	8.33333	8.33333	8.33333	0	0	0	0	0	0	0	0	0	0	0	0	0	0	0	0	0	0	0	0	0	0	0	7.69231	7.69231	7.69231	0	0	0	0
#50	0	0	0	0	0	0	0	0	0	0	0	0	0	0	0	0	0	6.25	6.25	6.25	6.25	6.25	6.25	6.25	6.25	6.25	0	0	0	0	0	0	0	0	0	0	0	0	0	0	0	0	0	0	0	0	0	0	0
#51	0	0	0	0	0	0	0	0	0	0	0	0	0	0	0	0	0	0	0	0	0	0	0	0	0	0	0	0	0	0	0	0	0	0	0	0	0	0	0	0	0	0	0	0	0	0	0	0	0
#52	0	0	0	0	0	0	0	0	0	0	0	0	0	0	0	0	0	0	0	0	0	0	0	0	0	0	0	0	0	0	0	0	0	0	0	0	0	0	0	0	0	0	0	0	0	0	0	0	0
#53	0	0	0	0	0	0	0	0	0	0	0	0	0	0	0	0	0	0	0	0	0	0	0	0	0	0	0	0	0	0	0	0	0	0	0	0	0	0	0	0	0	0	0	0	0	0	0	0	0
#54	0	0	0	5	5	5	0	0	0	0	0	0	0	0	0	0	0	0	5	5	5	5	5	5	5	5	5	5	10	5.26316	5	5	5	5	5	5	5	5	5	5	5	5	5	5	5	5	5	5	5
#55	0	0	0	0	0	0	0	0	0	0	0	0	0	0	0	0	5.88235	5.88235	5.88235	5.88235	5.88235	5.88235	5.88235	5.88235	11.7647	11.7647	6.25	6.25	6.25	6.25	0	0	0	0	6.25	6.25	6.25	6.25	6.25	12.5	12.5	18.75	18.75	26.6667	26.6667	25	25	37.5	41.1765
#56	0	0	0	0	0	0	0	0	0	0	0	0	0	0	0	0	0	0	0	0	0	0	0	0	0	0	0	0	0	0	0	0	0	0	0	0	0	0	0	0	0	0	0	0	0	0	0	0	0
#57	0	0	0	0	0	0	0	0	0	5.55556	5.55556	5.55556	5.55556	5.55556	5.55556	5.55556	0	0	0	0	0	0	0	0	0	0	0	0	0	0	0	0	0	0	0	0	0	0	0	0	0	5	5	5.26316	5.26316	0	0	0	0
#58	0	0	0	0	5.88235	5.88235	5.88235	5.88235	5.88235	5.88235	5.88235	5.88235	11.7647	11.7647	6.25	6.25	6.25	6.25	0	0	0	0	6.25	6.25	6.25	6.25	6.25	12.5	12.5	18.75	18.75	26.6667	26.6667	25	25	37.5	41.1765	41.1765	41.1765	31.25	23.5294	18.75	18.75	12.5	6.66667	6.25	6.25	6.25	6.25
#59	0	0	0	0	0	0	0	0	0	0	0	0	0	0	0	0	0	0	0	0	0	0	0	0	0	0	0	0	0	0	0	0	0	0	0	0	0	0	0	0	0	0	0	0	0	0	0	0	0
#60	5	5	5	5	5	5	5	5	5	5	5	5	5	5	5	5	5	5	5	10	10	10	10	10	10	10	10	10	10	10	5.26316	5	0	5	5	5	5	5	5	5	5	5	5	5	5	5	5	5	5
#61	0	0	0	0	0	0	0	0	0	0	0	0	0	0	0	0	0	0	0	0	0	0	0	0	0	0	0	0	0	0	0	0	0	0	0	0	0	0	0	0	0	0	0	0	0	0	0	0	0
#62	0	0	0	0	0	0	0	0	0	0	0	0	0	0	0	0	0	0	0	0	0	0	0	0	0	5.55556	5.55556	5.55556	5.55556	5.88235	0	5.88235	5.88235	5.88235	5.88235	5.88235	5.88235	5.88235	11.1111	11.1111	11.1111	11.1111	11.1111	11.1111	11.1111	11.1111	11.1111	5.55556	5.55556
#63	0	0	0	0	0	0	0	0	0	0	0	0	0	0	0	5.88235	5.88235	5.88235	5.88235	5.88235	5.88235	5.88235	5.88235	5.88235	5.88235	5.88235	0	0	0	0	5.88235	5.88235	5.88235	5.88235	0	0	5.88235	5.88235	5.88235	5.88235	11.1111	11.1111	11.1111	11.1111	11.1111	11.1111	5.88235	5.88235	5.88235
#64	5	5	5	5	5	5	5	5	5	5	5	5	5	10	10	10	10	10	10	10	10	10	10	10	5.26316	5	0	5	5	5	5	5	5	5	5	5	5	5	5	5	5	5	5	5	5	5	5	5	5
#65	12.5	18.75	18.75	26.6667	26.6667	25	25	37.5	41.1765	41.1765	41.1765	31.25	23.5294	18.75	18.75	12.5	6.66667	6.25	6.25	6.25	6.25	6.25	6.25	18.75	18.75	18.75	18.75	13.3333	12.5	6.25	6.25	11.7647	11.7647	11.7647	11.7647	0	0	0	5.55556	5.55556	5.55556	5.55556	0	0	0	0	0	0	0
#66	6.66667	6.66667	6.66667	6.66667	6.66667	6.66667	6.66667	6.66667	6.66667	6.66667	6.66667	6.66667	6.66667	6.66667	6.66667	0	6.66667	6.66667	6.66667	6.66667	6.66667	6.66667	6.66667	6.66667	6.66667	12.5	6.66667	6.66667	6.66667	6.66667	6.66667	6.66667	6.66667	6.66667	0	6.66667	6.66667	6.66667	6.66667	6.66667	6.66667	6.66667	6.66667	6.66667	6.66667	6.66667	6.66667	6.66667	6.66667
#67	0	0	0	0	0	0	0	0	0	0	0	0	0	0	0	0	0	0	0	0	0	0	0	0	0	0	0	0	0	0	7.69231	7.69231	7.69231	7.69231	7.69231	7.69231	7.69231	0	7.69231	7.69231	7.69231	7.69231	7.69231	7.69231	7.69231	7.69231	7.69231	7.69231	7.69231
#68	0	0	0	0	0	0	0	0	0	0	0	0	0	0	0	0	0	0	0	0	0	0	0	0	0	0	0	0	0	0	0	0	0	0	0	0	0	0	0	0	0	0	0	0	0	0	0	0	0
#69	0	0	0	0	5.88235	5.88235	5.88235	5.88235	5.88235	5.88235	5.88235	5.88235	5.88235	5.88235	5.88235	0	0	0	0	5.88235	5.88235	5.88235	5.88235	0	0	5.88235	5.88235	5.88235	5.88235	11.1111	11.1111	11.1111	11.1111	11.1111	11.1111	5.88235	5.88235	5.88235	5.88235	5.88235	5.88235	5.88235	5.88235	5.88235	5.88235	5.88235	5.88235	5.88235	5.88235
#70	5	5	5	5	10	10	10	10	10	10	10	10	10	10	10	5.26316	5	0	5	5	5	5	5	5	5	5	5	5	5	5	5	5	5	5	5	5	5	5	5	5	5	5	9.52381	9.52381	9.52381	9.52381	9.52381	9.52381	9.52381
#71	0	0	0	0	0	0	0	0	0	0	0	0	0	0	0	0	0	0	0	0	0	0	0	0	0	0	0	0	0	0	0	0	0	0	0	0	0	0	0	0	0	0	0	0	0	0	0	0	0
#72	0	0	0	0	0	0	0	0	0	0	0	0	0	0	0	0	0	0	0	0	8.33333	9.09091	9.09091	9.09091	9.09091	9.09091	9.09091	9.09091	9.09091	9.09091	9.09091	9.09091	0	0	0	0	0	0	0	0	0	0	0	0	0	0	0	0	0
#73	0	0	0	0	0	0	0	0	0	0	0	0	0	0	0	0	0	0	0	0	0	0	0	0	0	0	0	0	0	0	0	0	0	0	0	0	0	0	0	0	0	0	0	0	0	0	0	0	0
#74	0	0	0	0	0	0	0	0	0	0	0	0	0	0	0	7.69231	7.69231	7.69231	7.69231	7.69231	7.69231	7.69231	0	7.69231	7.69231	7.69231	7.69231	7.69231	7.69231	7.69231	7.69231	7.69231	7.69231	7.69231	7.69231	7.69231	7.69231	7.69231	7.69231	7.69231	7.69231	7.69231	7.69231	7.69231	7.69231	7.69231	7.69231	7.69231	7.69231
#75	0	0	0	0	0	0	0	0	0	0	0	0	0	0	0	0	0	0	0	0	0	0	0	0	0	0	0	0	0	0	0	0	0	0	0	0	0	0	0	0	0	0	0	0	0	0	0	0	0
#76	0	0	0	0	0	0	0	0	0	0	0	0	0	0	0	0	0	0	0	0	0	0	0	0	0	0	0	0	0	0	0	0	0	0	0	0	0	0	0	0	0	0	0	0	0	0	0	0	0
#77	12.5	6.25	6.25	11.7647	11.7647	11.7647	11.7647	0	0	0	5.55556	5.55556	5.55556	5.55556	0	0	0	0	0	0	0	0	0	0	0	0	0	0	0	0	0	0	0	0	0	0	0	0	0	0	0	0	0	0	0	5.55556	5.88235	5.88235	5.88235
#78	6.66667	6.66667	6.66667	6.66667	6.66667	0	6.66667	6.66667	6.66667	6.66667	6.66667	6.66667	6.66667	6.66667	6.66667	6.66667	6.66667	6.66667	6.66667	6.66667	6.66667	6.66667	6.66667	6.66667	6.66667	6.66667	6.66667	6.66667	6.66667	6.66667	6.66667	6.66667	6.66667	6.66667	6.66667	0	0	0	0	0	0	0	0	0	0	0	0	0	0
#79	0	0	0	0	0	0	0	0	0	0	0	0	0	0	0	0	0	0	0	0	0	0	0	0	0	0	0	5.26316	5.26316	5.26316	5.26316	5.26316	5.26316	5.26316	5.26316	5.26316	5.26316	5.26316	5.26316	5.26316	5.26316	5.26316	5.26316	5.26316	5.26316	5.26316	5.26316	5.26316	5.26316
#80	5.55556	5.55556	0	0	0	0	0	5.55556	5.55556	5.55556	5.55556	0	0	0	0	5.55556	5.55556	5.88235	11.1111	11.1111	10.5263	10.5263	10.5263	5.26316	5.26316	0	0	0	0	0	0	5.26316	5.26316	5.26316	10.5263	10.5263	10.5263	5.26316	5.26316	0	0	0	0	0	0	0	0	0	0
#81	0	0	0	0	0	0	0	0	0	0	0	0	0	0	0	0	0	0	0	0	0	0	0	0	0	0	0	0	0	0	0	0	0	0	0	0	0	0	0	0	0	0	0	0	0	0	0	0	0
#82	7.69231	7.69231	7.69231	7.69231	7.69231	7.69231	7.69231	7.69231	7.69231	7.69231	7.69231	7.69231	7.69231	7.69231	7.69231	7.69231	7.69231	7.69231	7.69231	7.69231	7.69231	7.69231	7.69231	7.69231	7.69231	7.69231	7.69231	7.69231	7.69231	7.69231	7.69231	7.69231	7.69231	0	0	0	0	0	0	0	0	0	0	0	0	0	0	0	0
#83	0	0	0	0	0	0	0	0	0	0	0	0	0	0	0	0	0	0	0	0	0	0	0	0	0	0	0	0	0	0	0	0	0	0	0	0	0	0	0	0	0	0	0	0	0	0	0	0	0
#84	9.52381	9.52381	9.52381	9.52381	9.52381	5.26316	14.2857	14.2857	10	9.52381	4.7619	0	0	0	0	0	0	0	0	0	0	4.54545	4.54545	4.54545	4.54545	4.54545	4.54545	9.09091	9.09091	9.09091	9.09091	9.09091	9.09091	9.09091	4.7619	4.7619	0	0	0	0	0	0	0	0	0	4.7619	4.7619	4.7619	4.7619
#85	0	0	0	0	0	0	0	0	0	0	0	0	0	0	0	0	0	0	0	0	0	0	0	0	0	0	0	0	0	0	0	0	0	0	0	0	0	0	0	0	0	0	0	0	0	0	0	0	0
#86	0	0	0	0	0	0	0	0	0	0	0	0	0	0	0	0	0	0	0	0	0	0	0	0	0	0	0	0	0	0	0	0	0	0	0	0	0	0	0	0	0	0	0	0	0	0	0	0	0
#87	0	0	0	0	0	0	0	0	0	0	0	0	0	0	0	0	0	0	0	0	0	0	0	0	0	0	0	0	0	0	0	0	0	0	0	0	0	0	0	0	0	0	0	0	0	0	0	0	0
#88	0	0	0	0	0	0	0	0	0	0	0	0	0	0	0	0	0	0	0	0	0	0	0	0	0	0	0	0	0	0	0	0	0	0	0	0	0	0	0	0	0	0	0	0	0	0	0	0	0
#89	7.69231	0	0	0	0	0	0	0	0	0	0	0	0	0	0	0	0	0	0	0	0	0	0	0	0	0	0	0	0	0	0	0	0	0	0	0	7.14286	7.14286	7.14286	7.14286	7.14286	7.14286	7.14286	7.14286	7.14286	7.14286	7.14286	7.14286	7.14286
#90	0	0	0	0	0	0	0	0	0	0	0	0	0	0	0	0	0	0	0	0	0	0	0	0	0	0	0	0	0	0	0	0	0	0	0	0	0	0	0	0	0	0	0	0	0	0	0	0	0
#91	0	0	0	0	0	0	0	0	0	0	0	0	0	0	0	0	0	0	0	0	0	0	0	0	0	0	0	0	0	0	0	0	0	0	0	0	0	0	0	0	0	0	0	7.14286	7.14286	7.14286	7.14286	7.14286	7.14286
#92	0	0	0	0	0	0	0	0	0	0	0	0	0	0	0	0	0	0	0	0	0	0	0	0	0	0	0	0	0	0	7.14286	7.14286	7.14286	7.14286	7.14286	7.14286	7.14286	7.14286	7.14286	7.14286	7.14286	7.14286	7.14286	7.14286	7.14286	7.14286	7.14286	7.14286	0
#93	0	0	0	0	0	0	0	0	0	0	0	0	0	0	0	0	0	0	0	0	0	0	0	0	0	0	0	0	0	0	0	0	0	0	0	0	0	0	0	0	0	0	0	0	0	0	0	0	0
#94	5.88235	5.88235	5.88235	5.88235	5.88235	5.88235	5.88235	5.88235	5.88235	5.88235	11.7647	11.7647	11.7647	11.7647	11.7647	11.7647	11.7647	11.7647	6.25	6.25	6.25	6.25	6.25	6.25	6.25	6.25	6.25	6.25	6.25	6.25	6.25	6.25	6.25	6.25	6.25	6.25	6.25	6.25	6.25	6.25	6.25	6.25	6.25	6.25	6.25	6.25	6.25	6.25	6.25
#95	5.26316	5.26316	5.26316	5.26316	5.26316	5.26316	5.26316	5.26316	5.26316	5.26316	0	0	0	0	0	0	0	0	0	0	0	0	0	0	0	0	0	0	0	0	0	0	0	0	0	5.26316	5.26316	5.26316	5.26316	5.26316	0	0	0	0	0	0	0	0	0
#96	0	0	0	0	0	0	0	0	0	0	0	0	0	0	0	7.14286	7.14286	7.14286	7.14286	7.14286	7.14286	7.14286	7.14286	7.14286	7.14286	7.14286	7.14286	7.14286	7.14286	7.14286	7.14286	7.14286	7.14286	0	7.69231	7.69231	7.69231	0	0	0	0	0	0	0	0	0	0	0	0
#97	0	0	0	0	0	0	0	0	0	0	0	0	0	0	0	0	0	0	0	0	0	0	0	0	0	0	0	0	0	0	0	0	0	0	0	0	0	0	0	0	0	0	0	0	0	0	0	0	0
#98	0	0	0	0	0	0	0	0	0	0	0	0	0	0	0	0	0	0	0	0	0	0	0	0	0	0	0	0	0	0	0	0	0	0	0	0	0	0	0	0	0	0	0	4.7619	4.7619	4.7619	0	0	0
#99	0	0	0	0	0	0	0	0	0	0	0	0	0	0	5.26316	5.26316	5.26316	5.26316	5.26316	0	0	0	0	0	0	0	0	0	0	0	0	0	0	0	0	0	0	0	0	0	0	0	0	0	5.55556	5.55556	5.55556	5.55556	5.55556
#100	9.52381	9.52381	9.52381	9.52381	9.52381	9.52381	9.52381	9.52381	9.52381	9.52381	9.52381	9.52381	9.52381	9.52381	9.52381	9.52381	9.52381	9.52381	9.52381	9.52381	9.52381	9.52381	9.52381	4.7619	4.7619	4.7619	9.52381	5	5	5	5	5	5	0	0	0	0	0	0	0	0	0	0	0	0	0	0	0	0
#101	0	0	0	0	0	0	0	0	0	0	0	0	0	0	0	0	0	0	0	0	0	0	0	0	0	0	0	0	0	0	0	0	0	0	0	0	0	0	0	0	0	0	0	0	0	0	0	0	0
[truncated: 251 more columns]
