# Supplementary material for: Activity-dependent regulation of mitochondrial motility in developing cortical dendrites
Source: eLife. 2021 Sep 7;10:e62091. doi: 10.7554/eLife.62091 (PMC8423438; doi:10.7554/eLife.62091)
Supplement: Figure 3—figure supplement 1—source data 4. [file elife-62091-fig3-figsupp1-data4.xlsx]

## Sheet: Sheet1
Mitochondrion #	Mito_speed 2 min before	Mito_speed 2 min after
#1	NaN	0.582875
#2	NaN	0.461176
#3	NaN	0.211216
#4	0.333071	0.333071
#5	NaN	0.639497
#6	NaN	1.07162
#7	NaN	0.516601
#8	0.517324	0.517324
#9	NaN	0.0908377
#10	NaN	0.190327
#11	0.444095	0.444095
#12	NaN	0.322327
#13	NaN	0.532914
#14	NaN	0.88819
#15	NaN	0.380653
#16	NaN	0.555119
#17	0.832679	NaN
#18	0.256209	NaN
#19	0.599529	0.599529
#20	NaN	0.814175
#21	NaN	0.814175
#22	NaN	1.23712
#23	NaN	1.8081
#24	NaN	0.824748
#25	NaN	0.856469
#26	NaN	0.461176
#27	NaN	1.37392
#28	NaN	1.13244
#29	NaN	0.419025
#30	0.943702	0.943702
#31	1.4771	NaN
#32	0.711769	0.711769
#33	0.939737	0.939737
#34	NaN	1.03187
#35	NaN	1.14052
#36	NaN	1.442
#37	NaN	0.213166
#38	NaN	0.36162
#39	NaN	0.573908
#40	NaN	0.0876504
#41	NaN	0.210361
#42	NaN	0.358692
#43	NaN	0.488505
#44	NaN	0.548588
#45	NaN	0.819868
#46	0.488505	NaN
#47	NaN	0.362034
#48	NaN	0.256941
#49	NaN	0.740159
#50	NaN	0.651003
#51	NaN	0.680946
#52	NaN	0.883027
#53	NaN	0.967493
#54	NaN	0.666143
#55	NaN	0.856469
#56	NaN	0.416339
#57	0.569089	0.569089
#58	0.712701	0.712701
#59	NaN	0.10518
#60	NaN	0.532914
#61	0.266457	0.266457
#62	NaN	0.176732
#63	NaN	0.269292
#64	NaN	0.142745
#65	NaN	0.0908377
#66	0.190327	0.190327
#67	0.444095	NaN
#68	NaN	0.322327
#69	NaN	0.213166
#70	NaN	0.36162
#71	NaN	0.573908
#72	NaN	0.342073
#73	NaN	0.319193
#74	NaN	0.647639
#75	0.404054	0.404054
#76	0.989698	NaN
#77	NaN	0.623848
#78	NaN	0.707518
#79	NaN	0.666143
#80	0.193396	NaN
#81	NaN	0.666143
#82	0.666143	0.666143
#83	0.438252	NaN
#84	NaN	0.310867
#85	NaN	0.197376
#86	NaN	0.599529
#87	NaN	0.951633
#88	NaN	0.563659
#89	NaN	0.103094
#90	NaN	0.355276
#91	NaN	0.57098
#92	0.406185	NaN
#93	NaN	0.189325
#94	NaN	0.645326
#95	NaN	0.773585
#96	NaN	1.21117
#97	NaN	0.832679
#98	NaN	0.712618
#99	NaN	0.516026
#100	0.607366	NaN
#101	NaN	0.68664
#102	NaN	0.656627
#103	NaN	0.891607
#104	NaN	0.333071
#105	NaN	0.144814
#106	0.666143	NaN
#107	NaN	0.230588
#108	0.545026	NaN
#109	NaN	0.428235
#110	0.499607	NaN
#111	NaN	0.209359
#112	0.814175	NaN
#113	NaN	0.385662
#114	0.509403	NaN
#115	NaN	0.525902
#116	0.587773	NaN
#117	NaN	0.819868
#118	0.631083	NaN
#119	NaN	0.697864
#120	NaN	1.28788
#121	NaN	0.448132
#122	NaN	1.10058
#123	NaN	0.717385
#124	NaN	1.13636
#125	NaN	0.468767
#126	NaN	0.915946
#127	0.455782	NaN
#128	NaN	0.703497
#129	NaN	0.296063
#130	NaN	0.799371
#131	0.692789	NaN
#132	0.433767	NaN
#133	NaN	0.73855
#134	NaN	0.580189
#135	NaN	0.333071
#136	NaN	0.177638
#137	NaN	0.380653
#138	NaN	0.88819
#139	NaN	0.296063
#140	NaN	0.555119
#141	NaN	0.555119
#142	NaN	0.370079
#143	NaN	0.799371
#144	NaN	0.399686
#145	NaN	0.518111
#146	NaN	0.280481
#147	NaN	0.761306
#148	NaN	0.317211
#149	0.523398	NaN
#150	NaN	0.166536
#151	NaN	0.525902
#152	NaN	1.11024
#153	NaN	1.02949
#154	0.514747	NaN
#155	0.799371	NaN
#156	0.843781	0.843781
#157	NaN	0.472747
#158	NaN	0.832679
#159	NaN	0.350152
#160	NaN	1.70699
#161	NaN	0.751546
#162	NaN	0.9326
#163	NaN	0.882189
#164	NaN	1.02949
#165	1.38558	NaN
#166	NaN	0.704574
#167	1.02622	NaN
#168	NaN	0.619883
#169	NaN	0.481103
#170	NaN	0.333071
#171	NaN	0.876504
#172	NaN	1.11024
#173	NaN	1.50992
#174	0.404054	NaN
#175	0.284421	0.284421
#176	NaN	0.78726
#177	NaN	1.72413
#178	0.57098	NaN
#179	NaN	0.464055
#180	0.797187	NaN
#181	1.28104	NaN
#182	NaN	0.666143
#183	NaN	0.0951633
#184	NaN	0.252054
#185	NaN	0.819868
#186	1.33229	NaN
#187	NaN	1.19205
#188	NaN	0.321316
#189	NaN	1.30564
#190	NaN	0.666143
#191	NaN	0.545026
#192	1.03622	NaN
#193	0.825642	0.825642
#194	0.838847	NaN
#195	NaN	0.380653
#196	NaN	0.222048
#197	0.57098	NaN
#198	1.27436	NaN
#199	NaN	0.602701
#200	NaN	0.395522
#201	0.42189	NaN
#202	0.547189	NaN
#203	NaN	0.4681
#204	0.943702	NaN
#205	NaN	0.350602
#206	0.471851	NaN
#207	NaN	0.27756
#208	NaN	1.06583
#209	NaN	0.350602
#210	0.471851	NaN
#211	NaN	0.27756
#212	NaN	1.06583
#213	0.363351	NaN
#214	0.518111	NaN
#215	1.42745	NaN
#216	NaN	1.16248
#217	NaN	0.350602
#218	0.471851	NaN
#219	NaN	0.27756
#220	NaN	1.06583
#221	NaN	0.0979622
#222	NaN	0.602701
#223	NaN	0.395522
#224	0.42189	NaN
#225	0.547189	NaN
#226	NaN	0.4681
#227	0.943702	NaN
#228	NaN	1.4063
#229	NaN	1.99843
#230	0.0363351	NaN
#231	0.333071	NaN
#232	0.133229	NaN
#233	0.310867	0.310867
#234	0.518111	NaN
#235	NaN	0.590012
#236	NaN	0.635159
#237	NaN	0.444095
#238	NaN	0.610631
#239	NaN	0.504654
#240	NaN	0.946624
#241	NaN	0.88819
#242	NaN	0.444095
#243	NaN	0.555119
#244	NaN	0.181675
#245	NaN	0.629135
#246	NaN	0.550292
#247	NaN	0.795074
#248	NaN	0.0979622
#249	NaN	0.602701
#250	NaN	0.395522
#251	0.42189	NaN
#252	0.547189	NaN
#253	NaN	0.4681
#254	NaN	0.530195
#255	0.943702	NaN
#256	NaN	0.0951633
#257	0.621733	0.621733
#258	NaN	0.973593
#259	NaN	0.532914
#260	NaN	0.289627
#261	0.523398	NaN
#262	NaN	0.366379
#263	NaN	0.57098
#264	NaN	0.621733
#265	NaN	0.973593
#266	0.428235	NaN
#267	NaN	0.973593
#268	0.387881	NaN
#269	0.925198	0.925198
#270	0.780339	NaN
#271	NaN	0.0979622
#272	NaN	0.602701
#273	NaN	0.395522
#274	0.42189	NaN
#275	0.547189	NaN
#276	NaN	0.4681
#277	NaN	0.530195
#278	0.943702	NaN
#279	NaN	0.280481
#280	0.333071	NaN
#281	NaN	0.434441
#282	NaN	0.322327
#283	0.155129	0.155129
#284	NaN	0.29037
#285	NaN	0.269292
#286	NaN	0.269019
#287	NaN	0.55956
#288	NaN	0.693899
#289	NaN	0.826017
#290	0.592127	NaN
#291	NaN	0.296868
#292	0.799371	NaN
#293	NaN	0.799371
#294	NaN	0.202222
#295	0.692266	NaN
#296	NaN	0.752495
#297	NaN	0.834899
#298	1.13835	NaN
#299	NaN	0.432017
#300	NaN	0.968374
#301	NaN	0.66303
#302	NaN	0.28549
#303	NaN	0.142745
#304	0.0908377	NaN
#305	NaN	0.88819
#306	0.190327	NaN
#307	0.444095	NaN
#308	NaN	0.322327
#309	NaN	0.333071
#310	NaN	0.177638
#311	NaN	0.380653
#312	0.88819	NaN
#313	NaN	0.296063
#314	NaN	0.555119
#315	0.555119	NaN
#316	NaN	0.370079
#317	NaN	0.499607
#318	NaN	0.799371
#319	0.399686	NaN
#320	NaN	0.518111
#321	NaN	0.280481
#322	NaN	0.761306
#323	NaN	0.317211
#324	0.523398	NaN
#325	0.166536	NaN
#326	NaN	0.370079
#327	NaN	0.525902
#328	1.11024	NaN
#329	1.02949	NaN
#330	0.514747	NaN
#331	0.799371	NaN
#332	0.843781	NaN
#333	0.472747	NaN
#334	NaN	0.832679
#335	NaN	0.88819
#336	NaN	0.350152
#337	NaN	1.70699
#338	NaN	0.751546
#339	NaN	0.9326
#340	NaN	0.882189
#341	1.02949	NaN
#342	1.38558	NaN
#343	NaN	0.704574
#344	1.02622	NaN
#345	NaN	0.619883
#346	NaN	0.832679
#347	NaN	0.740159
#348	NaN	0.548588
#349	0.436438	0.436438
#350	0.69945	NaN
#351	NaN	0.697864
#352	NaN	0.945493
#353	0.296063	NaN
#354	NaN	0.666143
#355	NaN	0.856469
#356	NaN	0.799371
#357	0.692789	NaN
#358	0.433767	NaN
#359	NaN	0.721655
#360	0.73855	NaN
#361	0.580189	0.580189
#362	1.49882	NaN
#363	NaN	0.203544
#364	NaN	0.799371
#365	NaN	0.0974843
#366	0.470218	NaN
#367	0.461176	NaN
#368	NaN	0.555119
#369	NaN	0.555119
#370	NaN	0.139808
#371	NaN	0.707777
#372	0.683673	NaN
#373	NaN	1.09824
#374	NaN	0.31859
#375	NaN	0.376516
#376	NaN	0.333071
#377	NaN	0.177638
#378	NaN	0.380653
#379	0.88819	NaN
#380	NaN	0.296063
#381	NaN	0.555119
#382	0.555119	NaN
#383	NaN	0.370079
#384	NaN	0.499607
#385	NaN	0.799371
#386	0.399686	NaN
#387	NaN	0.666143
#388	NaN	0.518111
#389	NaN	0.280481
#390	NaN	0.761306
#391	NaN	0.317211
#392	0.523398	NaN
#393	0.166536	NaN
#394	NaN	0.370079
#395	NaN	0.525902
#396	1.11024	NaN
#397	1.02949	NaN
#398	0.514747	NaN
#399	0.799371	NaN
#400	0.843781	NaN
#401	0.472747	NaN
#402	0.832679	0.832679
#403	NaN	0.88819
#404	0.350152	0.350152
#405	NaN	1.70699
#406	NaN	0.751546
#407	NaN	0.9326
#408	NaN	0.882189
#409	1.02949	NaN
#410	1.38558	NaN
#411	NaN	0.704574
#412	1.02622	NaN
#413	NaN	0.619883
#414	NaN	0.832679
#415	NaN	0.0201861
#416	NaN	0.0999214
#417	NaN	0.190327
#418	NaN	0.245421
#419	NaN	0.211216
#420	NaN	0.333071
#421	0.118954	NaN
#422	NaN	0.261699
#423	0.470218	NaN
#424	NaN	0.509403
#425	0.174726	NaN
#426	0.88819	NaN
#427	NaN	0.423909
#428	NaN	0.450097
#429	NaN	1.23712
#430	NaN	1.01881
#431	0.327016	NaN
#432	NaN	1.63508
#433	NaN	0.425198
#434	NaN	0.860435
#435	NaN	0.950364
#436	NaN	1.14782
#437	0.666143	NaN
#438	NaN	0.222048
#439	NaN	0.107442
#440	0.605584	NaN
#441	1.46551	NaN
#442	2.26489	NaN
#443	1.66536	NaN
#444	1.48032	NaN
#445	NaN	0.836949
#446	NaN	1.09005
#447	NaN	0.0317211
#448	NaN	0.102484
#449	NaN	1.13042
#450	0.461176	NaN
#451	0.550292	NaN
#452	0.312679	NaN
#453	0.681112	NaN
#454	1.09005	NaN
#455	NaN	0.0999214
#456	NaN	0.190327
#457	NaN	0.245421
#458	NaN	0.211216
#459	NaN	0.352664
#460	0.289627	NaN
#461	NaN	1.59874
#462	0.962206	NaN
#463	0.156127	NaN
#464	0.629135	NaN
#465	0.459409	NaN
#466	NaN	0.423909
#467	0.862067	NaN
#468	2.55355	NaN
#469	0.37849	NaN
#470	NaN	0.37304
#471	0.687631	NaN
#472	NaN	0.647639
#473	1.11024	NaN
#474	NaN	0.410636
#475	0.905271	NaN
#476	NaN	1.7088
#477	0.520424	0.520424
#478	1.14403	NaN
#479	0.0363351	NaN
#480	0.333071	NaN
#481	0.133229	NaN
#482	0.310867	NaN
#483	0.518111	NaN
#484	0.590012	NaN
#485	NaN	0.945493
#486	0.635159	0.635159
#487	NaN	0.57098
#488	0.124902	0.124902
#489	0.856469	NaN
#490	1.01881	NaN
#491	0.85993	NaN
#492	NaN	0.222048
#493	NaN	0.302792
#494	NaN	0.808888
#495	NaN	0.645957
#496	0.617401	0.617401
#497	0.0740159	NaN
#498	0.380653	NaN
#499	NaN	0.484468
#500	NaN	0.161489
#501	NaN	0.666143
#502	0.266457	NaN
#503	NaN	1.2847
#504	1.25827	NaN
#505	0.749411	NaN
#506	NaN	0.333071
#507	NaN	0.761306
#508	NaN	0.333071
#509	NaN	0.523398
#510	0.344557	0.344557
#511	NaN	0.749411
#512	0.612851	NaN
#513	NaN	1.09438
#514	0.513882	NaN
#515	0.666143	NaN
#516	0.547717	NaN
#517	NaN	1.36401
#518	NaN	0.617696
#519	NaN	1.52658
#520	NaN	0.867374
#521	0.666143	NaN
#522	0.0512418	NaN
#523	NaN	0.0951633
#524	NaN	0.666143
#525	0.88819	NaN
#526	0.666143	NaN
#527	NaN	0.416339
#528	0.302792	NaN
#529	NaN	0.475816
#530	NaN	0.399686
#531	0.28549	NaN
#532	NaN	0.310867
#533	0.88819	NaN
#534	NaN	0.749411
#535	0.229704	NaN
#536	0.563659	NaN
#537	NaN	0.420722
#538	0.618561	NaN
#539	NaN	0.550292
#540	0.464281	NaN
#541	0.584906	NaN
#542	0.899293	NaN
#543	0.509403	NaN
#544	NaN	0.12336
#545	NaN	0.0740159
#546	NaN	0.333071
#547	NaN	0.761306
#548	NaN	0.333071
#549	NaN	0.523398
#550	0.344557	0.344557
#551	NaN	0.749411
#552	0.612851	NaN
#553	NaN	1.09438
#554	0.513882	NaN
#555	0.666143	NaN
#556	0.547717	NaN
#557	NaN	1.36401
#558	NaN	0.617696
#559	NaN	1.52658
#560	NaN	0.867374
#561	0.666143	NaN
#562	1.09005	NaN
#563	NaN	0.0317211
#564	NaN	0.177638
#565	0.102484	0.102484
#566	NaN	0.444095
#567	0.159295	NaN
#568	0.385662	NaN
#569	0.523398	NaN
#570	NaN	0.162835
#571	NaN	0.457973
#572	0.509403	NaN
#573	NaN	0.484468
#574	0.634422	NaN
#575	0.51071	NaN
#576	NaN	1.17856
#577	NaN	0.515724
#578	NaN	0.614901
#579	1.23712	NaN
#580	NaN	0.810957
#581	NaN	0.565212
#582	0.603692	NaN
#583	NaN	0.999214
#584	1.52821	NaN
#585	NaN	0.405931
#586	NaN	0.485333
#587	NaN	0.642769
#588	NaN	0.731665
#589	0.628614	0.628614
#590	1.09134	NaN
#591	0.874733	NaN
#592	NaN	0.161489
#593	NaN	0.444095
#594	0.610631	NaN
#595	0.504654	0.504654
#596	0.946624	NaN
#597	NaN	0.715487
#598	NaN	0.0499607
#599	NaN	0.0119666
#600	NaN	0.175301
#601	NaN	0.0287544
#602	NaN	0.317211
#603	0.305315	NaN
#604	0.666143	NaN
#605	NaN	0.118954
#606	0.333071	NaN
#607	0.512418	NaN
#608	NaN	0.717385
#609	NaN	0.475816
#610	NaN	0.304522
#611	0.259958	0.259958
#612	0.629135	NaN
#613	0.527363	NaN
#614	0.380653	NaN
#615	0.166536	NaN
#616	NaN	0.207044
#617	0.278569	NaN
#618	NaN	0.666143
#619	NaN	0.616799
#620	NaN	0.793027
#621	0.416339	NaN
#622	NaN	0.824748
#623	0.749411	NaN
#624	NaN	0.528996
#625	0.643172	NaN
#626	1.19906	NaN
#627	1.76052	NaN
#628	0.757574	NaN
#629	0.689934	NaN
#630	1.15698	1.15698
#631	0.38594	NaN
#632	0.529498	NaN
#633	1.29841	NaN
#634	0.915946	NaN
#635	NaN	0.426748
#636	0.703497	0.703497
#637	NaN	0.684269
#638	0.176732	NaN
#639	0.269292	NaN
#640	0.114852	0.114852
#641	NaN	0.416339
#642	NaN	0.222048
#643	NaN	0.245421
#644	NaN	0.856469
#645	NaN	0.856469
#646	NaN	0.599529
#647	0.133229	NaN
#648	NaN	0.431034
#649	0.210361	NaN
#650	0.254702	NaN
#651	NaN	1.15061
#652	NaN	0.777167
#653	NaN	0.95758
#654	0.520424	NaN
#655	NaN	0.371503
#656	0.70912	NaN
#657	NaN	0.805568
#658	0.88819	NaN
#659	0.603692	NaN
#660	0.999214	NaN
#661	1.67868	1.67868
#662	NaN	0.845489
#663	NaN	0.61555
#664	NaN	0.789855
#665	NaN	0.682591
#666	0.762453	0.762453
#667	NaN	0.895353
#668	0.509403	NaN
#669	NaN	0.12336
#670	NaN	0.222048
#671	NaN	0.161489
#672	0.444095	0.444095
#673	0.610631	NaN
#674	0.504654	NaN
#675	0.946624	NaN
#676	NaN	0.715487
#677	0.0416339	NaN
#678	NaN	0.222048
#679	NaN	0.222048
#680	NaN	0.242234
#681	NaN	0.242234
#682	0.195924	NaN
#683	0.222048	NaN
#684	0.0406185	NaN
#685	NaN	0.222048
#686	NaN	0.666143
#687	NaN	0.548588
#688	NaN	0.477402
#689	0.549276	NaN
#690	0.222048	NaN
#691	NaN	0.222048
#692	NaN	0.249804
#693	0.302792	NaN
#694	0.475816	NaN
#695	0.416339	NaN
#696	0.518111	NaN
#697	0.666143	NaN
#698	NaN	0.545026
#699	0.732757	NaN
#700	0.610631	NaN
#701	0.865986	NaN
#702	0.199843	NaN
#703	NaN	0.322978
#704	NaN	0.560962
#705	0.754962	NaN
#706	NaN	0.276206
#707	NaN	1.09005
#708	NaN	0.666143
#709	0.740159	0.740159
#710	0.55956	NaN
#711	0.399686	NaN
#712	0.208791	0.208791
#713	NaN	0.291438
#714	0.814175	NaN
#715	NaN	0.772726
#716	NaN	0.764831
#717	NaN	1.46551
#718	NaN	0.454669
#719	0.779875	NaN
#720	0.543163	NaN
#721	0.469716	NaN
#722	0.613274	NaN
#723	NaN	0.532914
#724	NaN	0.650407
#725	NaN	0.274294
#726	0.197376	NaN
#727	NaN	0.666143
#728	0.599529	NaN
#729	0.951633	NaN
#730	0.563659	NaN
#731	0.1859	0.1859
#732	0.103094	NaN
#733	0.355276	NaN
#734	NaN	0.413468
#735	NaN	1.02484
#736	NaN	0.9326
#737	0.472747	0.472747
#738	0.57098	NaN
#739	0.189325	NaN
#740	0.585398	NaN
#741	0.645326	NaN
#742	NaN	0.9326
#743	NaN	0.863519
#744	0.773585	NaN
#745	NaN	0.404054
#746	0.463921	0.463921
#747	1.21117	NaN
#748	0.832679	NaN
#749	NaN	0.364626
#750	0.516026	NaN
#751	NaN	0.4416
#752	0.68664	NaN
#753	0.656627	NaN
#754	0.891607	NaN
#755	NaN	0.0999214
#756	NaN	0.190327
#757	NaN	0.245421
#758	NaN	0.222048
#759	NaN	0.236373
#760	0.211216	0.211216
#761	0.444095	NaN
#762	NaN	0.148032
#763	NaN	0.333071
#764	0.416339	NaN
#765	0.799371	NaN
#766	NaN	0.119564
#767	0.0621733	NaN
#768	NaN	0.245421
#769	0.420722	NaN
#770	0.577324	NaN
#771	0.192441	NaN
#772	0.721655	NaN
#773	0.717385	NaN
#774	NaN	0.518111
#775	0.322978	NaN
#776	0.87111	NaN
#777	NaN	0.29037
#778	1.15061	NaN
#779	0.666143	NaN
#780	0.164576	NaN
#781	0.822882	NaN
#782	0.232141	NaN
#783	1.02142	NaN
#784	NaN	0.666143
#785	NaN	1.04085
#786	NaN	0.603692
#787	NaN	0.826017
#788	0.427337	NaN
#789	0.597821	NaN
#790	0.863519	NaN
#791	NaN	0.746887
#792	0.624509	0.624509
#793	0.696422	NaN
#794	NaN	0.80209
#795	0.801839	NaN
#796	NaN	1.17856
#797	0.933973	0.933973
#798	NaN	0.0774585
#799	NaN	0.370079
#800	NaN	0.202739
#801	0.385662	NaN
#802	0.471851	NaN
#803	NaN	0.461176
#804	0.493994	NaN
#805	NaN	0.488912
#806	0.44746	NaN
#807	NaN	0.0740159
#808	NaN	0.333071
#809	0.761306	NaN
#810	NaN	0.260665
#811	0.333071	NaN
#812	0.523398	NaN
#813	NaN	0.444095
#814	0.344557	NaN
#815	0.749411	NaN
#816	0.612851	NaN
#817	NaN	1.09438
#818	0.513882	NaN
#819	NaN	0.810957
#820	0.666143	NaN
#821	0.547717	NaN
#822	NaN	1.36401
#823	NaN	0.617696
#824	1.52658	NaN
#825	NaN	0.867374
#826	0.666143	NaN
#827	0.457973	NaN
#828	0.563659	NaN
#829	NaN	0.814175
#830	0.235109	NaN
#831	0.865986	NaN
#832	0.262951	NaN
#833	NaN	1.18425
#834	0.390498	NaN
#835	0.87111	NaN
#836	NaN	0.294342
#837	NaN	0.69945
#838	0.608217	NaN
#839	NaN	0.940437
#840	0.985891	NaN
#841	0.604176	NaN
#842	NaN	0.771323
#843	0.483491	NaN
#844	0.666143	NaN
#845	0.711562	NaN
#846	0.913567	NaN
#847	0.219067	NaN
#848	0.82106	NaN
#849	NaN	1.35608
#850	0.415444	NaN
#851	NaN	1.22711
#852	1.08557	NaN
#853	1.12677	NaN
#854	0.0979622	0.0979622
#855	0.602701	NaN
#856	0.395522	NaN
#857	NaN	0.69945
#858	0.4681	0.4681
#859	NaN	0.951633
#860	NaN	0.530195
#861	NaN	0.349845
#862	0.00145129	NaN
#863	NaN	0.00564528
#864	NaN	0.00283465
#865	0.00066681	0.00066681
#866	0.0152261	0.0152261
#867	NaN	0.666143
#868	0.203544	0.203544
#869	NaN	0.799371
#870	0.0974843	0.0974843
#871	0.470218	NaN
#872	0.461176	NaN
#873	0.555119	NaN
#874	0.555119	NaN
#875	0.139808	NaN
#876	NaN	0.707777
#877	1.09824	NaN
#878	NaN	0.696888
#879	NaN	0.0317211
#880	NaN	0.177638
#881	0.102484	NaN
#882	NaN	0.444095
#883	NaN	0.416339
#884	0.179346	NaN
#885	0.560962	NaN
#886	NaN	0.0459409
#887	NaN	0.171294
#888	0.666143	NaN
#889	0.666143	NaN
#890	NaN	0.632836
#891	0.10518	NaN
#892	0.0790339	NaN
#893	NaN	0.777167
#894	NaN	0.431034
#895	0.481103	NaN
#896	0.865986	NaN
#897	1.8081	NaN
#898	NaN	0.874313
#899	0.333071	NaN
#900	0.876504	NaN
#901	1.11024	NaN
#902	1.50992	NaN
#903	NaN	0.685176
#904	0.78726	NaN
#905	NaN	1.33229
#906	1.72413	NaN
#907	0.464055	NaN
#908	0.333071	NaN
#909	NaN	0.249804
#910	0.307451	NaN
#911	0.141303	NaN
#912	0.592127	NaN
#913	0.355276	NaN
#914	0.260665	NaN
#915	0.749411	NaN
#916	NaN	0.293103
#917	NaN	0.138256
#918	0.732757	NaN
#919	NaN	0.548588
#920	0.592127	NaN
#921	0.323555	NaN
#922	NaN	0.799371
#923	0.438679	NaN
#924	0.565212	NaN
#925	0.548588	NaN
#926	NaN	0.839919
#927	NaN	0.40491
#928	NaN	1.2931
#929	0.584906	NaN
#930	1.59874	NaN
#931	NaN	0.987729
#932	0.666143	NaN
#933	NaN	0.283111
#934	NaN	0.909854
#935	NaN	0.388044
#936	1.09543	NaN
#937	0.745028	NaN
#938	0.547031	0.547031
#939	NaN	0.483594
#940	0.0317211	0.0317211
#941	NaN	0.177638
#942	0.102484	NaN
#943	NaN	0.444095
#944	0.484468	NaN
#945	0.161489	NaN
#946	NaN	0.666143
#947	NaN	0.193396
#948	NaN	0.333071
#949	NaN	0.376516
#950	1.2847	NaN
#951	NaN	0.826017
#952	0.749411	NaN
#953	NaN	0.242234
#954	0.475816	NaN
#955	NaN	0.348932
#956	NaN	0.31859
#957	NaN	1.08248
#958	0.97701	NaN
#959	0.580189	NaN
#960	NaN	1.18089
#961	NaN	0.991091
#962	NaN	0.237908
#963	0.555119	NaN
#964	0.286812	0.286812
#965	0.666143	NaN
#966	0.666143	NaN
#967	0.78726	NaN
#968	0.418718	NaN
#969	NaN	0.808888
#970	0.530447	NaN
#971	0.12336	NaN
#972	NaN	0.0740159
#973	0.333071	NaN
#974	0.761306	NaN
#975	NaN	0.260665
#976	0.333071	NaN
#977	0.523398	NaN
#978	NaN	0.444095
#979	0.344557	NaN
#980	0.749411	NaN
#981	0.612851	NaN
#982	NaN	1.09438
#983	0.513882	NaN
#984	NaN	0.810957
#985	NaN	0.688348
#986	0.666143	NaN
#987	0.547717	NaN
#988	NaN	0.519591
#989	NaN	0.761306
#990	NaN	1.36401
#991	NaN	0.617696
#992	1.52658	NaN
#993	NaN	1.27827
#994	NaN	0.867374
#995	0.666143	NaN
#996	0.380653	NaN
#997	NaN	1.07608
#998	0.210361	NaN
#999	0.358692	NaN
#1000	0.420722	NaN
#1001	0.548588	NaN
#1002	0.548588	NaN
#1003	0.116575	NaN
#1004	0.819868	NaN
#1005	NaN	0.707777
#1006	NaN	0.251654
#1007	NaN	1.06583
#1008	0.362034	NaN
#1009	0.256941	NaN
#1010	NaN	0.551947
#1011	0.752097	NaN
#1012	NaN	0.666143
#1013	0.651003	NaN
#1014	0.680946	NaN
#1015	0.680946	NaN
#1016	NaN	0.620981
#1017	NaN	0.728987
#1018	0.967493	NaN
#1019	0.856469	NaN
#1020	NaN	0.816968
#1021	0.416339	NaN
#1022	NaN	0.639848
#1023	0.49799	0.49799
#1024	0.501135	0.501135
#1025	NaN	0.737198
#1026	0.638387	NaN
#1027	0.563194	0.563194
#1028	NaN	0.613186
#1029	NaN	0.222048
#1030	NaN	0.302792
#1031	NaN	0.799371
#1032	0.808888	NaN
#1033	NaN	0.697864
#1034	0.645957	NaN
#1035	0.617401	NaN
#1036	NaN	0.584782
#1037	NaN	0.190327
#1038	NaN	0.249804
#1039	0.532914	NaN
#1040	0.555119	NaN
#1041	NaN	0.832679
#1042	NaN	0.370079
#1043	0.222048	NaN
#1044	NaN	0.363351
#1045	NaN	0.235109
#1046	NaN	0.363351
#1047	NaN	0.274294
#1048	0.179346	NaN
#1049	0.777167	NaN
#1050	0.355276	NaN
#1051	NaN	0.484468
#1052	NaN	1.19906
#1053	0.856469	NaN
#1054	NaN	0.499607
#1055	NaN	0.214117
#1056	NaN	0.350602
#1057	0.814175	NaN
#1058	0.666143	NaN
#1059	0.666143	NaN
#1060	NaN	0.962206
#1061	NaN	1.23712
#1062	0.444095	NaN
#1063	NaN	0.587773
#1064	0.390498	NaN
#1065	1.13244	NaN
#1066	0.843781	NaN
#1067	NaN	0.88819
#1068	1.27173	NaN
#1069	NaN	0.451258
#1070	NaN	1.33229
#1071	1.22126	NaN
#1072	0.851183	NaN
#1073	0.275645	NaN
#1074	0.555119	NaN
#1075	1.11024	NaN
#1076	NaN	0.504654
#1077	1.15465	NaN
#1078	0.824748	NaN
#1079	0.620202	NaN
#1080	NaN	0.897845
#1081	NaN	0.845489
#1082	0.838847	NaN
#1083	NaN	0.986878
#1084	NaN	0.918818
#1085	NaN	0.596753
#1086	NaN	0.819868
#1087	0.906694	NaN
#1088	NaN	1.51396
#1089	0.867535	NaN
#1090	NaN	0.917797
#1091	1.49882	NaN
#1092	0.875129	NaN
#1093	1.16981	1.16981
#1094	1.03187	NaN
#1095	NaN	1.06131
#1096	NaN	1.46854
#1097	NaN	1.58015
#1098	1.14052	NaN
#1099	NaN	0.104493
#1100	0.856469	NaN
#1101	0.377481	NaN
#1102	NaN	0.52832
#1103	0.490842	NaN
#1104	0.624509	NaN
#1105	0.975759	NaN
#1106	NaN	0.320162
#1107	NaN	0.291438
#1108	NaN	0.256209
#1109	NaN	0.962206
#1110	1.4063	NaN
#1111	1.99843	NaN
#1112	NaN	0.242234
#1113	0.475816	NaN
#1114	0.348932	NaN
#1115	NaN	0.31859
#1116	NaN	1.08248
#1117	0.97701	NaN
#1118	NaN	0.37849
#1119	0.580189	NaN
#1120	NaN	1.18089
#1121	NaN	0.991091
#1122	NaN	0.688724
#1123	NaN	0.626958
#1124	0.0999214	NaN
#1125	0.190327	NaN
#1126	0.245421	NaN
#1127	NaN	0.222048
#1128	NaN	0.236373
#1129	0.211216	NaN
#1130	NaN	0.423909
#1131	NaN	1.4063
#1132	NaN	1.8081
#1133	0.973593	NaN
#1134	0.532914	NaN
#1135	NaN	0.826936
#1136	0.547717	NaN
#1137	NaN	0.249804
#1138	0.28549	NaN
#1139	0.142745	NaN
#1140	0.88819	NaN
#1141	NaN	0.128931
#1142	NaN	0.592127
#1143	0.322327	NaN
#1144	0.951633	NaN
#1145	NaN	0.293103
#1146	0.767074	NaN
#1147	1.26884	NaN
#1148	0.482379	0.482379
#1149	NaN	0.555119
#1150	0.749411	NaN
#1151	NaN	0.24672
#1152	0.183189	NaN
#1153	NaN	1.44331
#1154	NaN	0.106912
#1155	0.188531	NaN
#1156	NaN	0.0698751
#1157	NaN	0.539259
#1158	NaN	0.783697
#1159	0.423909	NaN
#1160	NaN	1.03622
#1161	0.623166	NaN
#1162	NaN	0.758025
#1163	0.984733	NaN
#1164	NaN	0.23315
#1165	0.250699	NaN
#1166	0.417751	NaN
#1167	0.302088	NaN
#1168	NaN	0.215054
#1169	0.64002	NaN
#1170	NaN	0.936201
#1171	1.00931	NaN
#1172	1.21117	NaN
#1173	0.222048	NaN
#1174	0.0783697	NaN
#1175	NaN	0.499607
#1176	NaN	0.370079
#1177	1.55433	NaN
#1178	NaN	0.518111
#1179	NaN	0.423909
#1180	0.231702	NaN
#1181	0.230588	NaN
#1182	0.428235	NaN
#1183	NaN	0.181675
#1184	NaN	0.319749
#1185	NaN	0.360827
#1186	0.298616	NaN
#1187	NaN	0.577324
#1188	0.618561	NaN
#1189	0.509403	NaN
#1190	NaN	1.03622
#1191	NaN	0.344557
#1192	0.999214	NaN
#1193	NaN	0.256209
#1194	1.06583	NaN
#1195	0.819868	NaN
#1196	2.26489	NaN
#1197	NaN	0.87111
#1198	NaN	0.298011
#1199	0.632836	NaN
#1200	0.383537	NaN
#1201	NaN	0.436438
#1202	0.612851	0.612851
#1203	NaN	0.58928
#1204	0.370079	NaN
#1205	0.666143	NaN
#1206	0.911564	NaN
#1207	NaN	0.545026
#1208	0.490842	NaN
#1209	0.621733	NaN
#1210	0.919912	NaN
#1211	0.764831	NaN
#1212	NaN	0.647639
#1213	1.05977	NaN
#1214	0.72492	NaN
#1215	0.666143	NaN
#1216	NaN	1.36735
#1217	0.859539	NaN
#1218	1.83189	NaN
#1219	NaN	0.856469
#1220	0.761306	NaN
#1221	0.898518	NaN
#1222	NaN	0.633382
#1223	1.66536	NaN
#1224	NaN	0.793027
#1225	NaN	0.249804
#1226	0.28549	NaN
#1227	0.142745	NaN
#1228	0.88819	NaN
#1229	0.128931	0.128931
#1230	NaN	0.592127
#1231	0.322327	NaN
#1232	0.0999214	NaN
#1233	0.190327	NaN
#1234	0.245421	NaN
#1235	NaN	0.222048
#1236	NaN	0.236373
#1237	0.211216	NaN
#1238	0.666143	NaN
#1239	0.0488505	NaN
#1240	0.088085	NaN
#1241	0.592127	NaN
#1242	0.523398	NaN
#1243	0.489411	NaN
#1244	0.59073	NaN
#1245	0.738813	NaN
#1246	0.643938	NaN
#1247	0.692012	NaN
#1248	1.09072	1.09072
#1249	0.813492	NaN
#1250	NaN	0.399686
#1251	0.532914	NaN
#1252	0.370079	NaN
#1253	NaN	0.499607
#1254	0.333071	NaN
#1255	NaN	0.484468
#1256	0.088284	NaN
#1257	NaN	0.470218
#1258	NaN	0.270621
#1259	NaN	0.587773
#1260	NaN	0.666143
#1261	0.575305	NaN
#1262	0.579255	NaN
#1263	NaN	1.27173
#1264	NaN	0.697864
#1265	NaN	1.27677
#1266	1.02142	NaN
#1267	1.01674	NaN
#1268	NaN	0.712084
#1269	0.968935	NaN
#1270	NaN	0.612131
#1271	0.9326	NaN
#1272	1.29528	NaN
#1273	NaN	0.481673
#1274	1.2336	NaN
#1275	0.666143	NaN
#1276	0.973593	NaN
#1277	1.28931	NaN
#1278	NaN	0.876504
#1279	NaN	0.194292
#1280	0.162035	NaN
#1281	NaN	0.391849
#1282	0.555119	NaN
#1283	0.457973	NaN
#1284	NaN	0.470218
#1285	0.432993	NaN
#1286	0.346394	NaN
#1287	0.865986	NaN
#1288	0.434441	NaN
#1289	2.13166	NaN
#1290	NaN	1.19906
#1291	0.357743	NaN
#1292	0.794247	NaN
#1293	NaN	0.389631
#1294	0.761306	NaN
#1295	0.879309	NaN
#1296	0.614901	NaN
#1297	0.555119	NaN
#1298	0.635864	NaN
#1299	0.472497	0.472497
#1300	1.0494	NaN
#1301	NaN	1.06118
#1302	NaN	0.222048
#1303	0.177638	NaN
#1304	0.296063	NaN
#1305	NaN	0.555119
#1306	0.499607	NaN
#1307	0.666143	NaN
#1308	0.407087	NaN
#1309	0.732757	NaN
#1310	NaN	0.666143
#1311	1.23712	NaN
#1312	0.370079	NaN
#1313	NaN	0.492366
#1314	0.88819	NaN
#1315	NaN	1.44984
#1316	1.70699	NaN
#1317	0.751546	NaN
#1318	1.76332	NaN
#1319	NaN	1.00996
#1320	0.882189	NaN
#1321	0.704574	NaN
#1322	NaN	0.524032
#1323	0.619883	NaN
#1324	1.62617	NaN
#1325	NaN	0.529346
#1326	0.761306	0.761306
#1327	0.832679	NaN
#1328	0.0999214	NaN
#1329	0.190327	NaN
#1330	0.245421	NaN
#1331	0.222048	NaN
#1332	NaN	0.236373
#1333	0.211216	NaN
#1334	0.222048	NaN
#1335	NaN	0.0555119
#1336	NaN	0.140241
#1337	0.107442	NaN
#1338	NaN	0.199843
#1339	0.836949	NaN
#1340	0.666143	NaN
#1341	0.749411	NaN
#1342	0.740159	NaN
#1343	NaN	0.358692
#1344	0.390498	NaN
#1345	0.943702	NaN
#1346	0.766064	NaN
#1347	0.740159	NaN
#1348	0.548588	NaN
#1349	0.697864	NaN
#1350	NaN	0.984733
#1351	NaN	0.896731
#1352	1.2336	NaN
#1353	0.943702	0.943702
#1354	0.0459409	0.0459409
#1355	NaN	0.171294
#1356	NaN	0.749411
#1357	0.879309	NaN
#1358	NaN	1.4063
#1359	0.222048	NaN
#1360	0.370079	NaN
#1361	NaN	0.666143
#1362	NaN	1.11024
#1363	NaN	0.999214
#1364	0.814175	NaN
#1365	0.507537	NaN
#1366	0.560962	NaN
#1367	NaN	0.465584
#1368	0.0799371	NaN
#1369	0.181675	NaN
#1370	0.0951633	NaN
#1371	0.242234	NaN
#1372	NaN	0.302792
#1373	NaN	0.222048
#1374	0.302792	NaN
#1375	NaN	0.499607
#1376	0.142745	NaN
#1377	0.266457	NaN
#1378	0.666143	NaN
#1379	0.555119	NaN
#1380	1.23712	NaN
#1381	0.26242	NaN
#1382	0.216884	0.216884
#1383	0.582875	NaN
#1384	0.768626	NaN
#1385	0.322978	NaN
#1386	0.492366	NaN
#1387	0.566221	NaN
#1388	0.419423	NaN
#1389	0.545026	NaN
#1390	NaN	1.4063
#1391	1.4063	NaN
#1392	NaN	1.21117
#1393	0.69945	NaN
#1394	NaN	0.777167
#1395	NaN	1.27173
#1396	0.4663	NaN
#1397	1.09438	NaN
#1398	1.91516	NaN
#1399	0.515724	NaN
#1400	0.438252	NaN
#1401	0.911564	NaN
#1402	1.46551	NaN
#1403	0.95577	NaN
#1404	0.803966	NaN
#1405	NaN	1.33229
#1406	0.910395	NaN
#1407	1.03145	NaN
#1408	1.09591	NaN
#1409	NaN	0.705328
#1410	NaN	0.65605
#1411	NaN	0.920488
#1412	0.691045	NaN
#1413	1.05528	NaN
#1414	0.0740159	0.0740159
#1415	0.333071	NaN
#1416	0.761306	NaN
#1417	NaN	0.260665
#1418	0.333071	NaN
#1419	0.523398	NaN
#1420	NaN	0.444095
#1421	0.749411	NaN
#1422	NaN	0.482379
#1423	1.09438	NaN
#1424	NaN	0.810957
#1425	NaN	0.688348
#1426	NaN	0.519591
#1427	NaN	0.761306
#1428	1.36401	NaN
#1429	0.617696	NaN
#1430	1.52658	NaN
#1431	NaN	1.27827
#1432	0.867374	NaN
#1433	NaN	0.249804
#1434	0.28549	NaN
#1435	0.88819	NaN
#1436	0.128931	NaN
#1437	NaN	0.592127
#1438	0.499607	NaN
#1439	NaN	0.768626
#1440	2.66457	NaN
#1441	NaN	0.484468
#1442	NaN	0.706515
#1443	1.06089	NaN
#1444	NaN	0.491417
#1445	1.18187	NaN
#1446	NaN	0.222048
#1447	0.177638	NaN
#1448	0.296063	NaN
#1449	NaN	0.555119
#1450	0.499607	NaN
#1451	0.666143	NaN
#1452	0.407087	NaN
#1453	0.732757	NaN
#1454	NaN	0.666143
#1455	1.23712	NaN
#1456	0.370079	NaN
#1457	NaN	0.492366
#1458	0.88819	NaN
#1459	NaN	1.44984
#1460	1.70699	NaN
#1461	1.76332	NaN
#1462	NaN	1.00996
#1463	0.704574	NaN
#1464	NaN	0.524032
#1465	0.619883	NaN
#1466	1.62617	NaN
#1467	NaN	0.529346
#1468	0.761306	NaN
#1469	0.832679	NaN
#1470	0.310867	NaN
#1471	0.272513	NaN
#1472	0.405478	NaN
#1473	0.717385	NaN
#1474	0.207244	NaN
#1475	0.666143	NaN
#1476	0.311812	0.311812
#1477	0.434441	NaN
#1478	0.338532	0.338532
#1479	0.703151	NaN
#1480	0.38594	NaN
#1481	0.624938	NaN
#1482	0.756467	NaN
#1483	0.644654	NaN
#1484	NaN	0.31859
#1485	NaN	1.02949
#1486	0.0999214	NaN
#1487	0.190327	NaN
#1488	0.245421	NaN
#1489	0.222048	NaN
#1490	0.236373	NaN
#1491	0.211216	NaN
#1492	0.12336	NaN
#1493	0.666143	NaN
#1494	NaN	0.726701
#1495	0.908377	NaN
#1496	NaN	0.701203
#1497	0.417582	0.417582
#1498	1.06583	NaN
#1499	1.27519	NaN
#1500	0.170079	NaN
#1501	0.973593	NaN
#1502	0.744513	NaN
#1503	0.822882	NaN
#1504	0.272513	NaN
#1505	NaN	0.444095
#1506	NaN	0.230588
#1507	NaN	0.352664
#1508	NaN	0.814175
#1509	0.298011	NaN
#1510	NaN	0.635864
#1511	0.303855	NaN
#1512	0.48328	NaN
#1513	0.666143	NaN
#1514	0.847818	NaN
#1515	NaN	1.0726
#1516	0.666143	NaN
#1517	NaN	0.726701
#1518	0.908377	NaN
#1519	0.701203	0.701203
#1520	0.417582	NaN
#1521	1.06583	NaN
#1522	1.27519	NaN
#1523	0.0555119	NaN
#1524	NaN	0.140241
#1525	0.199843	NaN
#1526	0.836949	NaN
#1527	0.239811	NaN
#1528	0.28549	NaN
#1529	0.634422	NaN
#1530	0.383032	0.383032
#1531	0.340158	NaN
#1532	0.178078	NaN
#1533	0.731451	NaN
#1534	1.10439	NaN
#1535	NaN	0.348932
#1536	0.69945	NaN
#1537	0.951633	NaN
#1538	0.530195	NaN
#1539	0.349845	NaN
#1540	0.293103	NaN
#1541	NaN	0.492366
#1542	0.482379	NaN
#1543	0.178078	NaN
#1544	0.731451	NaN
#1545	1.10439	NaN
#1546	NaN	0.348932
#1547	0.69945	NaN
#1548	0.951633	NaN
#1549	0.530195	NaN
#1550	0.349845	NaN
#1551	0.102484	NaN
#1552	0.749411	NaN
#1553	0.879309	NaN
#1554	1.4063	NaN
#1555	0.0614901	NaN
#1556	0.178078	NaN
#1557	0.731451	NaN
#1558	1.10439	NaN
#1559	0.749411	NaN
#1560	0.879309	NaN
#1561	1.4063	NaN
#1562	0.399686	NaN
#1563	0.499607	NaN
#1564	0.545026	NaN
#1565	0.915946	NaN
#1566	0.176732	0.176732
#1567	0.624509	NaN
#1568	0.507537	NaN
#1569	0.539259	NaN
#1570	0.263682	NaN
#1571	0.472747	NaN
#1572	0.721655	NaN
#1573	0.513882	NaN
#1574	0.88819	NaN
#1575	0.368338	NaN
#1576	1.77638	NaN
#1577	0.666143	NaN
#1578	0.575818	NaN
#1579	0.170079	NaN
#1580	0.744513	NaN
#1581	0.272513	NaN
#1582	0.444095	0.444095
#1583	0.423909	NaN
#1584	1.4063	NaN
#1585	1.8081	NaN
#1586	0.826936	NaN
#1587	0.166536	NaN
#1588	0.480103	0.480103
#1589	0.27756	NaN
#1590	0.210361	0.210361
#1591	0.88819	NaN
#1592	0.945493	NaN
