# Supplementary material for: Activity-dependent regulation of mitochondrial motility in developing cortical dendrites
Source: eLife. 2021 Sep 7;10:e62091. doi: 10.7554/eLife.62091 (PMC8423438; doi:10.7554/eLife.62091)
Supplement: Figure 3—figure supplement 1—source data 5. [file elife-62091-fig3-figsupp1-data5.xlsx]

## Sheet: Sheet1
Mitochondrion #	Mito_speed 2 min before	Mito_speed 2 min after
#1	NaN	0.142745
#2	0.370079	0.370079
#3	NaN	0.128931
#4	NaN	0.310867
#5	NaN	0.352664
#6	NaN	0.057098
#7	NaN	0.216046
#8	NaN	0.0799371
#9	NaN	0.416339
#10	NaN	0.761306
#11	0.499607	0.499607
#12	NaN	1.77638
#13	1.33229	NaN
#14	NaN	1.70237
#15	NaN	0.106583
#16	NaN	0.423909
#17	0.118187	0.118187
#18	NaN	0.514747
#19	NaN	0.0525902
#20	NaN	0.088819
#21	NaN	0.151396
#22	NaN	0.175301
#23	0.122711	0.122711
#24	NaN	0.599529
#25	NaN	0.0493439
#26	NaN	0.0555119
#27	NaN	0.28549
#28	0.261699	NaN
#29	NaN	0.420722
#30	0.455782	NaN
#31	NaN	0.567455
#32	NaN	0.719434
#33	NaN	0.620202
#34	NaN	1.59874
#35	NaN	0.801839
#36	NaN	0.249804
#37	NaN	0.151396
#38	0.666143	NaN
#39	0.222048	0.222048
#40	NaN	0.940437
#41	NaN	0.946624
#42	NaN	0.18652
#43	0.324531	NaN
#44	NaN	0.314904
#45	NaN	0.803966
#46	NaN	0.852043
#47	0.187886	NaN
#48	NaN	0.0605584
#49	NaN	0.666143
#50	NaN	0.157771
#51	NaN	0.666143
#52	NaN	0.10518
#53	0.24672	NaN
#54	NaN	0.380653
#55	0.247424	NaN
#56	NaN	0.624509
#57	0.416339	NaN
#58	NaN	0.312254
#59	NaN	0.298011
#60	NaN	0.36162
#61	NaN	1.27677
#62	NaN	0.525902
#63	NaN	0.768626
#64	0.99293	0.99293
#65	1.77638	NaN
#66	1.33229	NaN
#67	NaN	1.70237
#68	NaN	0.142745
#69	0.370079	NaN
#70	NaN	0.153725
#71	NaN	0.128931
#72	NaN	0.310867
#73	NaN	0.761306
#74	0.352664	NaN
#75	NaN	0.057098
#76	NaN	0.216046
#77	0.0799371	0.0799371
#78	NaN	0.416339
#79	0.761306	NaN
#80	NaN	0.560962
#81	0.108023	NaN
#82	0.126884	NaN
#83	NaN	0.20817
#84	NaN	0.666143
#85	0.999214	NaN
#86	0.499607	NaN
#87	0.0918818	NaN
#88	NaN	0.307451
#89	0.133229	NaN
#90	NaN	1.08248
#91	NaN	0.777167
#92	NaN	0.0493439
#93	NaN	0.0555119
#94	NaN	0.28549
#95	0.261699	NaN
#96	NaN	0.420722
#97	0.455782	NaN
#98	NaN	0.862067
#99	NaN	0.567455
#100	NaN	0.719434
#101	NaN	0.620202
#102	NaN	0.620202
#103	NaN	1.59874
#104	0.801839	NaN
#105	NaN	0.088819
#106	0.151396	NaN
#107	0.175301	0.175301
#108	0.122711	NaN
#109	NaN	0.599529
#110	NaN	0.0799371
#111	NaN	0.18504
#112	NaN	0.0487422
#113	0.222048	NaN
#114	0.940437	NaN
#115	0.946624	NaN
#116	NaN	0.142745
#117	0.370079	NaN
#118	NaN	0.153725
#119	0.128931	0.128931
#120	NaN	0.310867
#121	NaN	0.761306
#122	0.352664	NaN
#123	NaN	0.057098
#124	NaN	0.216046
#125	0.0799371	0.0799371
#126	NaN	0.416339
#127	0.761306	NaN
#128	NaN	0.560962
#129	NaN	0.307451
#130	0.133229	NaN
#131	NaN	1.08248
#132	NaN	0.777167
#133	NaN	0.548588
#134	NaN	0.18652
#135	0.324531	NaN
#136	NaN	0.370079
#137	NaN	0.314904
#138	NaN	0.803966
#139	NaN	0.852043
#140	NaN	1.06933
#141	0.126884	NaN
#142	0.20817	NaN
#143	NaN	0.666143
#144	0.999214	NaN
#145	0.108023	NaN
#146	NaN	0.502749
#147	NaN	0.249804
#148	NaN	0.0768626
#149	NaN	0.151396
#150	NaN	0.100931
#151	0.666143	NaN
#152	NaN	0.0605584
#153	NaN	0.666143
#154	NaN	0.0951633
#155	NaN	0.157771
#156	NaN	0.666143
#157	NaN	0.10518
#158	0.24672	NaN
#159	NaN	0.614901
#160	NaN	0.380653
#161	0.247424	NaN
#162	NaN	0.624509
#163	0.416339	NaN
#164	NaN	0.312254
#165	NaN	0.298011
#166	NaN	0.36162
#167	NaN	1.27677
#168	NaN	0.525902
#169	NaN	0.768626
#170	0.99293	NaN
#171	NaN	0.18652
#172	0.324531	NaN
#173	NaN	0.370079
#174	NaN	0.314904
#175	NaN	0.803966
#176	NaN	0.852043
#177	NaN	1.06933
#178	NaN	0.166536
#179	0.577324	NaN
#180	0.211216	0.211216
#181	0.666143	NaN
#182	0.0855596	NaN
#183	NaN	0.57098
#184	NaN	1.02697
#185	0.87111	NaN
#186	1.39675	NaN
#187	0.499607	NaN
#188	NaN	0.133229
#189	NaN	0.199843
#190	0.23315	NaN
#191	0.0918818	NaN
#192	0.166536	0.166536
#193	0.577324	NaN
#194	0.211216	NaN
#195	0.666143	NaN
#196	0.0855596	NaN
#197	0.57098	0.57098
#198	NaN	1.02697
#199	0.87111	NaN
#200	1.39675	NaN
#201	0.499607	NaN
#202	NaN	0.0605584
#203	NaN	0.666143
#204	NaN	0.0951633
#205	NaN	0.157771
#206	NaN	0.666143
#207	NaN	0.10518
#208	0.24672	NaN
#209	NaN	0.124196
#210	NaN	0.614901
#211	NaN	0.380653
#212	0.247424	NaN
#213	NaN	0.624509
#214	0.416339	NaN
#215	NaN	0.312254
#216	NaN	0.298011
#217	NaN	0.36162
#218	NaN	1.27677
#219	0.525902	0.525902
#220	NaN	0.768626
#221	0.99293	NaN
#222	0.187886	NaN
#223	0.166536	NaN
#224	0.577324	NaN
#225	0.211216	NaN
#226	0.666143	NaN
#227	0.0855596	NaN
#228	0.57098	0.57098
#229	NaN	1.02697
#230	0.87111	NaN
#231	1.39675	NaN
#232	NaN	0.0493439
#233	0.0555119	NaN
#234	NaN	0.28549
#235	0.261699	NaN
#236	NaN	0.420722
#237	0.455782	NaN
#238	NaN	0.509403
#239	NaN	0.862067
#240	NaN	0.567455
#241	0.719434	NaN
#242	0.620202	NaN
#243	NaN	0.620202
#244	1.59874	NaN
#245	NaN	0.493119
#246	0.801839	NaN
#247	NaN	1.15356
#248	NaN	0.0799371
#249	NaN	0.18504
#250	NaN	0.0487422
#251	0.222048	NaN
#252	0.940437	NaN
#253	0.946624	NaN
#254	NaN	0.142745
#255	0.370079	NaN
#256	NaN	0.370079
#257	NaN	0.153725
#258	0.128931	NaN
#259	NaN	0.310867
#260	NaN	0.761306
#261	0.352664	NaN
#262	0.057098	0.057098
#263	NaN	0.216046
#264	0.0799371	NaN
#265	NaN	0.416339
#266	0.761306	NaN
#267	NaN	0.560962
#268	NaN	0.0444095
#269	0.0951633	NaN
#270	0.239811	NaN
#271	0.444095	NaN
#272	NaN	0.432993
#273	0.768626	NaN
#274	NaN	0.736263
#275	0.429292	NaN
#276	NaN	0.836949
#277	NaN	0.0605584
#278	0.666143	NaN
#279	NaN	0.0951633
#280	NaN	0.157771
#281	NaN	0.666143
#282	NaN	0.10518
#283	0.24672	NaN
#284	NaN	0.124196
#285	NaN	0.333071
#286	NaN	0.614901
#287	NaN	0.380653
#288	0.247424	NaN
#289	NaN	0.624509
#290	0.416339	NaN
#291	NaN	0.312254
#292	NaN	0.298011
#293	NaN	0.36162
#294	NaN	1.27677
#295	0.525902	NaN
#296	NaN	0.768626
#297	0.99293	NaN
#298	NaN	0.0925198
#299	0.307451	NaN
#300	0.133229	NaN
#301	1.08248	NaN
#302	NaN	0.777167
#303	NaN	0.548588
#304	0.142745	0.142745
#305	0.370079	NaN
#306	NaN	0.370079
#307	NaN	0.153725
#308	0.128931	NaN
#309	0.310867	0.310867
#310	NaN	0.280481
#311	NaN	0.761306
#312	0.352664	NaN
#313	0.057098	0.057098
#314	NaN	0.216046
#315	0.0799371	NaN
#316	0.416339	NaN
#317	0.761306	NaN
#318	NaN	0.560962
#319	0.499607	NaN
#320	0.166536	NaN
#321	0.577324	NaN
#322	0.211216	NaN
#323	0.666143	NaN
#324	0.0855596	NaN
#325	0.57098	NaN
#326	NaN	1.02697
#327	0.87111	NaN
#328	1.39675	NaN
#329	0.142745	NaN
#330	0.370079	NaN
#331	NaN	0.370079
#332	NaN	0.153725
#333	0.128931	NaN
#334	0.310867	NaN
#335	NaN	0.280481
#336	NaN	0.761306
#337	0.352664	NaN
#338	0.057098	NaN
#339	NaN	0.216046
#340	0.0799371	NaN
#341	0.416339	NaN
#342	0.761306	NaN
#343	NaN	0.560962
#344	NaN	0.222048
#345	NaN	0.0925198
#346	0.307451	NaN
#347	0.133229	NaN
#348	1.08248	NaN
#349	0.777167	NaN
#350	NaN	0.548588
#351	0.142745	NaN
#352	NaN	0.124902
#353	NaN	0.0868882
#354	NaN	0.666143
#355	0.12336	NaN
#356	NaN	0.555119
#357	0.0693899	NaN
#358	NaN	0.20817
#359	0.20817	NaN
#360	0.121117	0.121117
#361	NaN	0.0971458
#362	0.532914	NaN
#363	0.475816	NaN
#364	1.0468	NaN
#365	NaN	0.610631
#366	0.296063	0.296063
#367	0.621733	NaN
#368	NaN	0.370079
#369	0.754962	NaN
#370	NaN	0.666143
#371	0.701203	NaN
#372	1.11024	NaN
#373	0.865986	NaN
#374	0.826017	NaN
#375	0.625771	NaN
#376	0.849906	NaN
#377	0.249804	NaN
#378	0.666143	NaN
#379	0.323555	NaN
#380	0.272513	NaN
#381	NaN	0.0923848
#382	0.4663	NaN
#383	0.297385	NaN
#384	0.52484	NaN
#385	0.488505	NaN
#386	NaN	0.859539
#387	0.587773	NaN
#388	0.088819	NaN
#389	0.151396	NaN
#390	0.175301	NaN
#391	0.122711	NaN
#392	0.599529	NaN
#393	NaN	1.0468
#394	0.249804	NaN
#395	0.0768626	0.0768626
#396	0.151396	NaN
#397	NaN	0.100931
#398	NaN	0.133229
#399	NaN	0.199843
#400	NaN	0.222048
#401	NaN	0.0925198
#402	0.307451	NaN
#403	1.08248	NaN
#404	0.777167	NaN
#405	NaN	0.548588
#406	0.142745	NaN
#407	NaN	0.124902
#408	NaN	0.0868882
#409	0.666143	NaN
#410	0.12336	NaN
#411	0.555119	NaN
#412	0.0693899	NaN
#413	NaN	0.20817
#414	0.20817	NaN
#415	0.121117	NaN
#416	NaN	0.0971458
#417	0.532914	NaN
#418	0.475816	NaN
#419	0.610631	0.610631
#420	0.296063	NaN
#421	0.621733	NaN
#422	NaN	0.370079
#423	0.754962	NaN
#424	NaN	0.666143
#425	0.701203	NaN
#426	1.11024	NaN
#427	0.865986	NaN
#428	0.826017	NaN
#429	0.625771	NaN
#430	0.849906	NaN
#431	NaN	0.0444095
#432	NaN	0.380653
#433	0.432993	0.432993
#434	0.768626	NaN
#435	NaN	0.736263
#436	0.429292	NaN
#437	NaN	0.836949
#438	0.142745	NaN
#439	NaN	0.124902
#440	NaN	0.0868882
#441	0.666143	NaN
#442	0.12336	NaN
#443	0.555119	NaN
#444	0.0693899	NaN
#445	NaN	0.20817
#446	0.20817	NaN
#447	0.121117	NaN
#448	NaN	0.0971458
#449	0.532914	NaN
#450	0.475816	NaN
#451	0.610631	NaN
#452	0.296063	NaN
#453	0.621733	NaN
#454	NaN	0.370079
#455	NaN	0.666143
#456	0.701203	NaN
#457	1.11024	NaN
#458	0.865986	NaN
#459	0.826017	NaN
#460	0.625771	NaN
#461	0.849906	NaN
#462	0.0605584	NaN
#463	0.666143	NaN
#464	NaN	0.0951633
#465	NaN	0.777167
#466	0.157771	NaN
#467	0.666143	NaN
#468	0.10518	NaN
#469	NaN	0.059477
#470	NaN	0.124196
#471	NaN	0.333071
#472	0.614901	NaN
#473	0.380653	NaN
#474	0.624509	NaN
#475	0.312254	NaN
#476	0.298011	NaN
#477	NaN	0.666143
#478	0.36162	NaN
#479	1.27677	NaN
#480	0.525902	NaN
#481	0.768626	NaN
#482	NaN	0.478256
#483	0.088819	NaN
#484	0.175301	NaN
#485	0.599529	NaN
#486	NaN	1.0468
#487	0.0391849	NaN
#488	NaN	0.10518
#489	0.0859539	NaN
#490	NaN	0.12336
#491	NaN	0.274294
#492	0.478256	0.478256
#493	0.106583	NaN
#494	0.0525902	NaN
#495	NaN	0.141733
#496	NaN	1.77638
#497	NaN	0.88819
#498	NaN	0.289627
#499	0.142745	NaN
#500	NaN	0.370079
#501	0.153725	NaN
#502	0.128931	NaN
#503	0.310867	NaN
#504	NaN	0.280481
#505	0.761306	NaN
#506	NaN	0.153725
#507	0.057098	NaN
#508	NaN	0.242234
#509	0.216046	NaN
#510	0.0799371	NaN
#511	0.416339	NaN
#512	0.560962	NaN
#513	0.0605584	NaN
#514	NaN	0.0416339
#515	0.666143	NaN
#516	0.0951633	0.0951633
#517	NaN	0.777167
#518	0.157771	NaN
#519	0.666143	NaN
#520	0.10518	NaN
#521	NaN	0.059477
#522	NaN	0.124196
#523	NaN	0.333071
#524	0.614901	NaN
#525	0.380653	NaN
#526	0.624509	NaN
#527	0.312254	NaN
#528	0.298011	NaN
#529	NaN	0.666143
#530	NaN	0.799371
#531	0.36162	NaN
#532	1.27677	NaN
#533	0.525902	NaN
#534	NaN	0.587773
#535	0.768626	NaN
#536	0.0799371	NaN
#537	0.18504	NaN
#538	0.0487422	NaN
#539	NaN	0.122353
#540	NaN	0.135948
#541	NaN	0.726701
#542	NaN	0.770636
#543	NaN	0.222048
#544	0.0925198	0.0925198
#545	0.307451	NaN
#546	NaN	0.229704
#547	1.08248	NaN
#548	0.777167	NaN
#549	NaN	0.732757
#550	0.548588	NaN
#551	0.0605584	NaN
#552	NaN	0.0416339
#553	0.666143	NaN
#554	0.0951633	NaN
#555	NaN	0.117555
#556	NaN	0.777167
#557	0.157771	NaN
#558	0.666143	NaN
#559	0.10518	NaN
#560	NaN	0.059477
#561	NaN	0.124196
#562	NaN	0.333071
#563	0.614901	NaN
#564	0.380653	NaN
#565	0.624509	NaN
#566	0.312254	NaN
#567	0.298011	NaN
#568	NaN	0.666143
#569	NaN	0.799371
#570	0.36162	NaN
#571	1.27677	NaN
#572	0.525902	NaN
#573	NaN	0.587773
#574	0.768626	NaN
#575	0.0444095	NaN
#576	NaN	0.380653
#577	NaN	0.333071
#578	0.432993	NaN
#579	NaN	0.736263
#580	0.836949	0.836949
#581	0.142745	NaN
#582	0.370079	NaN
#583	0.153725	NaN
#584	0.310867	NaN
#585	0.280481	0.280481
#586	0.761306	NaN
#587	NaN	0.153725
#588	0.057098	NaN
#589	NaN	0.242234
#590	0.216046	NaN
#591	0.416339	NaN
#592	0.560962	NaN
#593	0.10518	NaN
#594	NaN	0.222048
#595	0.0493439	NaN
#596	0.28549	NaN
#597	NaN	0.236373
#598	0.420722	NaN
#599	0.509403	NaN
#600	0.121117	0.121117
#601	NaN	0.555119
#602	0.862067	NaN
#603	0.567455	NaN
#604	0.620202	NaN
#605	NaN	0.52441
#606	0.493119	0.493119
#607	1.15356	NaN
#608	1.02697	NaN
#609	0.142745	NaN
#610	0.370079	NaN
#611	0.153725	NaN
#612	0.310867	NaN
#613	0.280481	NaN
#614	0.761306	NaN
#615	NaN	0.153725
#616	0.057098	NaN
#617	NaN	0.242234
#618	0.216046	NaN
#619	0.416339	NaN
#620	0.560962	NaN
#621	0.0605584	NaN
#622	NaN	0.0416339
#623	0.0951633	NaN
#624	NaN	0.475816
#625	NaN	0.117555
#626	NaN	0.777167
#627	0.157771	NaN
#628	0.666143	NaN
#629	0.10518	NaN
#630	0.059477	0.059477
#631	0.124196	NaN
#632	0.333071	NaN
#633	0.614901	NaN
#634	0.380653	NaN
#635	0.624509	NaN
#636	0.312254	NaN
#637	0.298011	NaN
#638	NaN	0.666143
#639	NaN	0.799371
#640	0.36162	NaN
#641	1.27677	NaN
#642	NaN	0.444095
#643	NaN	0.587773
#644	0.768626	NaN
#645	0.114196	0.114196
#646	0.18652	NaN
#647	0.370079	NaN
#648	0.314904	NaN
#649	0.803966	NaN
#650	NaN	0.808888
#651	1.06933	NaN
#652	0.0799371	NaN
#653	0.18504	NaN
#654	0.0487422	NaN
#655	NaN	0.122353
#656	NaN	0.135948
#657	NaN	0.726701
#658	0.770636	0.770636
#659	0.0605584	NaN
#660	0.333071	NaN
#661	NaN	0.249804
#662	NaN	0.793027
#663	0.502749	NaN
#664	1.02697	NaN
#665	0.370079	NaN
#666	0.153725	NaN
#667	0.280481	NaN
#668	0.761306	NaN
#669	NaN	0.153725
#670	NaN	0.242234
#671	0.216046	NaN
#672	0.560962	NaN
#673	NaN	1.0468
#674	0.0799371	NaN
#675	0.18504	NaN
#676	0.0487422	NaN
#677	NaN	0.122353
#678	NaN	0.135948
#679	0.726701	NaN
#680	0.770636	NaN
#681	NaN	0.0416339
#682	0.0951633	NaN
#683	NaN	0.475816
#684	NaN	0.117555
#685	NaN	0.777167
#686	0.059477	0.059477
#687	0.124196	NaN
#688	0.333071	NaN
#689	0.614901	NaN
#690	NaN	0.666143
#691	NaN	0.799371
#692	0.36162	NaN
#693	1.27677	NaN
#694	NaN	0.444095
#695	NaN	0.587773
#696	0.114196	NaN
#697	0.18652	NaN
#698	0.370079	NaN
#699	0.808888	NaN
#700	1.06933	NaN
#701	0.222048	NaN
#702	0.0925198	NaN
#703	NaN	0.229704
#704	NaN	0.732757
#705	0.548588	NaN
#706	0.124902	NaN
#707	0.0868882	NaN
#708	0.20817	NaN
#709	0.0971458	0.0971458
#710	0.610631	NaN
#711	0.370079	NaN
#712	0.666143	NaN
#713	NaN	0.534933
#714	0.0799371	NaN
#715	0.0487422	NaN
#716	NaN	0.122353
#717	NaN	0.135948
#718	0.726701	NaN
#719	0.770636	NaN
#720	0.100931	NaN
#721	0.370079	NaN
#722	0.280481	NaN
#723	NaN	0.153725
#724	0.242234	NaN
#725	1.0468	NaN
#726	1.0468	NaN
#727	0.0799371	NaN
#728	0.122353	0.122353
#729	0.135948	NaN
#730	0.726701	NaN
#731	0.770636	NaN
#732	NaN	0.215517
#733	0.114196	NaN
#734	0.808888	NaN
#735	0.122353	NaN
#736	0.135948	NaN
#737	0.726701	NaN
#738	0.770636	NaN
#739	0.0416339	NaN
#740	NaN	0.475816
#741	0.117555	NaN
#742	0.777167	NaN
#743	0.059477	NaN
#744	0.124196	NaN
#745	0.333071	NaN
#746	0.666143	NaN
#747	0.799371	NaN
#748	NaN	0.444095
#749	0.587773	NaN
#750	0.222048	NaN
#751	0.0925198	NaN
#752	0.229704	NaN
#753	0.732757	NaN
#754	0.122353	NaN
#755	0.135948	NaN
#756	0.726701	NaN
#757	0.770636	NaN
#758	0.222048	NaN
#759	0.280481	NaN
#760	0.153725	NaN
#761	0.242234	NaN
#762	0.222048	NaN
#763	0.229704	NaN
#764	0.732757	NaN
#765	0.236373	NaN
#766	0.121117	NaN
#767	0.555119	NaN
#768	0.52441	NaN
#769	0.493119	NaN
