# Supplementary material for: Activity-dependent regulation of mitochondrial motility in developing cortical dendrites
Source: eLife. 2021 Sep 7;10:e62091. doi: 10.7554/eLife.62091 (PMC8423438; doi:10.7554/eLife.62091)
Supplement: Figure 3—figure supplement 2—source data 2. [file elife-62091-fig3-figsupp2-data2.xlsx]

## Sheet: Sheet1
	40	60	80	90	100	120	Interval (s)
1	12	15	16	19	23	19
2	13	17	18	21	25	19
3	15	18	19	21	25	19
4	18	19	20	22	26	20
5	20	20	21	24	29	24
6	21	21	24	24	29	24
7	27	32	30	30	34	30
8	29	35	32	33	36	31
9	30	37	34	35	38	31
10	34	42	39	40	43	34
11	42	49	42	42	44	35
12	47	52	43	43	44	35
13	50	55	44	44	45	36
14	54	59	46	45	46	36
15	56	63	50	49	49	37
16	60	67	52	51	51	38
17	61	67	52	51	51	38
18	62	66	53	52	51	39
19	65	71	57	56	54	40
20	68	74	60	58	56	41
Distance (um)
