# Supplementary material for: Activity-dependent regulation of mitochondrial motility in developing cortical dendrites
Source: eLife. 2021 Sep 7;10:e62091. doi: 10.7554/eLife.62091 (PMC8423438; doi:10.7554/eLife.62091)
Supplement: Figure 3—source data 1. [file elife-62091-fig3-data1.xlsx]

## Sheet: Sheet1
Experiment	Age slices obtained	DIVs	Total age	Frq_global_ca_transients (#/min)	Mitos_moving %
71a	P5	6	11	0.111111	1.11872
73b	P5	5	10	0.22	1.9859
73c	P5	5	10	0.266667	6.35933
75b	P5	5	10	0.22	11.3021
82b	P5	4	9	0.06	2.63204
91a	P5	7	12	0.18	10.1571
94e	P5	5	10	0.16	6.55626
94f	P5	5	10	0.11	7.07307
96b	P5	5	10	0.5	1.01229
96f	P5	5	10	0.23	2.20593
115a	P5	4	9	0.1	2.3887
115b	P5	4	9	0	1.0659
118a	P5	6	11	0.27	3.89957
119b	P5	7	12	0.4	2.94051
120b	P5	6	11	0.38	2.5125
113a	P8	4	12	0.63	0.685139
113b	P8	4	12	1.23333	2.70322
114a	P8	3	11	0.35	1.17849
117a	P8	3	11	0	0.567248
122b	P8	3	11	0.02	3.33949
