# Supplementary material for: Activity-dependent regulation of mitochondrial motility in developing cortical dendrites
Source: eLife. 2021 Sep 7;10:e62091. doi: 10.7554/eLife.62091 (PMC8423438; doi:10.7554/eLife.62091)
Supplement: Figure 3—source data 2. [file elife-62091-fig3-data2.xlsx]

## Sheet: Sheet1
Transient #	Mitos_moving % 2 min before	Mitos_moving % 2 min after
#1	14.2857	5.30952
#2	3.33333	2.25
#3	25.1638	12.8004
#4	0	2.05556
#5	16.9597	14.3801
#6	0	0.75
#7	1.30719	3.41667
#8	2.77778	2.09259
#9	0	2.42014
#10	7.32601	7.80647
#11	12.3843	0.9375
#12	9.02149	10.791
#13	10.0271	9.92308
#14	1.33333	0.364583
#15	4.32432	2.55208
#16	8.12587	13.8204
#17	10.305	4.85161
#18	7.67974	5.73816
#19	2.39316	0.740741
#20	5.53286	1.41319
#21	0.952381	2.68651
#22	0.888889	2.80556
#23	4.81803	1.25
#24	0.833333	2.80556
#25	4.59653	2.14236
#26	0	0.555556
#27	5.0551	4.33712
#28	0	1.46916
#29	0	2.67039
#30	4.0928	2.57986
#31	0.289575	2.37302
#32	6.68627	2.28075
#33	3.88019	2.80208
#34	8.01346	17.0116
#35	2.04607	1.75
#36	9.56566	15.405
#37	0.783972	1.98512
#38	4.06504	2.01736
#39	4.69497	14.5784
#40	0	2.22222
#41	9.63803	15.5312
#42	0	0.916667
#43	0	1.78571
#44	4.0942	6.02816
#45	2.42362	2.27679
#46	0	0.277778
#47	0	3
#48	0	1.52778
#49	4.5864	0
#50	0.294985	0
#51	0	2.08333
#52	6.62185	5.28878
#53	4.47854	4.16667
#54	3.78472	0.740741
#55	0.5	1.57292
#56	2.84701	1.11111
#57	4.25487	4.46387
#58	5.09615	2.48737
#59	0.357143	0.535714
#60	4.47417	4.5589
#61	0.277778	0
#62	0.0833333	3.83333
#63	8.27638	11.7952
#64	0.739992	1.70698
#65	1.2963	7.4537
#66	10.2096	5.21133
#67	4.72222	0
#68	0.520833	3.56924
#69	3.13889	0
#70	8.33578	12.5691
#71	0.357143	0.535714
#72	1.31291	1.22665
#73	5.4697	3.42929
#74	11.0129	11.9469
#75	11.178	6.56141
#76	0.595238	2.85317
#77	12.5149	7.46326
#78	5.82799	4.4565
#79	5.68512	5.10965
#80	12.6098	2.75327
#81	1.72569	5.12401
#82	16.6035	16.6667
#83	13.4821	5.1088
#84	1.16667	2.75
#85	1.33333	0.227273
#86	0	3.98148
#87	0.625	0
#88	0	1.2963
#89	5.06597	1.38419
#90	7.4194	8.55817
#91	1.41667	2.5
#92	2.34477	1.58138
#93	0.98652	1.99275
#94	0.833333	2.65046
#95	0.625	0
#96	2.00794	0.595238
#97	0.535714	0
#98	5.86786	5.92446
#99	0.277778	0.509259
#100	15.9062	16.1122
#101	1.62847	3.30903
#102	15.6568	14.8625
#103	3.45849	7.12347
#104	0.555556	1.57407
#105	1.32966	1.7422
#106	0	2.46875
#107	2.08333	1.36508
#108	1.83333	1
#109	1.75	1.64352
#110	2.98611	2.53472
#111	11.2191	12.3559
#112	14.0298	13.377
#113	1.75	1.02969
#114	2.08333	1.44964
#115	5.52198	0
#116	11.8347	0.512821
#117	8.18881	9.05392
#118	8.45057	5.63651
#119	15.2872	11.0471
#120	2.79365	0.810015
#121	2.17262	3.00926
#122	2.72436	0.864625
#123	1.56448	2.16693
#124	1.94444	2.87582
#125	1.05655	2.04082
#126	3.91369	5.48942
#127	13.9541	8.54323
#128	4.79525	5.95172
#129	1.28704	0.925926
#130	1.73485	6.26136
#131	12.8834	13.2202
#132	9.24253	1.77818
#133	0.763889	0
#134	0	3.22061
#135	3.21032	0
#136	0.535714	0
#137	3.21429	2.29606
#138	3.24206	1.69492
#139	3.41231	4.56037
#140	2.98993	2.08059
#141	3.31019	1.8018
#142	0.952381	0
#143	2.41667	2.28571
#144	3.50694	0
#145	4.15873	1.47059
#146	3.64583	2.94118
#147	3.50694	0
#148	3.99206	1.6129
#149	0.462963	0
#150	2.48512	0
#151	1.47436	0
#152	3.50694	0
#153	2.48512	0
#154	11.9131	1.2987
#155	1.93254	6.12245
#156	1	0
#157	2.70299	7.69231
#158	3.04924	1.81818
