# Supplementary material for: Activity-dependent regulation of mitochondrial motility in developing cortical dendrites
Source: eLife. 2021 Sep 7;10:e62091. doi: 10.7554/eLife.62091 (PMC8423438; doi:10.7554/eLife.62091)
Supplement: Figure 3—source data 3. [file elife-62091-fig3-data3.xlsx]

## Sheet: Sheet1
Transient #	Mitos_moving % 2 min before	Mitos_moving % 2 min after
#1	0	2.46053
#2	0	1.21429
#3	8.33333	1.99786
#4	1.51515	3.41704
#5	4.3956	1.32143
#6	5.71429	2.88194
#7	11.6959	6.72903
#8	0	3.75439
#9	3.49462	0
#10	2.01613	0.46875
#11	1.7094	0.495127
#12	4.50432	3.38192
#13	4.25926	1.16453
#14	3.85204	2.5641
#15	0.0847458	5.1121
#16	1.12994	1.32846
#17	1.58192	4.54861
#18	1.5625	0.208333
#19	1.59314	0.448718
#20	0	0.178571
#21	3.80952	7.12936
#22	1.33333	4.54861
#23	0	4.2756
#24	0	0.486111		.
#25	0	4.81788
#26	3.46724	7.27642
#27	0	5.06298
#28	4.25101	2.80479
#29	2.37049	2.82051
#30	1.29315	5.2699
#31	2.91041	1.01852
#32	3.81321	7.65938
#33	1.02481	1.75
#34	1.68522	4.81156
#35	0.201106	4.8669
#36	2.24799	4.06156
#37	0.95809	1.79825
#38	4.4218	2.66772
#39	6.5828	3.4246
#40	2.06731	0.192308
#41	0	0.357143
#42	0.486111	0.486111
#43	0.495127	1.79825
#44	5.03713	2.37706
#45	1.86315	1.93457
#46	5.06358	2.19188
#47	6.54385	4.23509
#48	0	1.13095
#49	1.37286	0.192308
#50	0.520833	1.87847
#51	0.0595238	1.07143
#52	2.86172	4.74893
#53	0	1.97802
#54	5.07801	1.58911
#55	6.88426	5.53454
#56	2.82051	3.62485
#57	1.54776	1.53265
#58	7.12936	6.01069
#59	0.539216	1.55161
#60	5.18656	0.83153
#61	0.833333	0.705128
#62	3.04685	3.48214
#63	5.06298	0.392157
#64	4.93656	1.02994
#65	7.71147	5.11295
#66	3.49306	1.46825
#67	3.41575	3.02961
#68	1.69414	0.952381
#69	5.06298	0.392157
#70	4.56156	1.35873
#71	0	0.198939
#72	0.902778	0
#73	0	0.900901
#74	4.08425	2.59939
#75	0	0.686813
#76	0	0.505051
#77	4.57278	4.47504
#78	3.35714	0
#79	1.79825	0.983796
#80	2.23156	1.51128
#81	0	0.793651
#82	3.37912	3.45528
#83	0.595238	1.80832
#84	2.35302	1.75829
#85	0	1.38889
#86	0.192308	0
#87	0	1.19048
#88	0.192308	0
#89	3.34173	0.833333
#90	0	3.53846
#91	1.46825	0
#92	3.62485	0
#93	0	1.42857
#94	6.05699	2.90626
#95	1.44493	0
#96	3.62485	0
#97	0.705128	0
#98	0.871212	4.7619
#99	1.00634	0
#100	3.39881	0
#101	0.416667	0
