# Supplementary material for: Activity-dependent regulation of mitochondrial motility in developing cortical dendrites
Source: eLife. 2021 Sep 7;10:e62091. doi: 10.7554/eLife.62091 (PMC8423438; doi:10.7554/eLife.62091)
Supplement: Figure 3—source data 4. [file elife-62091-fig3-data4.xlsx]

## Sheet: Sheet1
Transient #	Arriving before	Passing before	Arriving after	Passing after		% stopping before	% stopping after
#1	0	1	0	0		20.3704	47.5
#2	1	1	0	0
#3	0	0	0	1
#4	0	0	1	1
#5	0	1	0	0
#6	1	2	1	0
#7	0	0	0	1
#8	0	3	0	1
#9	1	0	1	2
#10	0	1	2	2
#11	0	1	1	0
#12	0	2	0	3
#13	0	1	1	1
#14	0	1	1	1
#15	0	3	0	0
#16	0	3	0	0
#17	0	3	0	0
#18	2	3	0	0
#19	0	2	0	0
#20	1	2	0	1
#21	1	0	1	1
#22	0	2	0	0
#23	0	0	0	0
#24	1	0	0	1
#25	0	2	0	0
#26	0	0	0	0
#27	0	0	0	1
#28	0	0	0	1
#29	0	1	0	0
#30	0	0	0	0
#31	0	0	0	0
#32	0	2	0	1
#33	0	1	0	1
#34	0	0	2	0
#35	1	0	1	0
#36	0	0	0	0
#37	0	1	0	0
#38	1	0	1	0
#39	1	0	1	0
#40	0	0	0	0
#41	0	0	1	1
#42	0	1	1	0
#43	0	0	0	0
#44	0	0	0	0
#45	0	1	1	0
#46	0	0	0	0
#47	0	2	1	0
#48	0	0	0	0
#49	0	0	1	0
