# Supplementary material for: Activity-dependent regulation of mitochondrial motility in developing cortical dendrites
Source: eLife. 2021 Sep 7;10:e62091. doi: 10.7554/eLife.62091 (PMC8423438; doi:10.7554/eLife.62091)
Supplement: Figure 3—source data 5. [file elife-62091-fig3-data5.xlsx]

## Sheet: Sheet1
	Round #	% stopping after - % stopping before	0.05	our data (from previous fig)
	# 1	4.61538	21.0345	27.1296
	# 2	4.32869
	# 3	8.03419
	# 4	20.565
	# 5	11.2338
	# 6	7.21501
	# 7	0.66313
	# 8	5.76803
	# 9	0.0236911
	# 10	17.8908
	# 11	18.2105
	# 12	9.33977
	# 13	10.7635
	# 14	8.9003
	# 15	3.91164
	# 16	6.50573
	# 17	2.05198
	# 18	0.0494805
	# 19	11.1111
	# 20	7.55814
	# 21	-2.88248
	# 22	-0.642312
	# 23	3.44388
	# 24	8.69565
	# 25	1.1563
	# 26	2.09447
	# 27	12.6894
	# 28	15.8607
	# 29	18.1319
	# 30	0.47138
	# 31	25.3813
	# 32	1.53061
	# 33	4.16667
	# 34	11.2787
	# 35	11.3095
	# 36	-5.05952
	# 37	18.5345
	# 38	0
	# 39	23.1313
	# 40	6.52294
	# 41	11.9373
	# 42	10.9527
	# 43	0.59676
	# 44	18.3636
	# 45	3.48008
	# 46	12.1169
	# 47	2.4334
	# 48	10
	# 49	10.0755
	# 50	4.27416
	# 51	7.47045
	# 52	11.7143
	# 53	4.03226
	# 54	5.68182
	# 55	19.2667
	# 56	2.91622
	# 57	16.6667
	# 58	-14.1944
	# 59	11.9327
	# 60	4.29785
	# 61	13.7268
	# 62	21.0345
	# 63	1.96078
	# 64	10.9694
	# 65	21.3424
	# 66	4.62963
	# 67	12.8788
	# 68	2.00952
	# 69	-0.421053
	# 70	7.8125
	# 71	-3.4902
	# 72	10.9787
	# 73	1.22951
	# 74	10.5914
	# 75	5.77664
	# 76	-0.310559
	# 77	35.7038
	# 78	10.6061
	# 79	1.68895
	# 80	12.8084
	# 81	10.4717
	# 82	-7.02797
	# 83	-0.528302
	# 84	3.26797
	# 85	18.4295
	# 86	-9.88819
	# 87	23.6364
	# 88	-2.49322
	# 89	14.5299
	# 90	5.94228
	# 91	13.7681
	# 92	4.2735
	# 93	8.45384
	# 94	13.3333
	# 95	6.96023
	# 96	-0.586941
	# 97	5.90698
	# 98	-0.762746
	# 99	13.2845
	# 100	2.26372
	# 101	7.91209
	# 102	13.2499
	# 103	-0.653595
	# 104	13.1504
	# 105	19.7279
	# 106	8.97656
	# 107	3.63636
	# 108	-1.27273
	# 109	2.72109
	# 110	21.0084
	# 111	-1.96809
	# 112	10.3039
	# 113	19.7492
	# 114	4.2615
	# 115	1.63848
	# 116	18.5816
	# 117	19.78
	# 118	-1.25125
	# 119	15.2542
	# 120	19.5833
	# 121	18.2894
	# 122	19.3093
	# 123	20.4787
	# 124	15.2244
	# 125	11.5546
	# 126	16.5582
	# 127	11.9754
	# 128	12.963
	# 129	-5.06792
	# 130	17.3559
	# 131	5.13208
	# 132	0.634921
	# 133	4.69577
	# 134	-6.99301
	# 135	3.0569
	# 136	12.4461
	# 137	-4.45135
	# 138	-6.38889
	# 139	0.0674082
	# 140	24.8252
	# 141	23.8636
	# 142	2.5641
	# 143	17.2555
	# 144	14.1148
	# 145	-0.336417
	# 146	15.3401
	# 147	0.104493
	# 148	11.1718
	# 149	2.57143
	# 150	0.913978
	# 151	13.2339
	# 152	18.3924
	# 153	6.95217
	# 154	28.3081
	# 155	18.7424
	# 156	-4.61538
	# 157	4.06863
	# 158	3.09414
	# 159	8.21317
	# 160	0.31348
	# 161	20.8852
	# 162	14.2033
	# 163	4.11141
	# 164	8.89749
	# 165	12.1254
	# 166	7.56494
	# 167	13.4848
	# 168	13.0208
	# 169	14.7599
	# 170	15.942
	# 171	14.5178
	# 172	7.01754
	# 173	14.9231
	# 174	12.5786
	# 175	13.6392
	# 176	7.91489
	# 177	10.1099
	# 178	5.58694
	# 179	8.73016
	# 180	9.5935
	# 181	0.4772
	# 182	10.3571
	# 183	7.03704
	# 184	10.5137
	# 185	10.3175
	# 186	4.25806
	# 187	1.20664
	# 188	22.807
	# 189	7.91843
	# 190	33.7446
	# 191	27.7083
	# 192	1.20759
	# 193	5.20833
	# 194	3.125
	# 195	4.59574
	# 196	7.77778
	# 197	8.11073
	# 198	18.0815
	# 199	4.90716
	# 200	13.2138
	# 201	13.8837
	# 202	10.7857
	# 203	-8.01056
	# 204	17.3407
	# 205	15.6187
	# 206	17.2153
	# 207	6.99797
	# 208	14.5109
	# 209	7.85414
	# 210	8.3027
	# 211	12.5
	# 212	14.8737
	# 213	12.234
	# 214	0.985222
	# 215	5.75758
	# 216	10.9091
	# 217	5.52309
	# 218	-0.634921
	# 219	2.17391
	# 220	15.0567
	# 221	11.0273
	# 222	5.94703
	# 223	5.85914
	# 224	13.5628
	# 225	10.8316
	# 226	7.19722
	# 227	17.542
	# 228	11.9013
	# 229	-6.75039
	# 230	4.15793
	# 231	12.7692
	# 232	8.61522
	# 233	16.1409
	# 234	15.8154
	# 235	15.2174
	# 236	12.8033
	# 237	15.8065
	# 238	0.770308
	# 239	14.8601
	# 240	20.271
	# 241	-3.94737
	# 242	0.153846
	# 243	15.5423
	# 244	13.8983
	# 245	13.3333
	# 246	12.0668
	# 247	11.0695
	# 248	12.1986
	# 249	17.9894
	# 250	4.4898
	# 251	17.0576
	# 252	7.77778
	# 253	2.74443
	# 254	11.6312
	# 255	15.9487
	# 256	6.16915
	# 257	2.125
	# 258	6.0771
	# 259	4.65839
	# 260	6.08544
	# 261	5.02874
	# 262	-7.31917
	# 263	-5.96433
	# 264	-8.41389
	# 265	11.7172
	# 266	2.11065
	# 267	-1.99617
	# 268	2.12716
	# 269	-1.78571
	# 270	2.79058
	# 271	5.08386
	# 272	14.8767
	# 273	1.42857
	# 274	0
	# 275	16.3955
	# 276	6.2585
	# 277	19.3815
	# 278	8.90218
	# 279	5.28139
	# 280	14.8399
	# 281	13.5305
	# 282	5.37255
	# 283	4.37788
	# 284	11.5148
	# 285	15.1279
	# 286	5.77393
	# 287	10.0508
	# 288	1.78799
	# 289	4.32692
	# 290	9.60591
	# 291	2.02059
	# 292	-12.1429
	# 293	-4.83944
	# 294	15.1261
	# 295	13.3529
	# 296	17.759
	# 297	15.1568
	# 298	18.75
	# 299	17.7229
	# 300	13.1907
	# 301	10.2218
	# 302	8.93305
	# 303	0.160256
	# 304	12.069
	# 305	5.26055
	# 306	12.3191
	# 307	-2.32323
	# 308	4.85893
	# 309	9.92908
	# 310	10
	# 311	4.28157
	# 312	7.24493
	# 313	15.8654
	# 314	7.18954
	# 315	18.8187
	# 316	9.07407
	# 317	5.3288
	# 318	8.58696
	# 319	6.76471
	# 320	9.3692
	# 321	13.3846
	# 322	12
	# 323	5.30531
	# 324	14.6032
	# 325	-2.98143
	# 326	-5.63636
	# 327	-5.05051
	# 328	-4.62185
	# 329	7.8125
	# 330	5.62771
	# 331	22.9947
	# 332	-3.64613
	# 333	1.88679
	# 334	19.6488
	# 335	-3.01659
	# 336	14.3029
	# 337	5.11936
	# 338	3.66379
	# 339	14.1371
	# 340	1.69082
	# 341	15.4762
	# 342	5.16154
	# 343	7.85256
	# 344	4.13793
	# 345	1.61421
	# 346	10.1092
	# 347	5.77441
	# 348	7.40741
	# 349	6.81818
	# 350	7.71429
	# 351	1.69133
	# 352	8.33333
	# 353	6.44928
	# 354	1.99693
	# 355	13.0567
	# 356	6.23529
	# 357	9.16844
	# 358	10.8295
	# 359	4.39883
	# 360	10.8844
	# 361	11.4043
	# 362	4.31689
	# 363	9.64912
	# 364	6.5942
	# 365	2.92683
	# 366	11.2022
	# 367	6.90395
	# 368	7.79727
	# 369	-1.52555
	# 370	12.6078
	# 371	9.48949
	# 372	20.5357
	# 373	-6.66667
	# 374	7.03405
	# 375	21.9262
	# 376	14.8184
	# 377	18.4376
	# 378	9.40401
	# 379	13.9686
	# 380	22.9102
	# 381	5.16667
	# 382	12.782
	# 383	18.784
	# 384	8.68687
	# 385	15.7895
	# 386	11.5546
	# 387	10.5993
	# 388	7.58808
	# 389	2.19298
	# 390	12.38
	# 391	2.6455
	# 392	9.29065
	# 393	11.025
	# 394	8.06907
	# 395	8.81226
	# 396	19.9523
	# 397	-7.08333
	# 398	4.45931
	# 399	22.6757
	# 400	7.54505
	# 401	19.6841
	# 402	8.6087
	# 403	9.54505
	# 404	-6.25
	# 405	16.9565
	# 406	0.909091
	# 407	12.7778
	# 408	-1.97133
	# 409	16.489
	# 410	13.7395
	# 411	9.58621
	# 412	4.94931
	# 413	5.04902
	# 414	20.8095
	# 415	4
	# 416	1.22951
	# 417	21.9462
	# 418	6.02679
	# 419	20.8483
	# 420	-8.31228
	# 421	3.84226
	# 422	8.33333
	# 423	13.7009
	# 424	8.45588
	# 425	-0.227273
	# 426	6.52669
	# 427	12.8852
	# 428	10.562
	# 429	-0.645161
	# 430	-0.989011
	# 431	16.8473
	# 432	11.1192
	# 433	8.62027
	# 434	12.9944
	# 435	10.1809
	# 436	13.8562
	# 437	17.7447
	# 438	-4.99569
	# 439	18.2692
	# 440	10.9091
	# 441	1.41439
	# 442	24.943
	# 443	6.57143
	# 444	7.29419
	# 445	-5.94203
	# 446	12.7451
	# 447	2.36256
	# 448	9.58606
	# 449	13.4965
	# 450	9.44444
	# 451	20.2866
	# 452	15.364
	# 453	9.44444
	# 454	-9.7561
	# 455	-5.26902
	# 456	21.2008
	# 457	6.27943
	# 458	-0.842572
	# 459	13.591
	# 460	10.7769
	# 461	25.3991
	# 462	3.90698
	# 463	4.884
	# 464	6.70996
	# 465	21.3508
	# 466	20.3125
	# 467	9.71897
	# 468	22.0779
	# 469	9.66749
	# 470	6.29944
	# 471	-1.74419
	# 472	0.627943
	# 473	2.12766
	# 474	2.41935
	# 475	10.3409
	# 476	4.60526
	# 477	13.8182
	# 478	10.6397
	# 479	4.48029
	# 480	1.36452
	# 481	18.1617
	# 482	10.1672
	# 483	5.18395
	# 484	-2.17033
	# 485	-5.1797
	# 486	30.705
	# 487	3.41715
	# 488	20.7609
	# 489	20.8851
	# 490	3.71199
	# 491	8.44444
	# 492	5.29551
	# 493	13.7077
	# 494	34.4444
	# 495	14.0762
	# 496	8.62167
	# 497	14.2069
	# 498	9.81241
	# 499	13.1554
	# 500	9.09091
	# 501	-1.06101
	# 502	-1.87135
	# 503	-2.84553
	# 504	1.80375
	# 505	7.60803
	# 506	8.97436
	# 507	12.9658
	# 508	-3.17019
	# 509	4.15959
	# 510	14.7672
	# 511	6.52516
	# 512	5.28169
	# 513	16.9565
	# 514	12.4314
	# 515	0
	# 516	3.25662
	# 517	5.72973
	# 518	2.75519
	# 519	8.33333
	# 520	7.59184
	# 521	3.34821
	# 522	12.5
	# 523	20.269
	# 524	3.05144
	# 525	16.1051
	# 526	11.3782
	# 527	2.76997
	# 528	1.46406
	# 529	10.3305
	# 530	20.8852
	# 531	15.0152
	# 532	15.63
	# 533	13.027
	# 534	2.00669
	# 535	10.3641
	# 536	15.4127
	# 537	1.42857
	# 538	10.4004
	# 539	20.2899
	# 540	25.1351
	# 541	15.5556
	# 542	4.27897
	# 543	9.89044
	# 544	1.75549
	# 545	20.8125
	# 546	0.448796
	# 547	5.82625
	# 548	17.2727
	# 549	8.23245
	# 550	2.45654
	# 551	-2.66876
	# 552	19.7884
	# 553	6.11664
	# 554	14.5125
	# 555	8.23032
	# 556	12.3904
	# 557	9.88836
	# 558	19.6104
	# 559	3.14685
	# 560	0.874811
	# 561	7.71961
	# 562	-1.92308
	# 563	21.3167
	# 564	4.96894
	# 565	18.7155
	# 566	15.7986
	# 567	28.9683
	# 568	11.2245
	# 569	25.2624
	# 570	5.26316
	# 571	-5.41065
	# 572	2.09302
	# 573	31.6667
	# 574	11.2462
	# 575	14.2271
	# 576	4.25287
	# 577	8.33333
	# 578	9.96426
	# 579	10.3635
	# 580	6.26598
	# 581	6.25
	# 582	10.9231
	# 583	0.873138
	# 584	7.73619
	# 585	10.8214
	# 586	5.6541
	# 587	16.2393
	# 588	23.7852
	# 589	6.36364
	# 590	4.01003
	# 591	8.95876
	# 592	8.78378
	# 593	0.581395
	# 594	26.8879
	# 595	20.4082
	# 596	1.93705
	# 597	12.1041
	# 598	4.48796
	# 599	3.80201
	# 600	11.7101
	# 601	6.90486
	# 602	4.28189
	# 603	9.8078
	# 604	3.06122
	# 605	2.71132
	# 606	2.40816
	# 607	10.2277
	# 608	3.84615
	# 609	-0.664137
	# 610	12.7776
	# 611	10.9091
	# 612	9.68007
	# 613	-8.54701
	# 614	13.4167
	# 615	16.3247
	# 616	6.56555
	# 617	12.6667
	# 618	0.224888
	# 619	8.18182
	# 620	7.60234
	# 621	4.73531
	# 622	7.74172
	# 623	7.5
	# 624	2.86595
	# 625	-3.41667
	# 626	14.966
	# 627	23.7069
	# 628	7.70146
	# 629	-0.854701
	# 630	2.19711
	# 631	3.03388
	# 632	14.6675
	# 633	15.8883
	# 634	10.1063
	# 635	22.2353
	# 636	14.3297
	# 637	0.0301659
	# 638	-1.92308
	# 639	-3.29395
	# 640	9.69388
	# 641	26.2755
	# 642	0.724638
	# 643	9.98024
	# 644	17.041
	# 645	16.7349
	# 646	25.7253
	# 647	-0.10989
	# 648	10.8115
	# 649	22.0656
	# 650	14.4961
	# 651	-0.933933
	# 652	9.07112
	# 653	9.27406
	# 654	10.5167
	# 655	5.61941
	# 656	-6.33075
	# 657	3.74332
	# 658	16.5362
	# 659	9.29241
	# 660	15
	# 661	10.4377
	# 662	5.08961
	# 663	0.070922
	# 664	-1.14416
	# 665	6.48148
	# 666	-0.042735
	# 667	9.98464
	# 668	15.9091
	# 669	4.25532
	# 670	17.9243
	# 671	15.1478
	# 672	1.49188
	# 673	3.62963
	# 674	-6.04575
	# 675	21.8211
	# 676	2.58065
	# 677	14.7581
	# 678	11.7505
	# 679	5.23256
	# 680	1.97006
	# 681	15.5952
	# 682	14.7059
	# 683	6.69988
	# 684	7.70146
	# 685	10.6154
	# 686	3.34606
	# 687	5.68421
	# 688	14.7813
	# 689	-1.15207
	# 690	-4.26087
	# 691	25
	# 692	15.4509
	# 693	7.91843
	# 694	4.31163
	# 695	13.8932
	# 696	7.61905
	# 697	12.4152
	# 698	4.5283
	# 699	-1.41414
	# 700	17.0189
	# 701	10.4004
	# 702	4.12014
	# 703	16.7558
	# 704	1.75219
	# 705	12.8205
	# 706	20.865
	# 707	4.44444
	# 708	-2.22701
	# 709	8.35913
	# 710	-1.77778
	# 711	13.3929
	# 712	-4.37788
	# 713	12.7451
	# 714	-8.23529
	# 715	11.1111
	# 716	6.14286
	# 717	6.9281
	# 718	7.97074
	# 719	8.883
	# 720	9.52941
	# 721	7.36559
	# 722	15.7049
	# 723	7.45951
	# 724	4.69269
	# 725	9.17508
	# 726	0.974843
	# 727	-6.07018
	# 728	0.555556
	# 729	14.7858
	# 730	6.92683
	# 731	9.55882
	# 732	20.5201
	# 733	18
	# 734	14
	# 735	10.3896
	# 736	-1.81818
	# 737	11.7347
	# 738	-15.6863
	# 739	10.9091
	# 740	9.31713
	# 741	0.34188
	# 742	22.488
	# 743	-12.4717
	# 744	10.4167
	# 745	12.8715
	# 746	0.234604
	# 747	12
	# 748	7.60369
	# 749	10.1587
	# 750	10.3297
	# 751	4.99182
	# 752	8.33333
	# 753	11.3208
	# 754	0.71568
	# 755	16.9643
	# 756	5
	# 757	3.84615
	# 758	3.99516
	# 759	21.8452
	# 760	-6.03448
	# 761	11.8182
	# 762	18.141
	# 763	10.5048
	# 764	2.18579
	# 765	5.5336
	# 766	12.2024
	# 767	4.45969
	# 768	14.4665
	# 769	13.7143
	# 770	5.25847
	# 771	10.7772
	# 772	21.3043
	# 773	17.144
	# 774	19.8235
	# 775	3.74707
	# 776	2.03762
	# 777	6.66464
	# 778	10.7527
	# 779	13.4128
	# 780	5.41667
	# 781	1.40554
	# 782	16.5718
	# 783	14.8956
	# 784	3.68782
	# 785	8.98693
	# 786	11.274
	# 787	16.4828
	# 788	-11.6987
	# 789	21
	# 790	11.6066
	# 791	-8.18452
	# 792	8.23137
	# 793	5.14129
	# 794	13.9379
	# 795	20.51
	# 796	9.90783
	# 797	5.03247
	# 798	16.3957
	# 799	20.9488
	# 800	13.0635
	# 801	3.38016
	# 802	9.04718
	# 803	22.5397
	# 804	-4.57627
	# 805	8.63487
	# 806	7.69231
	# 807	13.6364
	# 808	7.35332
	# 809	12.0811
	# 810	18.3537
	# 811	3.10078
	# 812	8.39002
	# 813	8.62409
	# 814	6.00329
	# 815	10.7692
	# 816	9.69351
	# 817	16.1494
	# 818	0
	# 819	-3.71795
	# 820	14.5833
	# 821	5
	# 822	7.89562
	# 823	13.4259
	# 824	9.59762
	# 825	4.24837
	# 826	-3.87097
	# 827	12.0743
	# 828	23.1111
	# 829	-6.25423
	# 830	17.037
	# 831	7.61456
	# 832	17.9487
	# 833	4.09091
	# 834	2.61525
	# 835	13.3333
	# 836	11.9826
	# 837	-8.97616
	# 838	17.2619
	# 839	14.6856
	# 840	11.6014
	# 841	11.5862
	# 842	19.4211
	# 843	-0.860215
	# 844	1.45688
	# 845	0.288018
	# 846	-9.57021
	# 847	14.2857
	# 848	-1.92593
	# 849	6.28079
	# 850	-2.57143
	# 851	13.9403
	# 852	25.6667
	# 853	10.2918
	# 854	-8.9539
	# 855	18.5253
	# 856	9.25926
	# 857	10.4167
	# 858	-8.17308
	# 859	9.80243
	# 860	-4.58547
	# 861	2.47059
	# 862	1.68278
	# 863	9.55376
	# 864	21.5385
	# 865	-2.48447
	# 866	8.78571
	# 867	6.81004
	# 868	2.72045
	# 869	13.6364
	# 870	12.069
	# 871	5.70175
	# 872	4.20875
	# 873	-5.76923
	# 874	16.0225
	# 875	9.0081
	# 876	0
	# 877	10.7394
	# 878	4.02494
	# 879	-3.66718
	# 880	2.33947
	# 881	15.6513
	# 882	6.65984
	# 883	16.1232
	# 884	7.22222
	# 885	11.3426
	# 886	17.6471
	# 887	3.4965
	# 888	3.38196
	# 889	5.62728
	# 890	8
	# 891	14.9123
	# 892	8.19672
	# 893	3.06527
	# 894	16.8067
	# 895	23.6398
	# 896	13.7073
	# 897	19.0385
	# 898	8.88889
	# 899	27.6768
	# 900	18.4751
	# 901	-3.61498
	# 902	5.35714
	# 903	12.1939
	# 904	-1.59574
	# 905	7.62987
	# 906	11.3333
	# 907	0.846154
	# 908	-12.6087
	# 909	8.39883
	# 910	9.24838
	# 911	5.91954
	# 912	2
	# 913	1.78571
	# 914	0.101215
	# 915	12.8763
	# 916	2.90046
	# 917	0.581395
	# 918	-3.58505
	# 919	12.4681
	# 920	14.6027
	# 921	7.72059
	# 922	7.18641
	# 923	26.1702
	# 924	12.3249
	# 925	2.33266
	# 926	19.6154
	# 927	-0.25641
	# 928	3.06941
	# 929	24.1922
	# 930	11.4474
	# 931	15.0929
	# 932	13.1489
	# 933	20.4828
	# 934	10.1534
	# 935	10.3998
	# 936	10.4618
	# 937	20.2972
	# 938	9.04378
	# 939	0.0921659
	# 940	10.3145
	# 941	3.0012
	# 942	2.77361
	# 943	11.2877
	# 944	14.437
	# 945	4.13925
	# 946	14.9309
	# 947	17.3862
	# 948	12.2559
	# 949	16.6667
	# 950	-1.3805
	# 951	20.6297
	# 952	14.8462
	# 953	8.92857
	# 954	-2.66106
	# 955	8.46154
	# 956	9.84035
	# 957	3.96491
	# 958	8.80503
	# 959	11.0649
	# 960	14.1146
	# 961	-1.65119
	# 962	10.6838
	# 963	13.3333
	# 964	15.5251
	# 965	15.3959
	# 966	2.69021
	# 967	1.34965
	# 968	-3.25767
	# 969	4.65219
	# 970	11.7424
	# 971	1.95185
	# 972	11.7443
	# 973	17.5837
	# 974	15.9811
	# 975	7.77778
	# 976	-0.862069
	# 977	7.35786
	# 978	12.2881
	# 979	35.5401
	# 980	6.76343
	# 981	10.1173
	# 982	5.4395
	# 983	22.3831
	# 984	-7.70732
	# 985	16.1859
	# 986	-3.60223
	# 987	3.78723
	# 988	1.78571
	# 989	15.5594
	# 990	7.21429
	# 991	19.4989
	# 992	0.567992
	# 993	5.71429
	# 994	17.0696
	# 995	-1.89024
	# 996	-3.57895
	# 997	6.66667
	# 998	4.91453
	# 999	15.4037
	# 1000	15.3429
