# Supplementary material for: Activity-dependent regulation of mitochondrial motility in developing cortical dendrites
Source: eLife. 2021 Sep 7;10:e62091. doi: 10.7554/eLife.62091 (PMC8423438; doi:10.7554/eLife.62091)
Supplement: Figure 3—source data 6. [file elife-62091-fig3-data6.xlsx]

## Sheet: Sheet1
Interval (s)	Distance (um)	Effect
40	1	13.0326
40	2	10.8951
40	3	6.39517
40	4	3.27374
40	5	1.29342
40	6	3.20911
40	7	1.96078
40	8	5.0152
40	9	4.85741
40	10	5.46542
40	11	4.80047
40	12	3.8118
40	13	1.78025
40	14	1.03788
40	15	1.00319
40	16	1.50754
40	17	1.43541
40	18	0.930233
40	19	0.440529
40	20	0.41841
60	1	8.59564
60	2	8.31608
60	3	6.31926
60	4	5.90728
60	5	4.38596
60	6	5.66138
60	7	3.81016
60	8	6.19874
60	9	6.17159
60	10	3.00334
60	11	2.57048
60	12	1.83544
60	13	-0.111509
60	14	-0.723494
60	15	-0.691554
60	16	-0.106892
60	17	-0.0810081
60	18	-0.0204851
60	19	-0.44843
60	20	-0.429185
80	1	25.4545
80	2	18.5066
80	3	13.936
80	4	12.6388
80	5	8.56164
80	6	11.2128
80	7	6.34254
80	8	8.37942
80	9	7.45267
80	10	4.16331
80	11	3.67019
80	12	2.92572
80	13	1.00632
80	14	0.370667
80	15	0.428518
80	16	0.938967
80	17	0.44843
80	18	0
80	19	0
80	20	0
100	1	24.898
100	2	20.1136
100	3	14.504
100	4	15.5882
100	5	11.0019
100	6	11.93
100	7	7.43916
100	8	8.93873
100	9	8.85687
100	10	5.52754
100	11	5.86391
100	12	4.17625
100	13	1.65009
100	14	1.00609
100	15	0.989432
100	16	0.952381
100	17	0.456621
100	18	0
100	19	0
100	20	0
120	1	27.1296
120	2	24.4444
120	3	20.8483
120	4	19.7696
120	5	12.4801
120	6	13.0597
120	7	7.41602
120	8	11.437
120	9	9.93814
120	10	6.14732
120	11	6.65966
120	12	5.22764
120	13	2.14667
120	14	1.28403
120	15	0.585551
120	16	0.588235
120	17	0.564972
120	18	0
120	19	0
120	20	0
