# Supplementary material for: Activity-dependent regulation of mitochondrial motility in developing cortical dendrites
Source: eLife. 2021 Sep 7;10:e62091. doi: 10.7554/eLife.62091 (PMC8423438; doi:10.7554/eLife.62091)
Supplement: Figure 3—source data 7. [file elife-62091-fig3-data7.xlsx]

## Sheet: Sheet1
Interval (s)	Distance (um)	p value
40	1	0.0648652
40	2	0.134283
40	3	0.334458
40	4	0.543288
40	5	0.757839
40	6	0.41043
40	7	0.501326
40	8	0.0590222
40	9	0.0530931
40	10	0.0208953
40	11	0.0225671
40	12	0.0367971
40	13	0.172908
40	14	0.326089
40	15	0.326632
40	16	0.108809
40	17	0.106407
40	18	0.177123
40	19	0.34927
40	20	0.348709
60	1	0.210196
60	2	0.257795
60	3	0.339303
60	4	0.311909
60	5	0.382114
60	6	0.222701
60	7	0.267274
60	8	0.043327
60	9	0.0326335
60	10	0.187945
60	11	0.193938
60	12	0.288505
60	13	0.928716
60	14	0.462638
60	15	0.37417
60	16	0.880334
60	17	0.903448
60	18	0.96382
60	19	0
60	20	0
80	1	2.95562e-05
80	2	0.00656786
80	3	0.0312227
80	4	0.0316862
80	5	0.0911536
80	6	0.0177934
80	7	0.0760072
80	8	0.0100792
80	9	0.0110536
80	10	0.0791201
80	11	0.0760078
80	12	0.0928904
80	13	0.422195
80	14	0.708883
80	15	0.584662
80	16	0.189036
80	17	0.347413
80	18	NaN
80	19	NaN
80	20	NaN
90	1	2.83314e-06
90	2	0.00468516
90	3	0.0531235
90	4	0.0295201
90	5	0.0711558
90	6	0.0364698
90	7	0.102358
90	8	0.0134943
90	9	0.016469
90	10	0.126149
90	11	0.0531348
90	12	0.0761079
90	13	0.383652
90	14	0.641138
90	15	0.536763
90	16	0.174318
90	17	0.333442
90	18	NaN
90	19	NaN
90	20	NaN
100	1	1.31771e-05
100	2	0.00191588
100	3	0.0209471
100	4	0.00797508
100	5	0.0306821
100	6	0.0137755
100	7	0.0513033
100	8	0.00851768
100	9	0.004277
100	10	0.0341048
100	11	0.0116617
100	12	0.0281333
100	13	0.219748
100	14	0.362909
100	15	0.287272
100	16	0.173114
100	17	0.332183
100	18	NaN
100	19	NaN
100	20	NaN
120	1	2.04181e-05
120	2	0.000504218
120	3	0.00213734
120	4	0.00202777
120	5	0.0233711
120	6	0.0135601
120	7	0.0577562
120	8	0.00169268
120	9	0.00259507
120	10	0.0229354
120	11	0.00581223
120	12	0.0132211
120	13	0.140034
120	14	0.26631
120	15	0.525401
120	16	0.335124
120	17	0.332922
120	18	NaN
120	19	NaN
120	20	NaN
