# Supplementary material for: Activity-dependent regulation of mitochondrial motility in developing cortical dendrites
Source: eLife. 2021 Sep 7;10:e62091. doi: 10.7554/eLife.62091 (PMC8423438; doi:10.7554/eLife.62091)
Supplement: Figure 3—source data 8. [file elife-62091-fig3-data8.xlsx]

## Sheet: Sheet1
Mitochondrion	Condition	Time stamp stopped	Time stamp resumed movement (* if ==350, end of recording)	Arrest duration
#1	motility resumed	196.7	203	6.3
#2	motility resumed	196	203.35	7.35
#3	motility resumed	219.45	226.45	7
#4	underestimation	157.5	350	192.5
#5	underestimation	224	350	126
#6	underestimation	232.05	350	117.95
#7	motility resumed	218.75	240.1	21.35
#8	motility resumed	234.15	253.4	19.25
#9	underestimation	257.95	350	92.05
#10	motility resumed	233.8	253.75	19.95
#11	underestimation	258.3	350	91.7
#12	underestimation	262.15	350	87.85
#13	motility resumed	186.9	195.3	8.4
#14	motility resumed	196.7	218.05	21.35
#15	motility resumed	223.65	325.5	101.85
#16	motility resumed	196.7	218.4	21.7
#17	motility resumed	223.3	325.5	102.2
#18	underestimation	182	350	168
#19	underestimation	182	350	168
#20	motility resumed	228.9	238.35	9.45
#21	motility resumed	228.9	238.7	9.8
#22	motility resumed	236.95	339.5	102.55
#23	motility resumed	182.35	193.9	11.55
#24	motility resumed	196.35	309.4	113.05
