# Supplementary material for: Activity-dependent regulation of mitochondrial motility in developing cortical dendrites
Source: eLife. 2021 Sep 7;10:e62091. doi: 10.7554/eLife.62091 (PMC8423438; doi:10.7554/eLife.62091)
Supplement: Figure 4—source data 1. [file elife-62091-fig4-data1.xlsx]

## Sheet: Sheet1
Experiment	Age slices obtained	DIVs	age	Mitos_moving % 2 min before	Mitos_moving % 2 min after KCl
67a	P5	5	10	19.4919	4.23773
67b	P5	5	10	12.9177	14.8462
68a	P5	4	9	3.14815	0
68b	P5	4	9	12.753	6.61994
68c	P5	4	9	8.5506	0.954106
69a	P5	7	12	3.91835	2.53968
69b	P5	7	12	0.462963	0
72b	P5	4	9	11.6908	6.21002

## Sheet: Sheet1 (2)
	Date_Time	Experiment	Recording	Condition	Frq_global_ca_transients	Mitos_moving	Delta_F (%)	LTX_time	Time_rel_LTX (min)
0	2019-07-29 16:47:00	MA01a	1	Baseline	0.2	5.81	-11.7002	2019-07-29 18:25:00	-98
1	2019-07-29 17:04:00	MA01a	2	Baseline	0	6.87	-32.7013	2019-07-29 18:25:00	-81
2	2019-07-29 17:16:00	MA01a	3	Baseline	0.5	8.59	44.4015	2019-07-29 18:25:00	-69
3	2019-07-29 17:40:00	MA01a	4	TTX	0	3.17	-42.0966	2019-07-29 18:25:00	-45
4	2019-07-29 17:50:00	MA01a	5	TTX	0	6.5	-38.5314	2019-07-29 18:25:00	-35
5	2019-07-29 18:00:00	MA01a	6	TTX	0	3.91	-38.3253	2019-07-29 18:25:00	-25
6	2019-07-29 18:10:00	MA01a	7	Wash in LTX	0	4.69	-43.5076	2019-07-29 18:25:00	-15
7	2019-07-29 18:26:00	MA01a	8	Wash in LTX	0.5	2.97	32.2255	2019-07-29 18:25:00	1
8	2019-07-29 18:34:00	MA01a	9	TTX + Latrotoxin	0	0.31	533.546	2019-07-29 18:25:00	9
9	2019-07-29 18:46:00	MA01a	10	TTX + Latrotoxin	0	0	125.688	2019-07-29 18:25:00	21
10	2019-07-29 18:55:00	MA01a	11	Wash out LTX	0	0	93.6595	2019-07-29 18:25:00	30
11	2019-07-29 19:05:00	MA01a	12	TTX	0	0	-44.7125	2019-07-29 18:25:00	40
12	2019-07-31 11:11:00	MA02a	1	Baseline	0.2	7.94	8.49793	2019-07-31 13:05:00	-114
13	2019-07-31 11:56:00	MA02a	2	Baseline	0.2	3.48	-3.90117	2019-07-31 13:05:00	-69
14	2019-07-31 12:03:00	MA02a	3	Baseline	0	5.29	-4.59676	2019-07-31 13:05:00	-62
15	2019-07-31 12:33:00	MA02a	4	TTX	0	7.45	-20.6826	2019-07-31 13:05:00	-32
16	2019-07-31 12:43:00	MA02a	5	TTX	0	5.7	-17.5423	2019-07-31 13:05:00	-22
17	2019-07-31 12:53:00	MA02a	6	TTX	0	7.11	-14.8603	2019-07-31 13:05:00	-12
18	2019-07-31 13:07:00	MA02a	7	Wash in LTX	0	4.83	-45.3626	2019-07-31 13:05:00	2
19	2019-07-31 13:13:00	MA02a	8	Wash in LTX	0	1.96	-45.3626	2019-07-31 13:05:00	8
20	2019-07-31 13:23:00	MA02a	9	TTX + Latrotoxin	0	1.37	-66.1746	2019-07-31 13:05:00	18
21	2019-07-31 13:33:00	MA02a	10	TTX + Latrotoxin	0	1.6	-65.4519	2019-07-31 13:05:00	28
22	2019-07-31 14:14:00	MA02a	11	Wash out LTX	0	6.71	-42.7318	2019-07-31 13:05:00	69
23	2019-07-31 14:24:00	MA02a	12	TTX	0	8.4	-36.7873	2019-07-31 13:05:00	79
24	2019-07-31 15:21:00	MA02b	1	Baseline	0.2	10.47	-14.2626	2019-07-31 16:56:00	-95
25	2019-07-31 15:55:00	MA02b	2	Baseline	0.3	7.93	28.7567	2019-07-31 16:56:00	-61
26	2019-07-31 16:05:00	MA02b	3	Baseline	0.3	8.76	-14.4941	2019-07-31 16:56:00	-51
27	2019-07-31 16:22:00	MA02b	4	TTX	0	10.93	0.517547	2019-07-31 16:56:00	-34
28	2019-07-31 16:33:00	MA02b	5	TTX	0	11.14	8.45762	2019-07-31 16:56:00	-23
29	2019-07-31 16:44:00	MA02b	6	Wash in LTX	0	9.23	-21.363	2019-07-31 16:56:00	-12
30	2019-07-31 16:58:00	MA02b	7	Wash in LTX	0	7.84	81.6288	2019-07-31 16:56:00	2
31	2019-07-31 17:04:00	MA02b	8	TTX + Latrotoxin	0	1.47	81.6288	2019-07-31 16:56:00	8
32	2019-07-31 17:14:00	MA02b	9	TTX + Latrotoxin	0	0	-55.3961	2019-07-31 16:56:00	18
33	2019-07-31 17:24:00	MA02b	10	TTX + Latrotoxin	0	0	-39.3962	2019-07-31 16:56:00	28
34	2019-07-31 17:36:00	MA02b	11	Wash out LTX	0	0.43	-41.0402	2019-07-31 16:56:00	40
35	2019-07-31 18:22:00	MA02b	12	TTX	0	3.81	-32.9135	2019-07-31 16:56:00	86
36	2019-07-31 18:48:00	MA02b	13	Wash out TTX	0	2.27	-66.4337	2019-07-31 16:56:00	112
37	2019-07-31 19:02:00	MA02b	14	Wash out TTX	0.5	1.62	-55.2663	2019-07-31 16:56:00	126
38	2019-08-01 11:20:00	MA03a	1	Baseline	0.3	3.36	3.63046	2019-08-01 12:47:00	-87
39	2019-08-01 11:33:00	MA03a	2	Baseline	0.7	3.15	-23.6369	2019-08-01 12:47:00	-74
40	2019-08-01 11:43:00	MA03a	3	Baseline	0.5	4.59	20.0065	2019-08-01 12:47:00	-64
41	2019-08-01 12:19:00	MA03a	4	TTX	0	3.22	-31.7691	2019-08-01 12:47:00	-28
42	2019-08-01 12:29:00	MA03a	5	TTX	0	5.06	-30.2463	2019-08-01 12:47:00	-18
43	2019-08-01 12:39:00	MA03a	6	TTX	0	5.35	-30.0268	2019-08-01 12:47:00	-8
44	2019-08-01 12:49:00	MA03a	7	Wash in LTX	0.2	0.97	136.865	2019-08-01 12:47:00	2
45	2019-08-01 12:55:00	MA03a	8	Wash in LTX	0.3	0	136.865	2019-08-01 12:47:00	8
46	2019-08-01 13:06:00	MA03a	9	TTX + Latrotoxin	0	0	-46.1338	2019-08-01 12:47:00	19
47	2019-08-01 13:16:00	MA03a	10	TTX + Latrotoxin	0	0	-89.0765	2019-08-01 12:47:00	29
48	2019-08-01 13:57:00	MA03a	11	Wash out LTX	0	2.35	-71.3083	2019-08-01 12:47:00	70
49	2019-08-01 14:07:00	MA03a	12	TTX	0	2.56	-75.9524	2019-08-01 12:47:00	80
50	2019-08-01 15:18:00	MA03b	1	Baseline	0.2	2.17	9.40501	2019-08-01 16:28:00	-70
51	2019-08-01 15:30:00	MA03b	2	Baseline	0.3	1.94	23.1653	2019-08-01 16:28:00	-58
52	2019-08-01 15:40:00	MA03b	3	Baseline	0.5	1.01	-32.5703	2019-08-01 16:28:00	-48
53	2019-08-01 16:00:00	MA03b	4	TTX	0	2.47	-32.1073	2019-08-01 16:28:00	-28
54	2019-08-01 16:09:00	MA03b	5	TTX	0	2.72	-43.9968	2019-08-01 16:28:00	-19
55	2019-08-01 16:20:00	MA03b	6	Wash in LTX	0	3.13	-46.5642	2019-08-01 16:28:00	-8
56	2019-08-01 16:30:00	MA03b	7	Wash in LTX	0	2.76	-61.6489	2019-08-01 16:28:00	2
57	2019-08-01 16:36:00	MA03b	8	TTX + Latrotoxin	0	1.19	-61.6489	2019-08-01 16:28:00	8
58	2019-08-01 16:47:00	MA03b	9	TTX + Latrotoxin	0.2	0	-79.9678	2019-08-01 16:28:00	19
59	2019-08-01 16:57:00	MA03b	10	TTX + Latrotoxin	0	0	-9.31191	2019-08-01 16:28:00	29
60	2019-08-01 17:15:00	MA03b	11	Wash out LTX	0	0	-87.3224	2019-08-01 16:28:00	47
61	2019-08-01 17:54:00	MA03b	12	TTX	0	0	-90.5463	2019-08-01 16:28:00	86
62	2019-08-01 18:04:00	MA03b	13	TTX	0	0	-89.8765	2019-08-01 16:28:00	96
