# Supplementary material for: Activity-dependent regulation of mitochondrial motility in developing cortical dendrites
Source: eLife. 2021 Sep 7;10:e62091. doi: 10.7554/eLife.62091 (PMC8423438; doi:10.7554/eLife.62091)
Supplement: Figure 4—source data 3. [file elife-62091-fig4-data3.xlsx]

## Sheet: Sheet 1
Triggered transient	Mitos_moving % 2 min before	Mitos_moving % 2 min after glutamate
#1	0	6.27525
#2	3.76653	4.24505
#3	1.32184	4.57235
#4	1.5778	3.51961
#5	1.57407	0
#6	18.3452	1.23049
#7	3.98148	6.88576
#8	2.22222	3.0303
#9	3.15657	5.09642
#10	2.22222	0
#11	3.05556	0
#12	9.2803	1.23967
#13	0	0
#14	3.61574	13.2828
#15	8.98016	7.83419
#16	5.25862	14.5159
#17	9.80057	11.8254
#18	62.037	64.6465
#19	33.5714	26.7034
#20	41.5817	17.1753
#21	3.86574	0.757576
#22	100	11.6071
#23	11.048	38.9807
#24	20.3009	1.65289
#25	9.96495	13.2437
#26	8.46396	9.44809
#27	18.3735	12.1904
#28	16.4375	13.8422
#29	5.68519	10.2984
#30	5.30844	5.57392
#31	4.49802	25.7035
#32	4.56404	10.7415
#33	17.1631	3.76427
#34	9.60351	11.4726
#35	16.7672	0.50833
#36	9.23843	9.8659
#37	2.22222	0
#38	100	8.81543
#39	4.29293	2.61708
#40	3.33333	6.16477
#41	10.8082	4.43067
#42	4.44444	8.33333
#43	3.48148	8.26948
#44	7.37963	3.92562
#45	2.68939	9.16896
#46	2.98501	3.87678
#47	22.5379	0
#48	3.87597	2.61708
#49	4.83796	13.1471
#50	12.7029	4.05418
#51	7.01387	0.896184
#52	0	0.825083
#53	1.14943	1.35445
#54	0	0
#55	0.833333	0
#56	4.46759	0.998623
#57	2.49042	0
#58	0	0
#59	5.625	7.27273
#60	0.790123	1.89011
#61	4.26587	11.7336
#62	5.48836	8.66433
#63	0	5.3719
#64	3.24509	6.91491
#65	4.78836	2.59358
#66	2.24719	0
#67	1.97123	0
#68	4.4981	3.81048
#69	12.5237	0
#70	9.42436	6.80538
#71	7.12563	10.2207
#72	3.63426	1.15215
#73	0.559573	4.37672
#74	19.302	4.6543
